# Supplementary material for: Snapshots of sequential polyphosphide rearrangement upon metallatetrylene addition
Source: Royal Society of Chemistry journal article supplement (doi:10.1039/d3sc00806a), 2023-01-01
Supplement: d3sc00806a1.pdf [file d3sc00806a1.pdf]

## SUPPORTING INFORMATION

### Snapshots of Sequential Polyphosphide Rearrangement upon Metallatetrylene Addition

Xiaofei Sun,<sup>[a]</sup> Alexander Hinz,<sup>[a]</sup> Stephan Schulz,<sup>[b]</sup> Lisa Zimmermann,<sup>[c]</sup> Manfred Scheer<sup>[c]</sup> and Peter W. Roesky<sup>\*[a]</sup>

[a] Dr. X. Sun, Dr. A. Hinz, Prof. Dr. P. W. Roesky, Institute of Inorganic Chemistry, Karlsruhe Institute of Technology (KIT), Engesserstraße 15, 76131, Karlsruhe, Germany.

[b] Prof. Dr. S. Schulz, Institute for Inorganic Chemistry and Center for Nanointegration Duisburg-Essen (Cenide), University of Duisburg-Essen, Universitätsstraße 5–7, 45117, Essen, Germany.

[c] Lisa Zimmermann, Prof. Dr. M. Scheer, Institute of Inorganic Chemistry, University of Regensburg, Universitätsstr.31, 93040 Regensburg, Germany.

#### Table of Contents

|                                                                      |     |
|----------------------------------------------------------------------|-----|
| I. Synthesis and characterization.....                               | S4  |
| I.1 General procedures.....                                          | S4  |
| I.2 Synthesis of <b>1</b> .....                                      | S5  |
| I.3 Synthesis of <b>2</b> .....                                      | S6  |
| I.4 Synthesis of <b>3</b> .....                                      | S7  |
| I.5 Synthesis of <b>4</b> .....                                      | S8  |
| I.6 Synthesis of <b>5</b> .....                                      | S9  |
| I.7 Synthesis of <b>6</b> .....                                      | S10 |
| I.8 Synthesis of <b>7</b> .....                                      | S11 |
| II. NMR spectra.....                                                 | S12 |
| III. Details of the simulation of the NMR spectra.....               | S23 |
| III.1 Experimental and simulated spectra of <b>1</b> (at 193 K)..... | S23 |
| III.2 Experimental and simulated spectra of <b>2</b> .....           | S24 |
| III.3 Experimental and simulated spectra of <b>3</b> .....           | S25 |
| IV. IR spectra.....                                                  | S26 |
| V. X-ray crystallography.....                                        | S29 |
| V.1 General methods.....                                             | S29 |
| V.2 Summary of crystal data.....                                     | S30 |
| V.3 Crystal structures.....                                          | S31 |
| VI. Quantum chemical calculations.....                               | S38 |
| VI.1 Computed Energetics and NMR data.....                           | S38 |
| VI.2 Reaction pathway with model compounds.....                      | S39 |
| VI.3 Optimized structures Complete molecules.....                    | S39 |

|                                                                        |     |
|------------------------------------------------------------------------|-----|
| VI.3.1 compound <b>1</b> , P .....                                     | S39 |
| VI.3.2 compound <b>1</b> , As analogue.....                            | S41 |
| VI.3.3 compound <b>2</b> , P .....                                     | S43 |
| VI.3.4 compound <b>2</b> , As analogue.....                            | S45 |
| VI.3.5 compound <b>3</b> , P .....                                     | S47 |
| VI.3.6 compound <b>3</b> , As analogue (= compound <b>5</b> ) .....    | S49 |
| VI.3.7 compound <b>4</b> , P analogue.....                             | S51 |
| VI.3.8 compound <b>4</b> , As.....                                     | S53 |
| VI.3.9 compound <b>7</b> , As/Ge.....                                  | S55 |
| VI.4 Optimized structures: Model compounds and transition states ..... | S57 |
| VI.4.1 gallasilylene .....                                             | S57 |
| VI.4.2 gallagermylene .....                                            | S57 |
| VI.4.3 CpFeP <sub>5</sub> .....                                        | S58 |
| VI.4.4 CpFeAs <sub>5</sub> .....                                       | S58 |
| VI.4.5 Int1 <sup>M</sup> – P/Si.....                                   | S58 |
| VI.4.6 Int2 <sup>M</sup> – P/Si.....                                   | S59 |
| VI.4.7 Int3 <sup>M</sup> – P/Si.....                                   | S59 |
| VI.4.8 Int4 <sup>M</sup> – P/Si.....                                   | S60 |
| VI.4.9 Int5 <sup>M</sup> – P/Si.....                                   | S61 |
| VI.4.10 Int6 <sup>M</sup> – P/Si.....                                  | S61 |
| VI.4.11 Int7 <sup>M</sup> – P/Si.....                                  | S62 |
| VI.4.12 Int8 <sup>M</sup> – P/Si.....                                  | S63 |
| VI.4.13 Int9 <sup>M</sup> – P/Si.....                                  | S63 |
| VI.4.14 TS1 <sup>M</sup> – P/Si.....                                   | S64 |
| VI.4.15 TS2 <sup>M</sup> – P/Si.....                                   | S65 |
| VI.4.16 TS3 <sup>M</sup> – P/Si.....                                   | S65 |
| VI.4.17 TS4 <sup>M</sup> – P/Si.....                                   | S66 |
| VI.4.18 TS5 <sup>M</sup> – P/Si.....                                   | S66 |
| VI.4.19 TS6 <sup>M</sup> – P/Si.....                                   | S67 |
| VI.4.20 TS7 <sup>M</sup> – P/Si.....                                   | S68 |
| VI.4.21 TS8 <sup>M</sup> – P/Si.....                                   | S68 |
| VI.4.22 TS9 <sup>M</sup> – P/Si.....                                   | S69 |
| VI.4.23 TS10 <sup>M</sup> – P/Si.....                                  | S70 |
| VI.4.24 Int1 <sup>M</sup> – As/Si .....                                | S70 |
| VI.4.25 Int2 <sup>M</sup> – As/Si .....                                | S71 |
| VI.4.26 Int3 <sup>M</sup> – As/Si.....                                 | S72 |

|                                         |     |
|-----------------------------------------|-----|
| VI.4.27 Int4 <sup>M</sup> – As/Si ..... | S72 |
| VI.4.28 Int5 <sup>M</sup> – As/Si ..... | S73 |
| VI.4.29 Int6 <sup>M</sup> – As/Si ..... | S74 |
| VI.4.30 Int7 <sup>M</sup> – As/Si ..... | S74 |
| VI.4.31 Int8 <sup>M</sup> – As/Si ..... | S75 |
| VI.4.32 Int9 <sup>M</sup> – As/Si ..... | S76 |
| VI.4.33 Int1 <sup>M</sup> – P/Ge .....  | S76 |
| VI.4.34 Int2 <sup>M</sup> – P/Ge .....  | S77 |
| VI.4.35 Int3 <sup>M</sup> – P/Ge .....  | S77 |
| VI.4.36 Int4 <sup>M</sup> – P/Ge .....  | S78 |
| VI.4.37 Int5 <sup>M</sup> – P/Ge .....  | S79 |
| VI.4.38 Int6 <sup>M</sup> – P/Ge .....  | S79 |
| VI.4.39 Int7 <sup>M</sup> – P/Ge .....  | S80 |
| VI.4.40 Int8 <sup>M</sup> – P/Ge .....  | S81 |
| VI.4.41 Int9 <sup>M</sup> – P/Ge .....  | S81 |
| VI.4.42 Int1 <sup>M</sup> – As/Ge ..... | S82 |
| VI.4.43 Int2 <sup>M</sup> – As/Ge ..... | S83 |
| VI.4.44 Int3 <sup>M</sup> – As/Ge ..... | S83 |
| VI.4.45 Int4 <sup>M</sup> – As/Ge ..... | S84 |
| VI.4.46 Int5 <sup>M</sup> – As/Ge ..... | S85 |
| VI.4.47 Int6 <sup>M</sup> – As/Ge ..... | S85 |
| VI.4.48 Int7 <sup>M</sup> – As/Ge ..... | S86 |
| VI.4.49 Int8 <sup>M</sup> – As/Ge ..... | S87 |
| VI.4.50 Int9 <sup>M</sup> – As/Ge ..... | S87 |
| VII. References.....                    | S89 |

## I. Synthesis and characterization

### I.1 General procedures

All air- and moisture-sensitive manipulations were performed under dry N<sub>2</sub> or Ar atmosphere using standard Schlenk techniques or in an argon-filled MBraun glovebox, unless otherwise stated. Et<sub>2</sub>O, *n*-pentane, and toluene were dried using an MBraun solvent purification system (SPS-800) and degassed. THF, benzene and *n*-hexane were distilled under nitrogen from potassium benzophenone ketyl. C<sub>6</sub>D<sub>6</sub>, toluene-*d*<sub>8</sub> and THF-*d*<sub>8</sub> were dried over Na-K alloy and degassed by freeze-pump-thaw cycles. [L<sup>BDI</sup>Ga(Cl)-SiL<sup>Ph</sup>]<sup>[S1]</sup> (L<sup>BDI</sup> = {N(Dipp)C(Me)}<sub>2</sub>CH, Dipp = 2,6-*i*Pr-C<sub>6</sub>H<sub>3</sub>, L<sup>Ph</sup> = PhC(NtBu)<sub>2</sub>), [L<sup>BDI</sup>Ga]<sup>[S2]</sup> [L<sup>Ph</sup>GeCl]<sup>[S3]</sup> [Cp\*Fe( $\eta^5$ -P<sub>5</sub>)]<sup>[S4]</sup> and [Cp\*Fe( $\eta^5$ -As<sub>5</sub>)]<sup>[S5]</sup> were prepared according to the literature procedures. All other chemicals were obtained from commercial sources and used without further purification.

Elemental analyses were carried out with an Elementar vario MICRO cube.

NMR spectra were recorded on Bruker spectrometers (Avance Neo 300 MHz, Avance Neo 400 MHz or Avance III 400 MHz). Chemical shifts are referenced internally using signals of the residual protio solvent (<sup>1</sup>H) or the solvent (<sup>13</sup>C{<sup>1</sup>H}) and are reported relative to tetramethylsilane (<sup>1</sup>H, <sup>13</sup>C{<sup>1</sup>H}), or externally relative to tetramethylsilane (<sup>29</sup>Si), H<sub>3</sub>PO<sub>4</sub> (<sup>31</sup>P). All NMR spectra were measured at 298 K, unless otherwise specified. The multiplicity of the signals is indicated as s = singlet, d = doublet, dd = doublet of doublets, t = triplet, q = quartet, m = multiplet and br = broad. Assignments were determined based on unambiguous chemical shifts, coupling patterns and <sup>13</sup>C-DEPT experiments or 2D correlations (<sup>1</sup>H-<sup>1</sup>H COSY, <sup>1</sup>H-<sup>13</sup>C HMQC and <sup>1</sup>H-<sup>13</sup>C HMBC).

Infrared (IR) spectra were recorded in the region 4000–400 cm<sup>-1</sup> on a Bruker Tensor 37 FTIR spectrometer equipped with a room temperature DLaTGS detector, a diamond attenuated total reflection (ATR) unit and a nitrogen-flushed chamber. In terms of their intensity, the signals were classified into different categories (vs = very strong, s = strong, m = medium, w = weak, and sh = shoulder).

## I.2 Synthesis of **1**

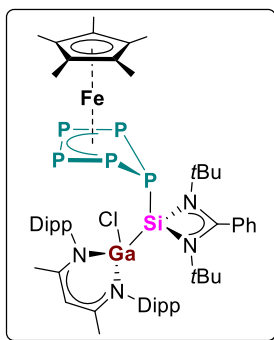

To a J. Young NMR tube containing a mixture of  $[\text{Cp}^*\text{Fe}(\eta^5\text{-P}_5)]$  (10.0 mg, 0.029 mmol) and  $[\text{L}^{\text{NacNac}}\text{Ga}(\text{Cl})\text{-SiL}^{\text{Ph}}]$  (22.6 mg, 0.029 mmol) was condensed toluene- $d_8$  (ca. 0.4 mL) at  $-196^\circ\text{C}$ , and the resulting mixture was carefully warmed up to  $-80^\circ\text{C}$ . The NMR tube was then shaken until everything dissolved and low-temperature variable temperature  $^{31}\text{P}\{^1\text{H}\}$  NMR measurements were performed (from  $-80^\circ\text{C}$  to  $25^\circ\text{C}$ ). The low temperature  $^{31}\text{P}\{^1\text{H}\}$  NMR spectra indicates the clean formation of the title compound **1**. However, at already  $-10^\circ\text{C}$ , traces of compound **2** are formed and at room temperature after 2 h, all signals belonging to **1** disappeared and only **2** and small amounts of  $[\text{Cp}^*\text{Fe}(\eta^5\text{-P}_5)]$  are visible (see Figure S1).

Crystals suitable for X-ray diffraction analysis were obtained from benzene.

$^{31}\text{P}\{^1\text{H}\}$  NMR (162 MHz, toluene- $d_8$ ): AA'MM'X spin system  $\delta$  (ppm) = 37.4 (1P,  $\text{P}_X$ ), 31.3 (2P,  $\text{P}_M, \text{P}_{M'}$ ), –50.6 (2P,  $\text{P}_A, \text{P}_{A'}$ ), for details, see Figure S21 and Table S1.

I.3 Synthesis of **2**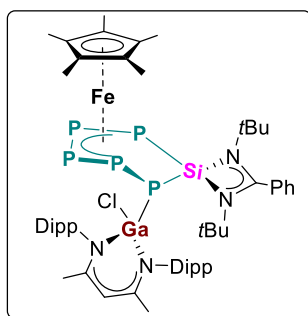

To a mixture of  $[\text{Cp}^*\text{Fe}(\eta^5\text{-P}_5)]$  (50.0 mg, 0.145 mmol) and  $[\text{L}^{\text{NacNac}}\text{Ga}(\text{Cl})\text{-SiL}^{\text{Ph}}]$  (113.1 mg, 0.145 mmol) was condensed toluene (*ca.* 5 mL) at  $-78^\circ\text{C}$ , and the resulting mixture was warmed up to room temperature and turned dark brown. After stirring for 1 h at room temperature, all solvents were removed under reduced pressure and *n*-hexane was added to the residue. Single-crystals of **2**, suitable for X-ray diffraction analysis could be obtained from *n*-hexane at room temperature.

Yield (based on crystals): 41% (69.5 mg, 0.059 mmol).

Anal. Calcd. For  $\text{C}_{54}\text{H}_{79}\text{ClFeGaN}_4\text{P}_5\text{Si}$  ( $0.5 \text{ C}_6\text{H}_{14}$ ) (1171.31 g/mol): C 58.45; H 7.40; N 4.78. Found: C 58.76; H 7.06; N 4.77.

$^1\text{H NMR}$  (400 MHz,  $\text{C}_6\text{D}_6$ ):  $\delta$  (ppm) = 7.38-7.36 (m, 1H,  $\text{CH}_{\text{Ar}}$ ), 7.32-7.23 (m, 3H,  $\text{CH}_{\text{Ar}}$ ), 7.20-7.18 (m, 1H,  $\text{CH}_{\text{Ar}}$ ), 6.98-6.91 (m, 5H,  $\text{CH}_{\text{Ar}}$ ), 6.87-6.83 (m, 1H,  $\text{CH}_{\text{Ar}}$ ), 4.98 (s, 1H, CH), 3.96, 3.74, 3.58, 3.40 (four sets of sept,  $^3J = 6.9$  Hz, 4H,  $\text{CH}_{\text{Dipp}}$ ), 2.09 (d,  $^3J = 6.9$  Hz, 3H,  $\text{CH}_3_{\text{Dipp}}$ ), 1.70 (s, 15H,  $\text{C}_5(\text{CH}_3)_5$ ), 1.64 (s, 3H,  $\text{L}^{\text{NacNac}}\text{-NCCH}_3$ ), 1.49-1.43 (overlapped signals of 9H, 3H of  $\text{L}^{\text{NacNac}}\text{-NCCH}_3$  + 6H  $\text{CH}_3_{\text{Dipp}}$ ), 1.39-1.33 (overlapped signals of 15H, 9H of  $\text{C}(\text{CH}_3)_3$  + 6H of  $\text{CH}_3_{\text{Dipp}}$ ), 1.28-1.19 (m, overlapped signals of *ca.* 4H  $\text{CH}_3_{n\text{-hex}}$  + 6H  $\text{CH}_3_{\text{Dipp}}$ ), 1.06 (d,  $^3J = 6.9$  Hz, 3H,  $\text{CH}_3_{\text{Dipp}}$ ), 0.89 (t,  $^3J = 5.6$  Hz, *ca.* 3H,  $\text{CH}_3_{n\text{-hex}}$ ), 0.74 (s, 9H,  $\text{C}(\text{CH}_3)_3$ ).

$^{31}\text{P}\{^1\text{H}\}$  NMR (162 MHz,  $\text{C}_6\text{D}_6$ ): AMXYZ spin system  $\delta$  (ppm) = 85.9 (1P,  $\text{P}_{\text{A}}$ ), 44.8 (1P,  $\text{P}_{\text{M}}$ ), 28.8 (1P,  $\text{P}_{\text{X}}$ ), -3.6 (1P,  $\text{P}_{\text{Y}}$ ), -219.2 ( $\text{P}_{\text{Z}}$ ), for details, see Figure S22 and Table S2.

$^{13}\text{C}\{^1\text{H}\}$  NMR (101 MHz,  $\text{C}_6\text{D}_6$ ):  $\delta$  (ppm) = 172.4 (NCN), 170.3 ( $\text{L}^{\text{NacNac}}\text{-NCCH}_3$ ), 169.2 ( $\text{L}^{\text{NacNac}}\text{-NCCH}_3$ ), 145.3 (Dipp-*o*-C), 145.1 (Dipp-*o*-C), 144.6 (Dipp-*m*-C), 144.2 (Dipp-*m*-C), 142.9 (Dipp-*m*-C), 141.3 (Dipp-*m*-C), 130.6 (Ph- $\text{C}_{\text{q}}$ ), 130.7, 129.3, 128.3, 128.04, 128.01, 127.8, 127.5, 125.0, 124.72, 124.67, 124.5, 98.8 ( $\text{L}^{\text{NacNac}}\text{-}\gamma\text{-CH}$ ), 89.3 ( $\text{C}_5(\text{CH}_3)_5$ ), 55.9 ( $\text{C}(\text{CH}_3)_3$ ), 55.4 ( $\text{C}(\text{CH}_3)_3$ ), 31.8 (*n*-hex- $\text{CH}_2$ ), 31.8 ( $\text{C}(\text{CH}_3)_3$ ), 31.2 ( $\text{C}(\text{CH}_3)_3$ ), 23.1 (*n*-hex- $\text{CH}_2$ ), 14.4 (*n*-hex- $\text{CH}_3$ ), 11.1 ( $\text{C}_5(\text{CH}_3)_5$ ).

$^{29}\text{Si}\{^1\text{H}\}$  NMR (80 MHz,  $\text{C}_6\text{D}_6$ ):  $\delta$  (ppm) = 57.1 (t,  $^1J_{\text{SiP}} = 159$  Hz).

IR (ATR):  $\tilde{\nu}$  ( $\text{cm}^{-1}$ ) = 2961 (w), 1614 (w), 1524 (m), 1385 (s), 1313 (s), 1236 (vs), 1180 (s), 1128 (s), 1022 (s), 983 (s), 936 (m), 867 (m), 796 (m), 759 (s), 707 (m), 644 (m), 553 (w), 532 (w), 491 (w), 411 (w).

### I.4 Synthesis of **3**

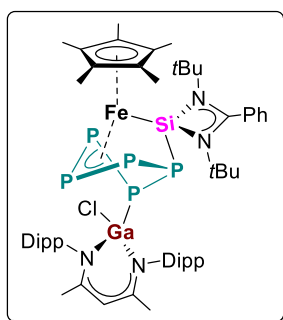

A J. Young NMR tube containing a  $C_6D_6$  solution (ca. 0.4 mL) of compound **2** (30.0 mg, 0.026 mmol) was heated for 24 h at 80 °C and a  $^{31}P\{^1H\}$  NMR spectrum was recorded, showing the thermolysis was complete. All solvents were removed under reduced pressure and *n*-hexane was condensed to the NMR tube. Keeping the *n*-hexane solution undisturbed at room temperature afford complex **3** as green crystalline materials.

Single crystals of **3** which were suitable for X-ray diffraction analysis could be obtained from a concentrated  $C_6D_6$  solution.

Yield (based on crystals): 72% (21.5 mg, 0.018 mmol).

Anal. Calcd. For  $C_{54}H_{79}ClFeGaN_4P_5Si$  (0.5  $C_6H_{14}$ ) (1171.31 g/mol): C 58.45; H 7.40; N 4.78. Found: C 59.09; H 7.21; N 4.76.

$^1H$  NMR (400 MHz,  $C_6D_6$ ):  $\delta$  (ppm) = 7.45 (dd,  $^3J = 5.8$  Hz,  $^4J = 3.5$  Hz, 1H,  $CH_{Ar}$ ), 7.34-7.44 (m, 1H,  $CH_{Ar}$ ), 7.23-7.18 (m, 3H,  $CH_{Ar}$ ), 7.15-7.11 (m, 1H,  $CH_{Ar}$ ), 7.02-6.87 (m, 5H,  $CH_{Ar}$ ), 4.95 (s, 1H, CH), 3.95, 3.75, 3.56, (three sets of sept in 1:2:1 ratio,  $^3J = 6.6$  Hz, 4H,  $CH_{Dipp}$ ), 2.10 (d,  $^3J = 6.9$  Hz, 3H,  $CH_3_{Dipp}$ ), 1.82 (d,  $^3J = 6.9$  Hz, 3H,  $CH_3_{Dipp}$ ), 1.75-1.72 (overlapped signals of 18H, 15H of  $C_5(CH_3)_5$  and 3H of  $CH_3_{Dipp}$ ), 1.70 (s, 3H,  $L^{NacNac-NCCH_3}$ ), 1.62 (s, 3H,  $L^{NacNac-NCCH_3}$ ), 1.58 (d,  $^3J = 6.9$  Hz, 3H,  $CH_3_{Dipp}$ ), 1.31 (d,  $^3J = 6.9$  Hz, 3H,  $CH_3_{Dipp}$ ), 1.24-1.21 (overlapped signals of ca 16H, 9H of  $C(CH_3)_3$  + 3H of  $CH_3_{Dipp}$  + ca. 4H of  $CH_2_{n-hex}$ ), 1.18 (d,  $^3J = 6.9$  Hz, 3H,  $CH_3_{Dipp}$ ), 1.15 (d,  $^3J = 6.9$  Hz, 3H,  $CH_3_{Dipp}$ ), 0.97 (s, 9H,  $C(CH_3)_3$ ), 0.89 (t,  $^3J = 7.0$  Hz, ca. 3H,  $CH_3_{n-hex}$ )

$^{13}C\{^1H\}$  NMR (101 MHz,  $C_6D_6$ ):  $\delta$  (ppm) = 172.0 (NCN), 169.2 ( $L^{NacNac-NCCH_3}$ ), 168.8 ( $L^{NacNac-NCCH_3}$ ), 146.41 (Dipp-*o*-C), 146.44 (Dipp-*o*-C), 143.3 (Dipp-*m*-C), 143.1 (Dipp-*m*-C), 142.4 (Dipp-*m*-C), 141.8 (Dipp-*m*-C), 132.4 (Ph- $C_q$ ), 130.3, 129.8, 129.4, 128.6, 127.6, 127.5, 127.1, 125.9, 125.4, 123.9, 123.5, 97.6 ( $L^{NacNac-\gamma-CH}$ ), 88.3 ( $C_5(CH_3)_5$ ), 54.9 ( $C(CH_3)_3$ ), 33.3 ( $C(CH_3)_3$ ), 32.3 ( $C(CH_3)_3$ ), 31.9 (*n*-hex- $CH_2$ ), 30.3, 29.6, 28.4, 28.1, 27.9, 27.4, 25.3, 25.2, 25.1, 24.9, 24.7, 24.5 ( $L^{NacNac-iPr-CH}$ ,  $iPr-CH_3$ ), 23.9, 23.8 ( $L^{NacNac-NCCH_3}$ ), 23.1 (*n*-hex- $CH_2$ ), 14.4 (*n*-hex- $CH_3$ ), 11.7 ( $C_5(CH_3)_5$ ).

$^{31}P\{^1H\}$  NMR (162 MHz,  $C_6D_6$ ): AMNXZ spin system  $\delta$  (ppm) = 224.0 (1P,  $P_A$ ), 88.5 (1P,  $P_M$ ), 12.1 (1P,  $P_N$ ), -57.6 (1P,  $P_X$ ), -67.7 ( $P_Z$ ), for details, see Figure S23 and Table S3.

$^{29}Si\{^1H\}$  NMR (80 MHz,  $C_6D_6$ ):  $\delta$  (ppm) = 63.4 (m).

IR (ATR):  $\tilde{\nu}$  ( $cm^{-1}$ ) = 2969 (w), 2894 (w), 2866 (w), 1549 (sh), 1523 (m), 1440 (m), 1389 (vs), 1317 (s), 1254 (m), 1194 (m), 1177 (m), 1102 (w), 1077 (w), 1058 (w), 1021 (s), 939 (w), 863 (w), 793 (s), 755 (s), 726 (s), 708 (s), 619 (vs), 498 (s), 464 (s), 435 (s).

## I.5 Synthesis of 4

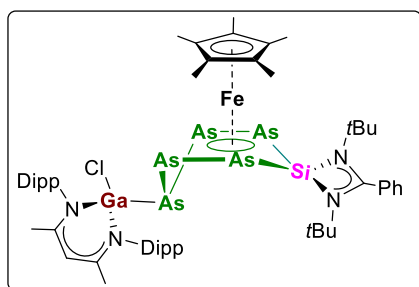

To a J. Young NMR tube containing a mixture of  $[\text{Cp}^*\text{Fe}(\eta^5\text{-As}_5)]$  (15.0 mg, 0.027 mmol) and  $[\text{L}^{\text{NacNac}}\text{Ga}(\text{Cl})\text{-SiL}^{\text{Ph}}]$  (20.8 mg, 0.027 mmol) was condensed  $\text{C}_6\text{D}_6$  (ca. 0.4 mL) at  $-78^\circ\text{C}$ , and the resulting mixture was warmed up to room temperature and turned red-brown. The NMR tube was sonicated for 10 min at room temperature and a  $^1\text{H}$  NMR spectrum was recorded, showing the reaction was complete. All solvents were removed under reduced pressure and *n*-hexane was condensed to the

NMR tube. Keeping the *n*-hexane solution undisturbed at room temperature for ca. 30 min led to the formation of single-crystals, which were suitable for X-ray diffraction analysis.

Yield (based on crystals): 49% (18.3 mg, 0.013 mmol).

Anal. Calcd. For  $\text{C}_{54}\text{H}_{79}\text{ClFeGaN}_4\text{As}_5\text{Si}$  ( $0.5 \text{ C}_6\text{H}_{14}$ ) (1389.10 g/mol): C 49.22; H 6.23; N 4.03. Found: C 48.82; H 5.94; N 3.73.

$^1\text{H}$  NMR (400 MHz,  $\text{C}_6\text{D}_6$ ):  $\delta$  (ppm) = 7.30 (dd,  $^3J = 7.5$  Hz,  $^4J = 1.8$  Hz, 2H,  $\text{CH}_{\text{Ar}}$ ), 7.19 (t,  $^3J = 7.6$  Hz, 3H,  $\text{CH}_{\text{Ar}}$ ), 6.89-6.84 (m, 2H,  $\text{CH}_{\text{Ar}}$ ), 6.74 (t,  $^3J = 7.6$  Hz, 2H,  $\text{CH}_{\text{Ar}}$ ), 6.54 (d,  $^3J = 7.1$  Hz, 2H,  $\text{CH}_{\text{Ar}}$ ), 5.00 (s, 1H,  $\gamma\text{-CH}$ ), 4.04, 3.41, (two sets of sept in 1:1 ratio,  $^3J = 6.8$  Hz, 4H,  $\text{CH}_{\text{Dipp}}$ ), 1.96 (d,  $^3J = 6.8$  Hz, 6H,  $\text{CH}_3_{\text{Dipp}}$ ), 1.79 (s, 15H,  $\text{C}_5(\text{CH}_3)_5$ ), 1.70 (s, 6H,  $\text{L}^{\text{NacNac}}\text{-NCCH}_3$ ), 1.50 (d,  $^3J = 6.8$  Hz, 6H,  $\text{CH}_3_{\text{Dipp}}$ ), 1.30 (d,  $^3J = 6.8$  Hz, 6H,  $\text{CH}_3_{\text{Dipp}}$ ), 1.27 (s, 9H,  $\text{C}(\text{CH}_3)_3$ ). 1.25-1.20 (m, ca. 4H,  $\text{CH}_2$  *n*-hex), 1.11 (d,  $^3J = 6.8$  Hz, 6H,  $\text{CH}_3_{\text{Dipp}}$ ), 0.90-0.87 (m, ca. 6H,  $\text{CH}_3$  *n*-hex), 0.82 (s, 9H,  $\text{C}(\text{CH}_3)_3$ ).

$^{13}\text{C}\{^1\text{H}\}$  NMR (101 MHz,  $\text{C}_6\text{D}_6$ ):  $\delta$  (ppm) = 168.5 (NCN), 146.2 (Dipp-*o*-C), 143.9 (Dipp-*o*-C), 143.1 (Dipp-*m*-C), 141.8 (Dipp-*m*-C), 131.6, 130.1, 128.3, 127.8, 127.4, 125.5, 123.76, 123.73, 97.6 ( $\text{L}^{\text{NacNac}}\text{-}\gamma\text{-CH}$ ), 84.8 ( $\text{C}_5(\text{CH}_3)_5$ ), 56.8 ( $\text{C}(\text{CH}_3)_3$ ), 55.3 ( $\text{C}(\text{CH}_3)_3$ ), 33.1 ( $\text{C}(\text{CH}_3)_3$ ), 31.7 ( $\text{C}(\text{CH}_3)_3$ ), 31.9 (*n*-hex- $\text{CH}_2$ ), 31.5, 29.7, 28.4, 27.6, 25.0, 24.82, 23.9 ( $\text{L}^{\text{NacNac}}\text{-iPr-CH}$ , *iPr-CH*), 25.0 ( $\text{L}^{\text{NacNac}}\text{-NCCH}_3$ ), 23.1 (*n*-hex- $\text{CH}_2$ ), 14.4 (*n*-hex- $\text{CH}_3$ ), 11.7 ( $\text{C}_5(\text{CH}_3)_5$ ). Two  $^{13}\text{C}$  signals could not be detected.

$^{29}\text{Si}\{^1\text{H}\}$  NMR (80 MHz,  $\text{C}_6\text{D}_6$ ):  $\delta$  (ppm) =  $-4.7$  (s).

IR (ATR):  $\tilde{\nu}$  ( $\text{cm}^{-1}$ ) = 2996 (s), 2890 (s), 2831 (s), 1552 (m), 1524 (s), 1441 (sh), 1400 (vs), 1317 (s), 1256 (m), 1176 (s), 1107 (w), 1080 (w), 1020 (s), 940 (w), 859 (w), 792 (s), 756 (vs), 726 (m), 708 (m), 613 (s), 482 (w), 437 (m).



## I.6 Synthesis of 5

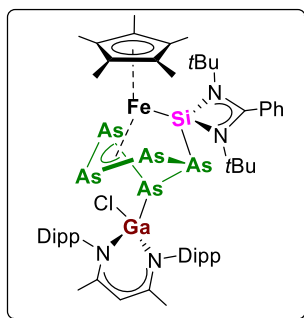

A J. Young NMR tube containing a  $C_6D_6$  solution (ca. 0.4 mL) of compound **4** (25.0 mg, 0.018 mmol) was heated for 6 h at 80 °C and a  $^1H$  NMR spectrum was recorded, showing the thermolysis was complete. All solvents were removed under reduced pressure and *n*-hexane was condensed to the NMR tube. Keeping the *n*-hexane solution undisturbed at room temperature for ca. 15 min led to the formation of green prisms, which were suitable for X-ray diffraction analysis.

Yield (based on crystals): 47% (11.7 mg, 0.008 mmol).

Anal. Calcd. For  $C_{54}H_{79}ClFeGaN_4As_5Si$  ( $0.5 C_6H_{14}$ ) (1389.10 g/mol): C 49.22; H 6.23; N 4.03. Found: C 49.97; H 5.46; N 3.97.

$^1H$  NMR (400 MHz,  $C_6D_6$ ):  $\delta$  (ppm) = 7.43 (dd,  $^3J = 7.4$  Hz,  $^4J = 1.9$  Hz, 1H,  $CH_{Ar}$ ), 7.32-7.18 (m, 5H,  $CH_{Ar}$ ), 7.15-7.14 (m, 1H,  $CH_{Ar}$ ), 6.97-6.79 (m, 4H,  $CH_{Ar}$ ), 4.96 (s, 1H,  $\gamma$ -CH), 3.99, 3.79, 3.63, (three sets of sept in 1:2:1 ratio,  $^3J = 6.6$  Hz, 4H,  $CH_{Dipp}$ ), 2.18 (d,  $^3J = 6.9$  Hz, 3H,  $CH_3_{Dipp}$ ), 1.78-1.76 (overlapped signals of 21H, 15H of  $C_5(CH_3)_5$  and 6H of  $CH_3_{Dipp}$ ), 1.71 (s, 3H,  $L^{NacNac-NCCH_3}$ ), 1.62 (s, 3H,  $L^{NacNac-NCCH_3}$ ), 1.58 (d,  $^3J = 6.9$  Hz, 3H,  $CH_3_{Dipp}$ ), 1.32 (d,  $^3J = 6.9$  Hz, 3H,  $CH_3_{Dipp}$ ), 1.21-1.14 (overlapped signals of ca 19H, 9H of  $C(CH_3)_3 + 9H$  of  $CH_3_{Dipp} + CH_2_{n-hex}$ ), 1.03 (s, 9H,  $C(CH_3)_3$ ), 0.89 ( $CH_3_{n-hex}$ )

$^{13}C\{^1H\}$  NMR (101 MHz,  $C_6D_6$ ):  $\delta$  (ppm) = 170.3 (NCN), 168.8 ( $L^{NacNac-NCCH_3}$ ), 168.5 ( $L^{NacNac-NCCH_3}$ ), 146.51 (Dipp-*o*-C), 146.49 (Dipp-*o*-C), 143.3 (Dipp-*m*-C), 143.0 (Dipp-*m*-C), 142.2 (Dipp-*m*-C), 141.9 (Dipp-*m*-C), 132.6 (Ph- $C_q$ ), 130.1, 130.0, 129.6, 127.6, 127.5, 127.4, 127.2, 126.0, 125.6, 123.8, 123.7, 97.5 ( $L^{NacNac-\gamma-CH}$ ), 87.0 ( $C_5(CH_3)_5$ ), 54.7 ( $C(CH_3)_3$ ), 54.6 ( $C(CH_3)_3$ ), 33.4 ( $C(CH_3)_3$ ), 32.5 ( $C(CH_3)_3$ ), 31.9 (*n*-hex- $CH_2$ ), 30.3, 29.8, 28.39, 28.35, 28.0, 27.6, 25.3, 25.13, 25.10, 24.82, 24.6, 24.5 ( $L^{NacNac-iPr-CH}$ , *iPr-CH*), 23.8 ( $L^{NacNac-NCCH_3}$ ), 23.1 (*n*-hex- $CH_2$ ), 14.4 (*n*-hex- $CH_3$ ), 12.2 ( $C_5(CH_3)_5$ ).

$^{29}Si\{^1H\}$  NMR (80 MHz,  $C_6D_6$ ):  $\delta$  (ppm) = 37.1.

IR (ATR):  $\tilde{\nu}$  ( $cm^{-1}$ ) = 2964 (w), 2901 (w), 2865 (w), 1551 (m), 1524 (m), 1461 (sh), 1438 (s), 1393 (vs), 1318 (s), 1250 (m), 1195 (m), 1178 (m), 1099 (w), 1074 (w), 1022 (s), 933 (w), 864 (m), 793 (s), 753 (s), 724 (sh), 708 (m), 613 (s), 484 (m), 436 (s), 383 (m).

I.7 Synthesis of **6**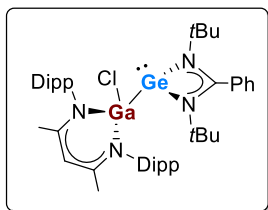

To a mixture of  $[L^{BDI}Ga]$  (72.0 mg, 0.148 mmol) and  $[L^{Ph}GeCl]$  (50.2 mg, 0.148 mmol) was condensed toluene (*ca.* 5 mL) at  $-78\text{ }^{\circ}C$ , the reaction mixture turned bright yellow and it was allowed to warm up to room temperature. After stirring the reaction mixture at room temperature for 1 h, the resulting solution was concentrated to about one third of its volume and stored in a  $5\text{ }^{\circ}C$  fridge. After 2 days, the solution was carefully decanted and the crystals were isolated, dried for 2 h under vacuum to afford the title compound **7**. The mother liquid was stored in the fridge again for further crystallization.

Single-crystals of **6**, suitable for X-ray diffraction analysis could be obtained from toluene at room temperature.

Yield (based on crystals): 85% (103.8 mg, 0.126 mmol).

Anal. Calcd. For  $C_{44}H_{64}ClGaGeN_4$  (826.83 g/mol): C 63.92; H 7.80; N 6.78. Found: C 63.79; H 7.73; N 6.73.

$^1H$  NMR (400 MHz,  $C_6D_6$ ):  $\delta$  (ppm) = 7.59-7.58 (m, 1H,  $CH_{Ar}$ ), 7.17-7.14 (m, 3H,  $CH_{Ar}$ ), 7.12-7.09 (m, 3H,  $CH_{Ar}$ ), 7.06-7.05 (m, 1H,  $CH_{Ar}$ ), 6.98-6.92 (m, 2H,  $CH_{Ar}$ ), 6.89-6.85 (m, 1H,  $CH_{Ar}$ ), 5.07 (s, 1H,  $\gamma$  CH), 3.88, 3.83, (two sets of sept,  $^3J = 6.8$  Hz, 4H,  $CH_{Dipp}$ ), 1.66 (s, 6H,  $L^{NacNac-NCCH_3}$ ), 1.63 (d,  $^3J = 6.8$  Hz, 12H,  $CH_3_{Dipp}$ ), 1.25 (d,  $^3J = 6.8$  Hz, 6H,  $CH_3_{Dipp}$ ), 1.17 (d,  $^3J = 6.8$  Hz, 6H,  $CH_3_{Dipp}$ ), 0.73 (s, 18H,  $C(CH_3)_3$ )

$^{13}C\{^1H\}$  NMR (101 MHz,  $C_6D_6$ ):  $\delta$  (ppm) = 167.3 ( $L^{NacNac-NCCH_3}$ ), 162.5 (NCN), 146.2 (Dipp-*m*-C), 144.2 (Dipp-*o*-C), 143.0 (Dipp-*m*-C), 137.2 (Ph- $C_q$ ), 132.2, 129.1, 128.7, 128.0, 127.2, 126.9, 125.5, 124.1 ( $CH_{Ar}$ ), 97.8 ( $L^{NacNac-\gamma}$ -CH), 52.9 ( $C(CH_3)_3$ ), 30.7 ( $C(CH_3)_3$ ), 30.3, 28.0, 27.6, 25.1, 24.7, 24.3, 24.2, ( $L^{NacNac-iPr}$ -CH, *iPr*- $CH_3$ ,  $NCCH_3$ ).

IR (ATR):  $\tilde{\nu}$  ( $cm^{-1}$ ) = 3054 (w), 2961 (m), 2926 (w), 2867 (w), 1612 (w), 1557 (m), 1524 (m), 1463 (m), 1388 (s), 1360 (vs), 1320 (s), 1288 (m), 1251 (m), 1202 (m), 1177 (m), 1102 (w), 1060 (w), 1020 (m), 938 (m), 899 (w), 856 (m), 793 (s), 763 (m), 743 (sh), 704 (s), 640 (w), 581 (w), 522 (w), 475 (m), 446 (m), 400 (w).

## I.8 Synthesis of 7

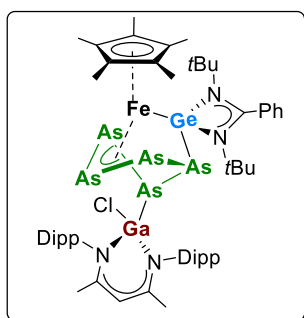

To a J. Young NMR tube containing a mixture of  $[\text{Cp}^*\text{Fe}(\eta^5\text{-As}_5)]$  (15.0 mg, 0.027 mmol) and  $[\text{L}^{\text{NacNac}}\text{Ga}(\text{Cl})\text{-GeL}^{\text{Ph}}]$  (21.8 mg, 0.027 mmol) was condensed  $\text{C}_6\text{D}_6$  (ca. 0.4 mL) at  $-78^\circ\text{C}$ , and the resulting mixture was warmed up to room temperature and turned brown. The NMR tube was sonicated for 10 min at room temperature and kept at room temperature for 48 h. An  $^1\text{H}$  NMR spectrum was recorded, showing the reaction was complete. The solvent was removed to ca. one third of the volume and kept undisturbed at room temperature overnight to afford green crystals suitable for X-ray diffraction analysis.

Yield (based on crystals): 53% (19.7 mg, 0.014 mmol).

Anal. Calcd. For  $\text{C}_{54}\text{H}_{79}\text{ClFeGaN}_4\text{As}_5\text{Ge}$  (1392.51 g/mol): C 46.58; H 5.72; N 4.02. Found: C 45.95; H 5.38; N 3.58.

$^1\text{H}$  NMR (400 MHz,  $\text{C}_6\text{D}_6$ ):  $\delta$  (ppm) = 7.43 (dd,  $^3J = 7.4$  Hz,  $^4J = 1.9$  Hz, 1H,  $\text{CH}_{\text{Ar}}$ ), 7.34-7.27 (m, 2H,  $\text{CH}_{\text{Ar}}$ ), 7.23-7.18 (m, 2H,  $\text{CH}_{\text{Ar}}$ ), 7.12-7.19 (m, 1H,  $\text{CH}_{\text{Ar}}$ ), 6.99-6.83 (m, 5H,  $\text{CH}_{\text{Ar}}$ ), 4.95 (s, 1H, CH), 4.02, 3.81, 3.72, 3.62 (four sets of sept in 1:1:1:1 ratio,  $^3J = 6.6$  Hz, 4H, CH Dipp), 2.22 (d,  $^3J = 6.6$  Hz, 3H,  $\text{CH}_3$  Dipp), 1.78-1.73 (overlapped signals of 21H, 15H of  $\text{C}_5(\text{CH}_3)_5$  and 6H of  $\text{CH}_3$  Dipp), 1.72 (s, 3H,  $\text{L}^{\text{NacNac}}\text{-NCCH}_3$ ), 1.61 (s, 3H,  $\text{L}^{\text{NacNac}}\text{-NCCH}_3$ ), 1.45 (d,  $^3J = 6.6$  Hz, 3H,  $\text{CH}_3$  Dipp), 1.34 (d,  $^3J = 6.9$  Hz, 3H,  $\text{CH}_3$  Dipp), 1.21-1.20 (overlapped signals of 12H, 9H of  $\text{C}(\text{CH}_3)_3$  + 3H of  $\text{CH}_3$  Dipp), 1.14 (d,  $^3J = 6.6$  Hz, 3H,  $\text{CH}_3$  Dipp), 1.12 (d,  $^3J = 6.9$  Hz, 3H,  $\text{CH}_3$  Dipp), 0.96 (s, 9H,  $\text{C}(\text{CH}_3)_3$ ).

$^{13}\text{C}\{^1\text{H}\}$  NMR (101 MHz,  $\text{C}_6\text{D}_6$ ):  $\delta$  (ppm) = 169.9 (NCN), 168.9 ( $\text{L}^{\text{NacNac}}\text{-NCCH}_3$ ), 168.7 ( $\text{L}^{\text{NacNac}}\text{-NCCH}_3$ ), 146.5 (Dipp-*o*-C), 146.4 (Dipp-*o*-C), 143.2 (Dipp-*m*-C), 143.1 (Dipp-*m*-C), 142.1 (Dipp-*m*-C), 141.7 (Dipp-*m*-C), 133.9 (Ph- $\text{C}_q$ ), 130.0, 129.6, 129.5, 127.61, 127.56, 127.4, 127.3, 125.9, 125.7, 123.9, 123.8, 97.5 ( $\text{L}^{\text{NacNac}}\text{-}\gamma\text{-CH}$ ), 86.8 ( $\text{C}_5(\text{CH}_3)_5$ ), 54.5 ( $\text{C}(\text{CH}_3)_3$ ), 54.1 ( $\text{C}(\text{CH}_3)_3$ ), 33.1 ( $\text{C}(\text{CH}_3)_3$ ), 32.6 ( $\text{C}(\text{CH}_3)_3$ ), 30.3, 29.8, 28.39, 28.3, 27.9, 27.5, 25.24, 25.15, 25.11, 24.8, 24.6, 23.8 ( $\text{L}^{\text{NacNac}}\text{-iPr-CH}$ , iPr- $\text{CH}_3$ ), 12.1 ( $\text{C}_5(\text{CH}_3)_5$ ).

IR (ATR):  $\tilde{\nu}$  ( $\text{cm}^{-1}$ ) = 2964 (w), 1550 (w), 1525 (m), 1389 (m), 1360 (m), 1312 (s), 1237 (vs), 1177 (s), 1127 (s), 1061 (m), 1018 (m), 983 (s), 864 (m), 794 (m), 763 (m), 739 (m), 708 (s), 576 (m), 528 (m), 497 (m), 474 (m), 448 (m), 426 (m), 400 (m).

## II. NMR spectra

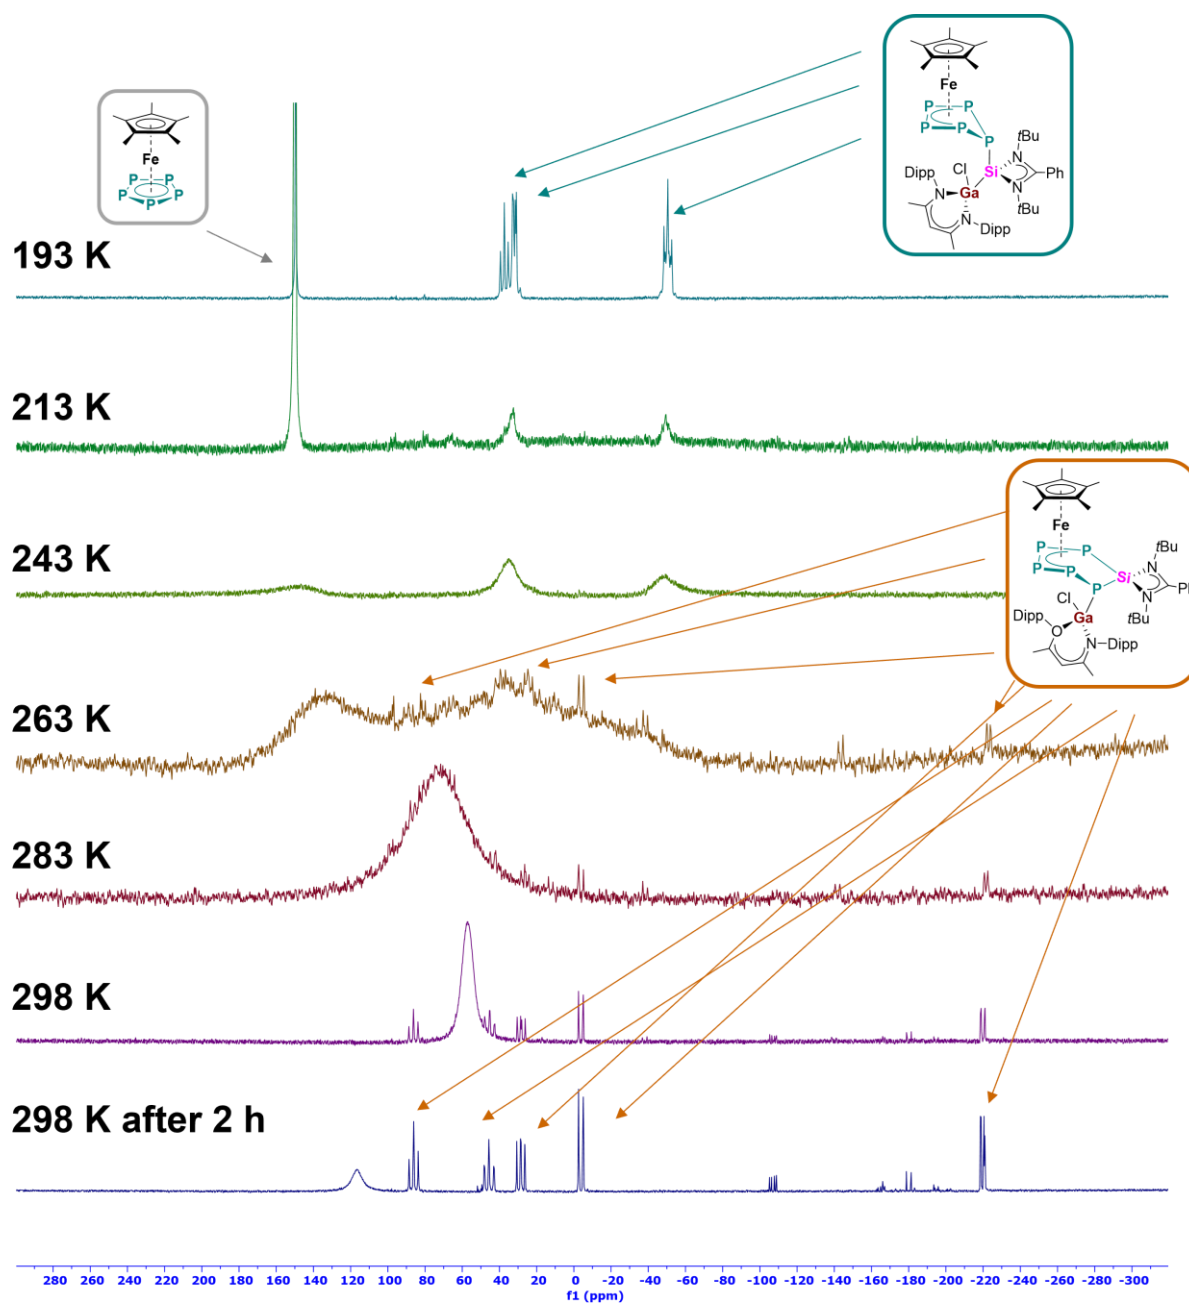

**Figure S1.** Variable temperature (from 193 K to 298 K)  $^{31}\text{P}\{^1\text{H}\}$  NMR (162 MHz, toluene- $d_8$ ) spectra of the reaction between  $[\text{Cp}^*\text{Fe}(\eta^5\text{-P}_5)]$  and  $[\text{L}^{\text{NacNac}}\text{Ga}(\text{Cl})\text{-SiL}^{\text{Ph}}]$  (1:1 molar ratio).

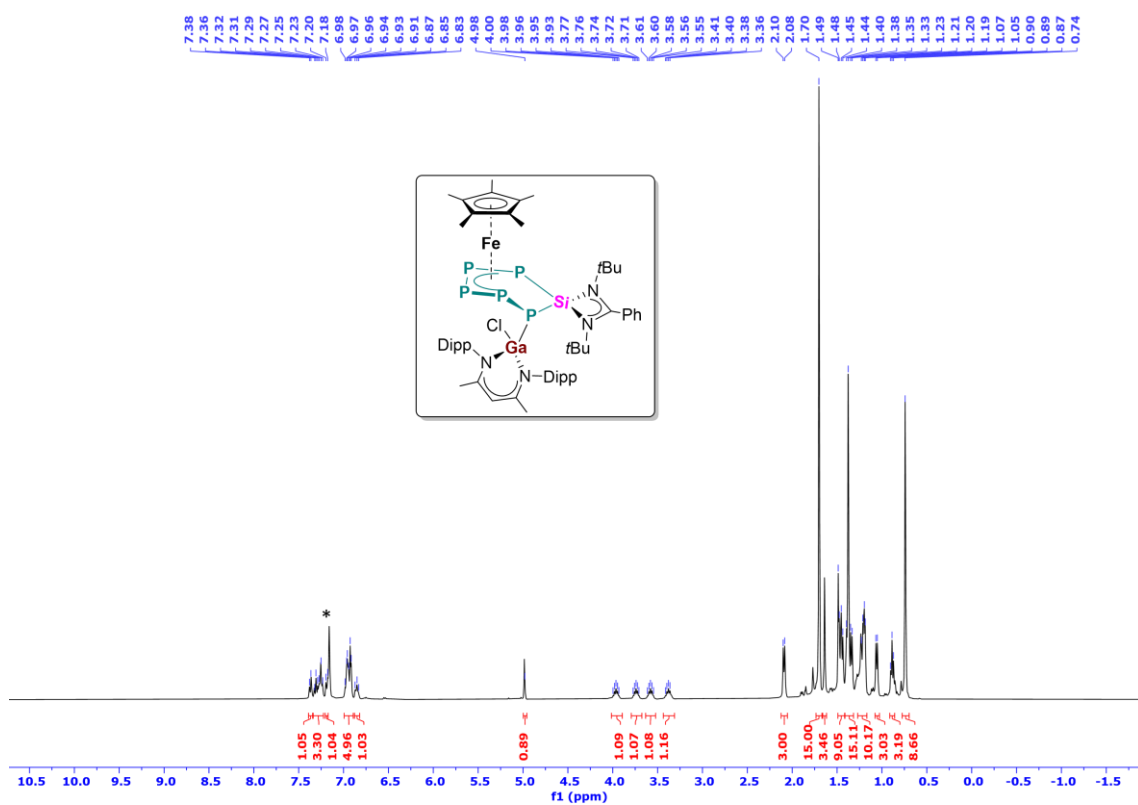

Figure S2.  $^1\text{H}$  NMR spectrum of compound **2** in  $\text{C}_6\text{D}_6$ , \*, residual protio solvent signal.

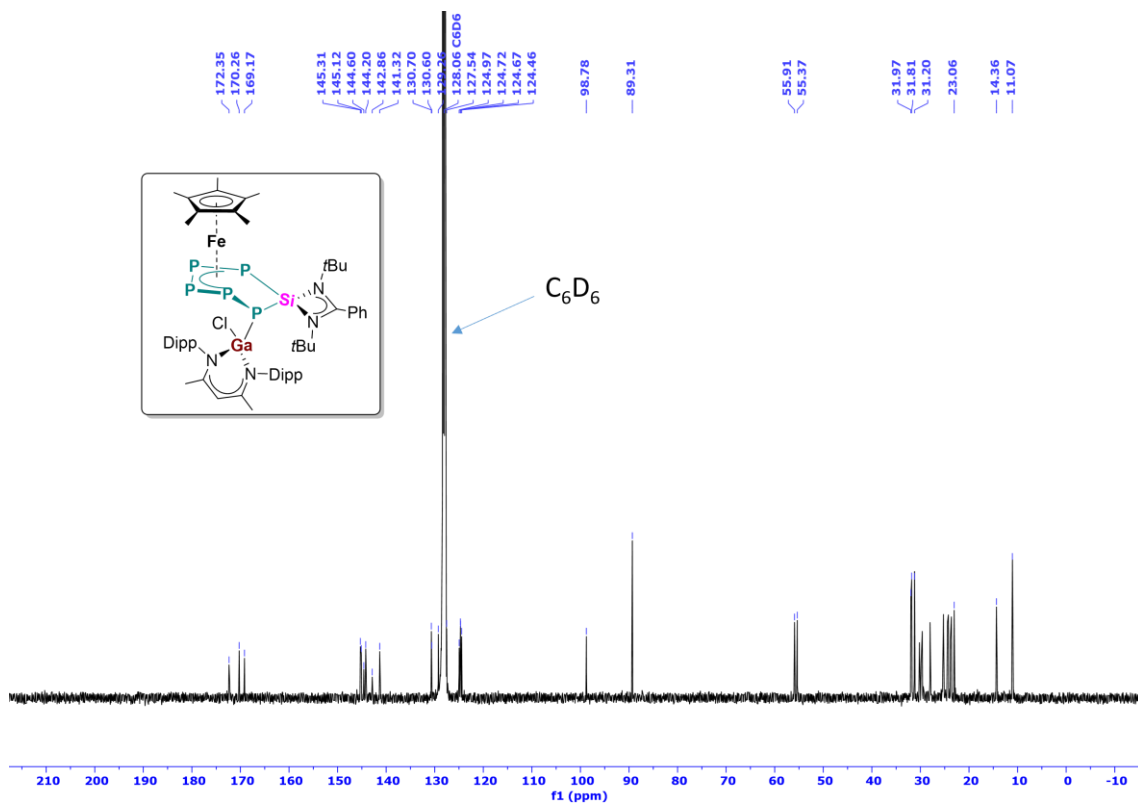

Figure S3.  $^{13}\text{C}\{^1\text{H}\}$  NMR spectrum of compound **2** in  $\text{C}_6\text{D}_6$ .

58.93  
57.07  
55.15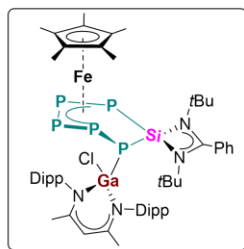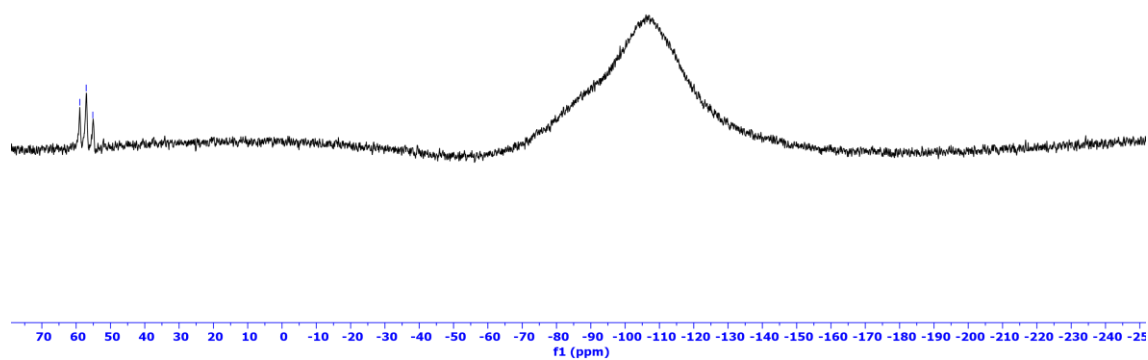

Figure S4.  $^{29}\text{Si}\{^1\text{H}\}$  NMR spectrum of compound **2** in  $\text{C}_6\text{D}_6$ .

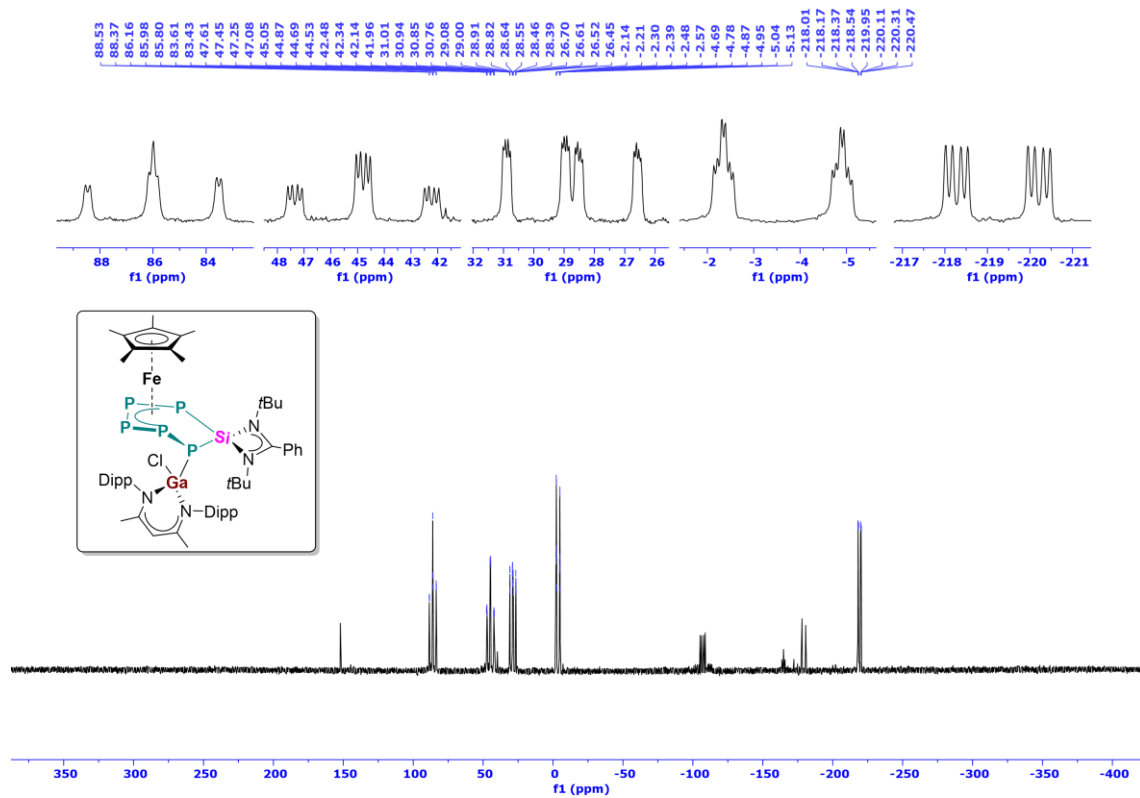

Figure S5.  $^{31}\text{P}\{^1\text{H}\}$  NMR spectrum of compound **2** in  $\text{C}_6\text{D}_6$ .

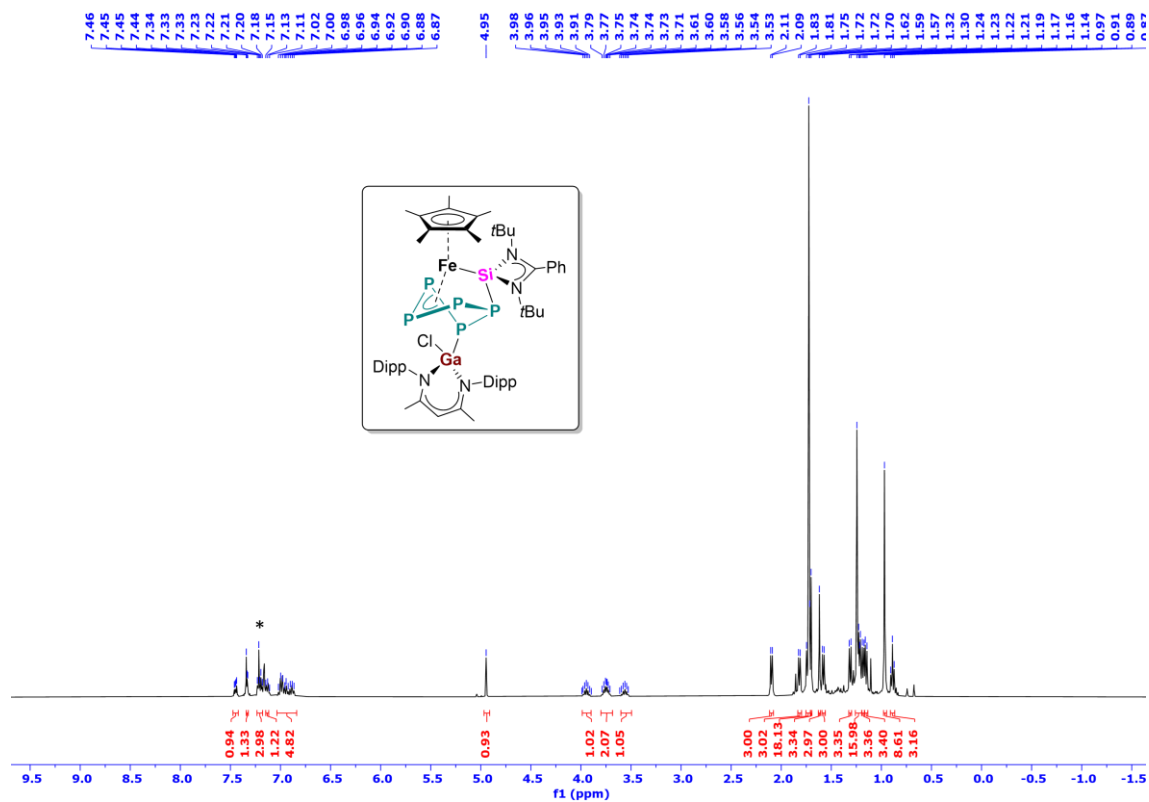

Figure S6.  $^1\text{H}$  NMR spectrum of compound **3** in  $\text{C}_6\text{D}_6$ , \*, residual protio solvent signal.

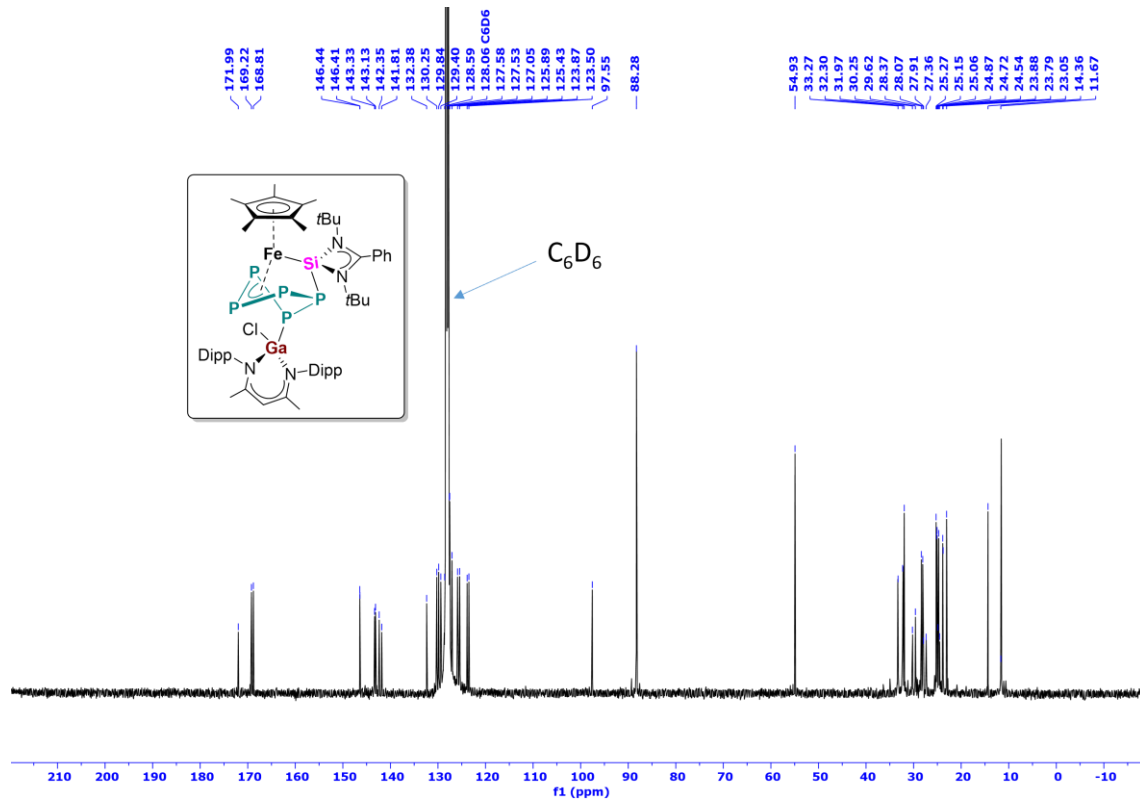

Figure S7.  $^{13}\text{C}\{^1\text{H}\}$  NMR spectrum of compound **3** in  $\text{C}_6\text{D}_6$ .

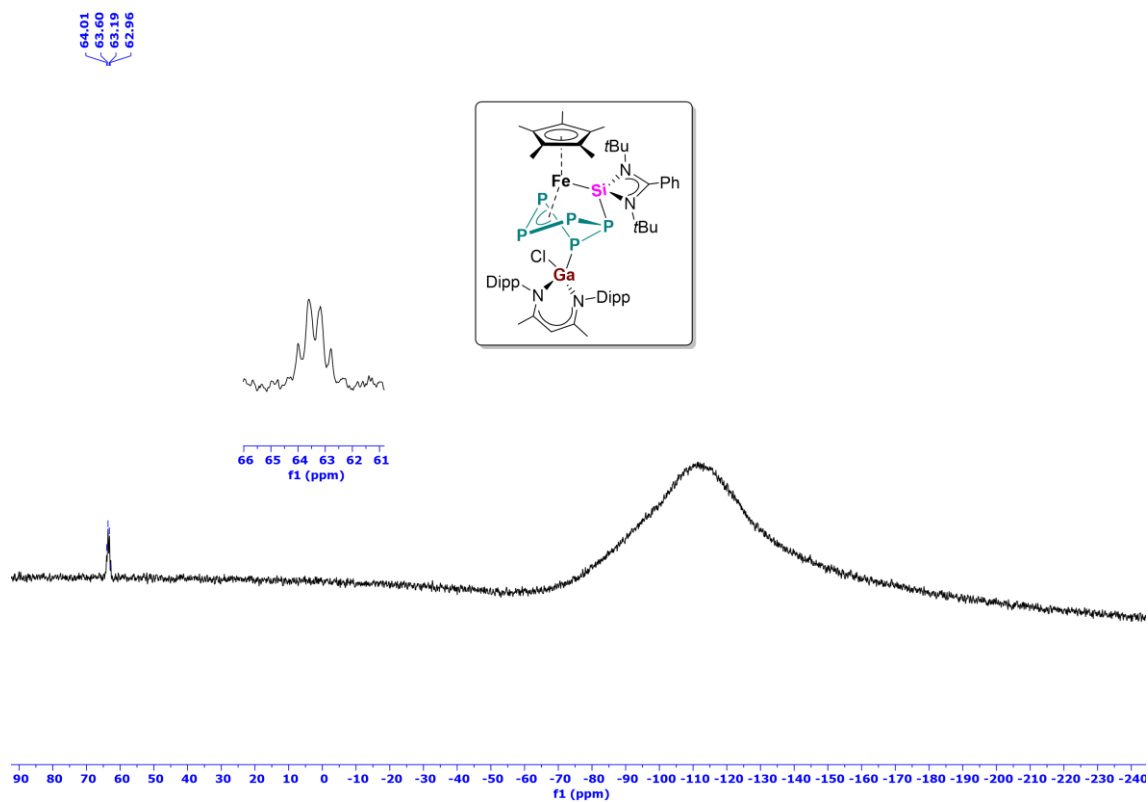

**Figure S8.**  $^{29}\text{Si}\{^1\text{H}\}$  NMR spectrum of compound **3** in  $\text{C}_6\text{D}_6$ .

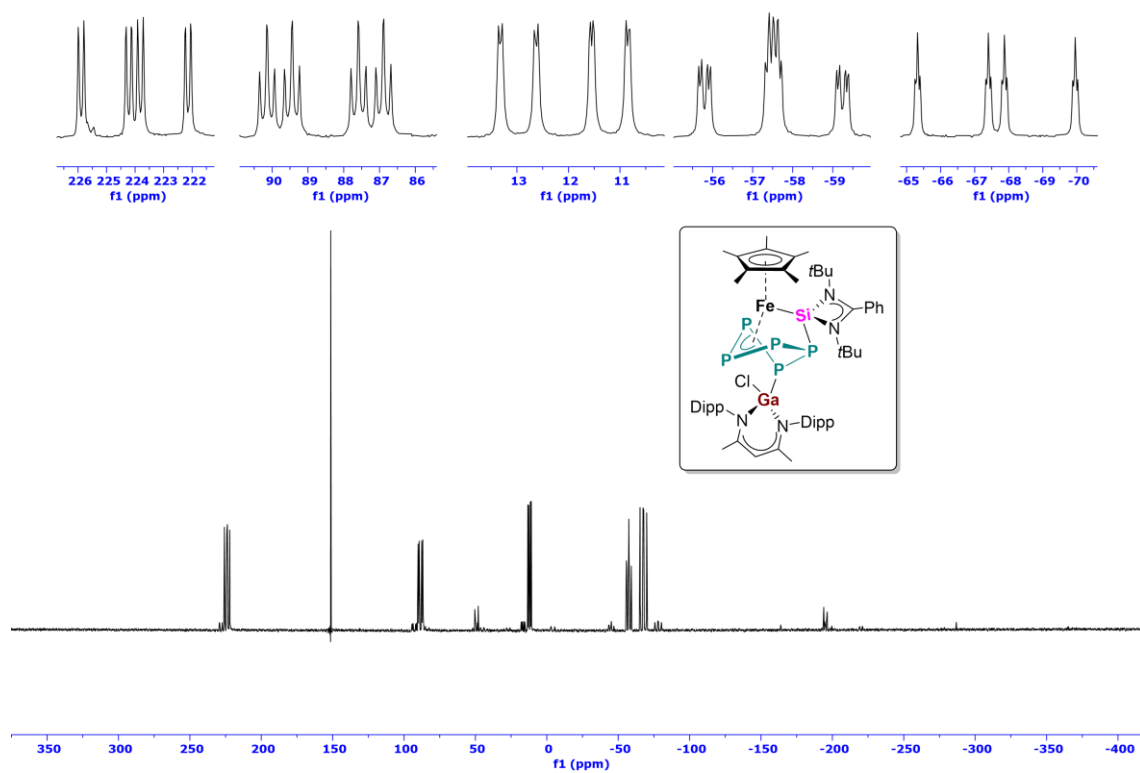

**Figure S9.**  $^{31}\text{P}\{^1\text{H}\}$  NMR spectrum of compound **3** in  $\text{C}_6\text{D}_6$ .



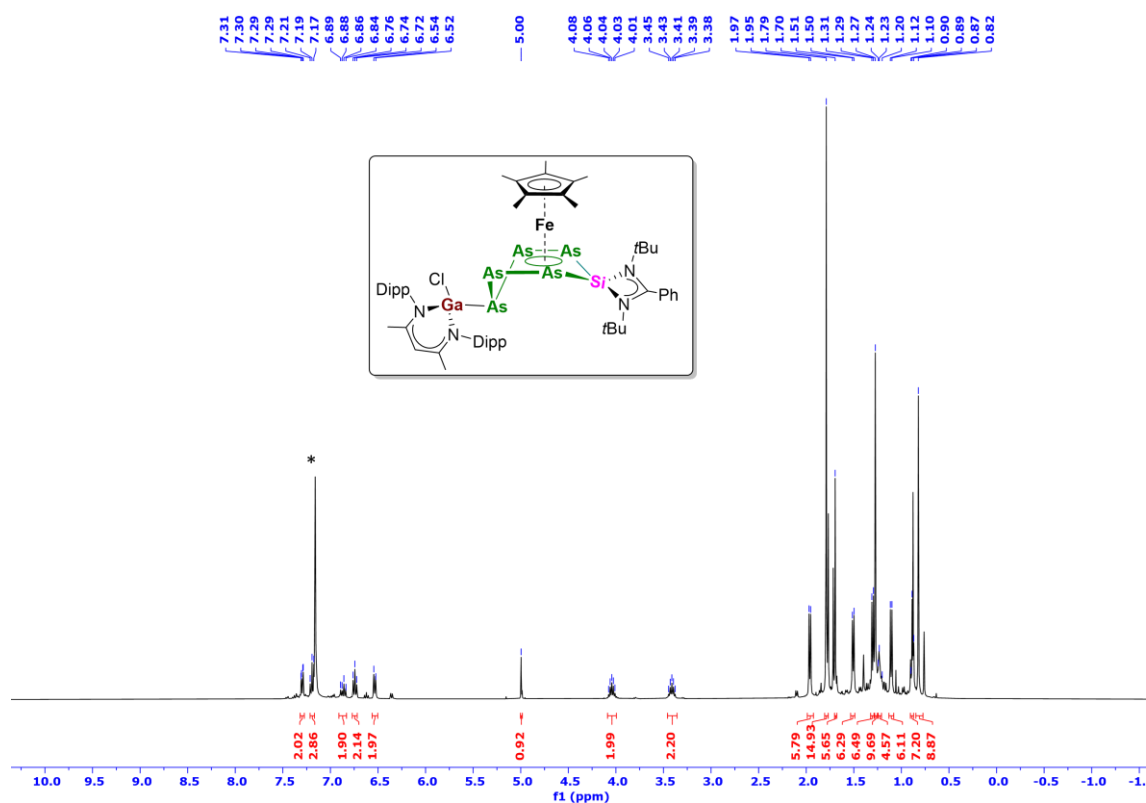

Figure S10.  $^1\text{H}$  NMR spectrum of compound **4** in  $\text{C}_6\text{D}_6$ , \*, residual protio solvent signal.

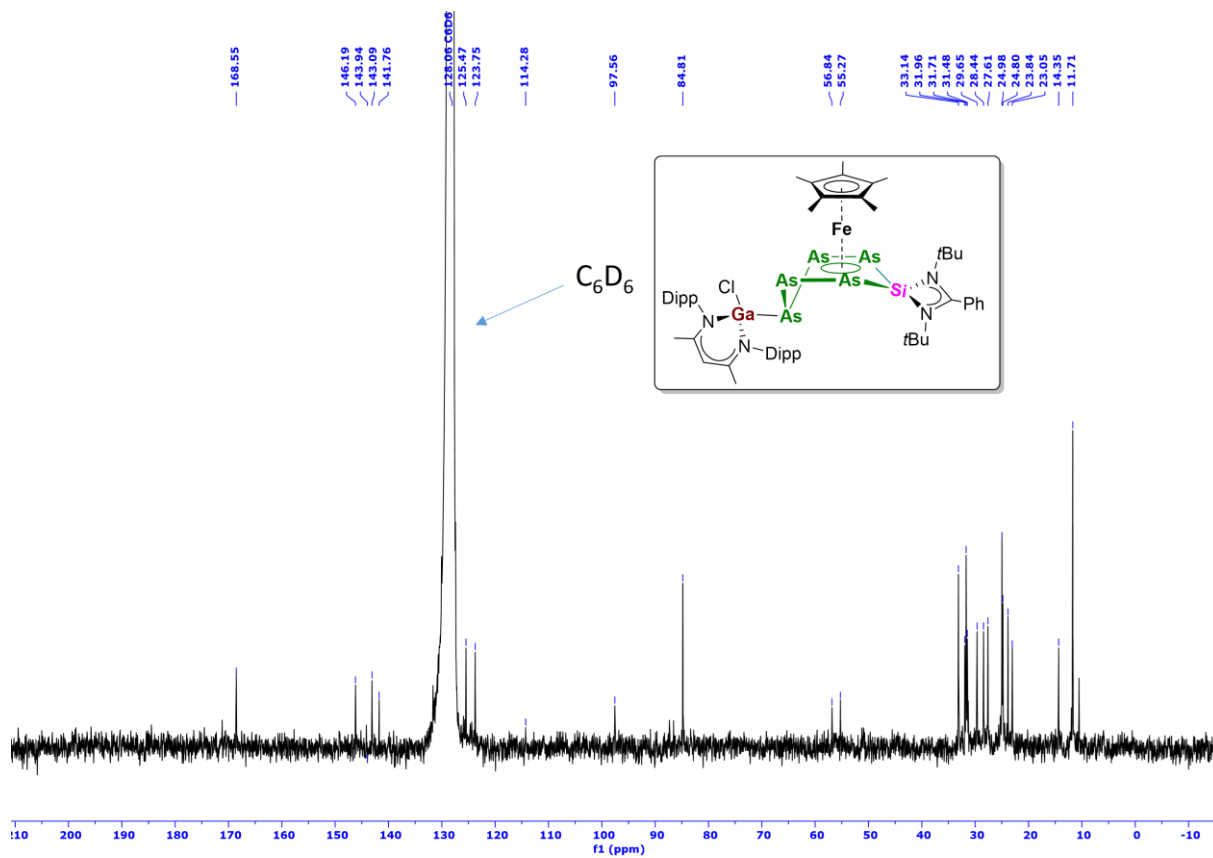

Figure S11.  $^{13}\text{C}\{^1\text{H}\}$  NMR spectrum of compound **4** in  $\text{C}_6\text{D}_6$ .

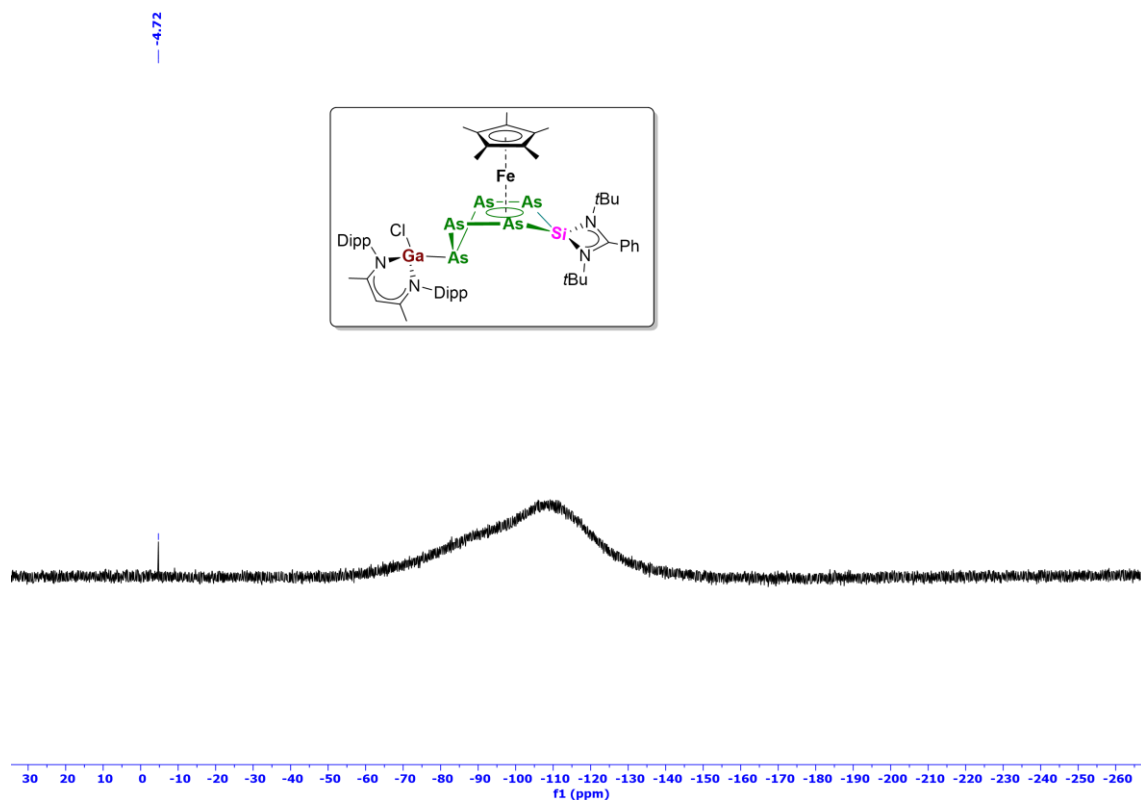

**Figure S12.**  $^{29}\text{Si}\{^1\text{H}\}$  NMR spectrum of compound **3** in  $\text{C}_6\text{D}_6$ .

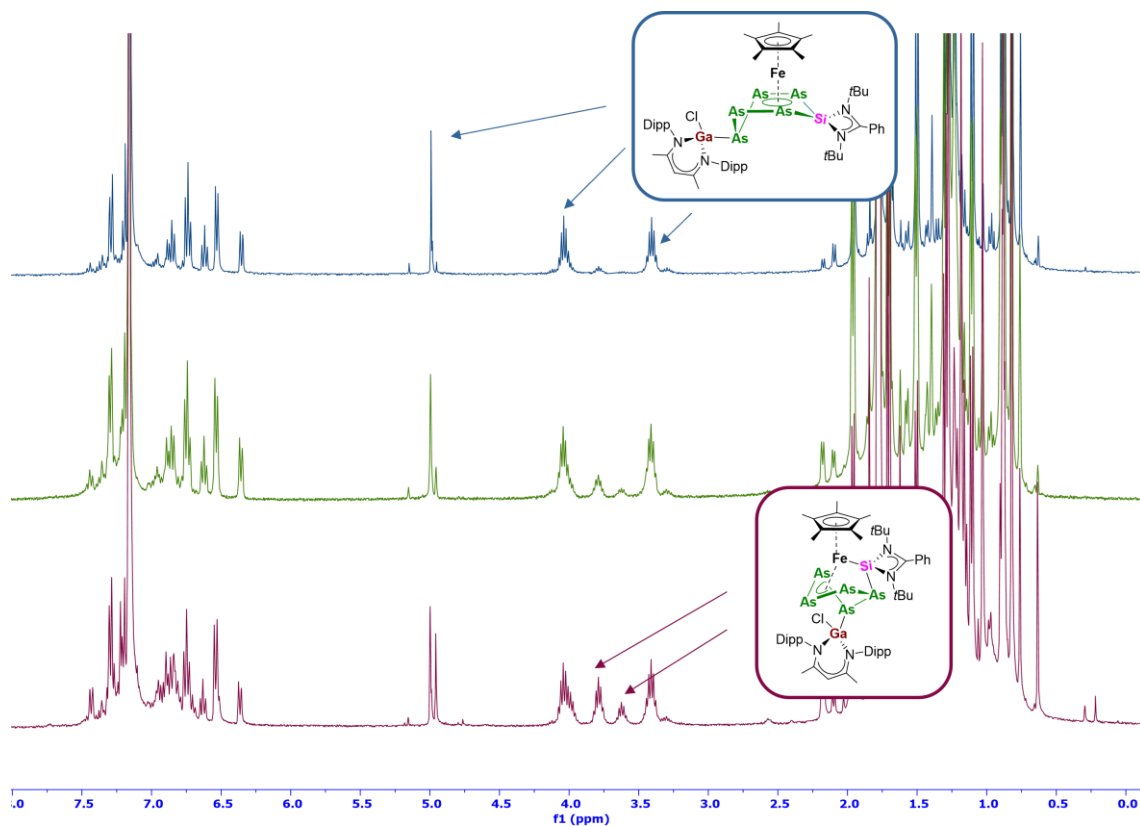

**Figure S13.**  $^1\text{H}$  NMR spectrum of compound **4** recorded after dissolving in  $\text{C}_6\text{D}_6$  (top), overnight (middle), after three days (bottom), showing complex **4** is unstable and already slowly isomerizes to **5** at room temperature.

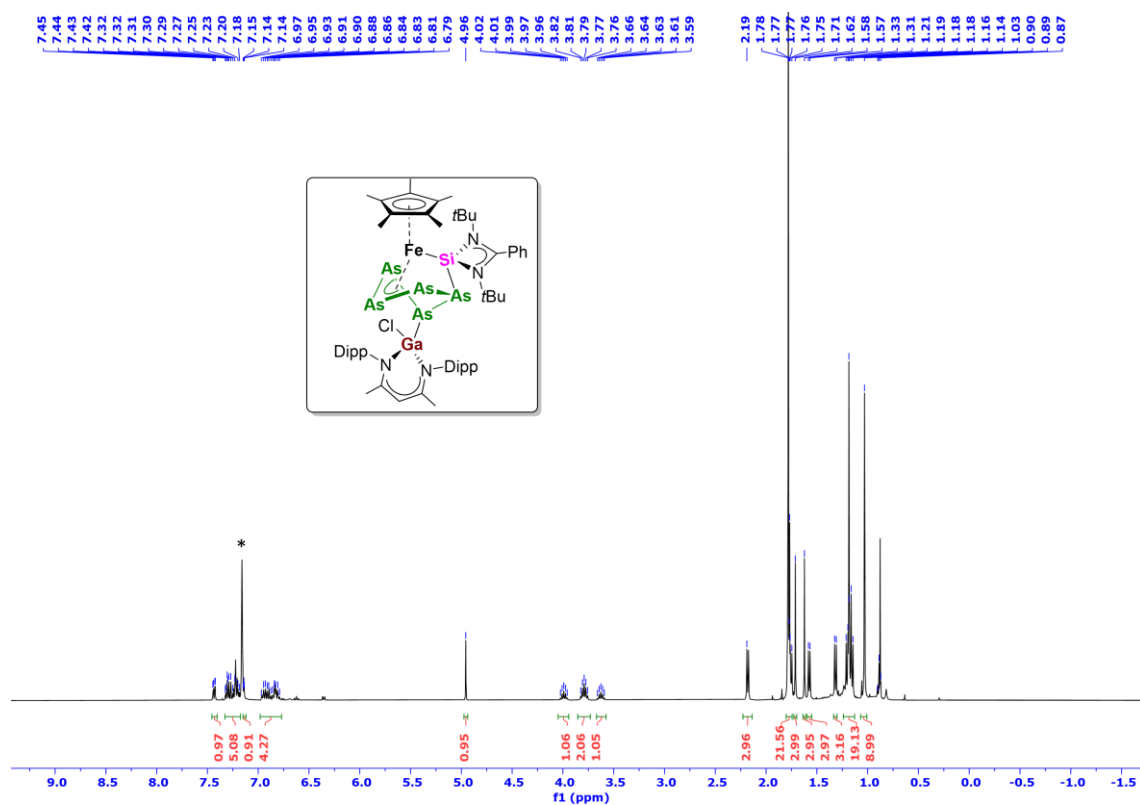

Figure S14. <sup>1</sup>H NMR spectrum of compound **5** in C<sub>6</sub>D<sub>6</sub>, \*, residual protio solvent signal.

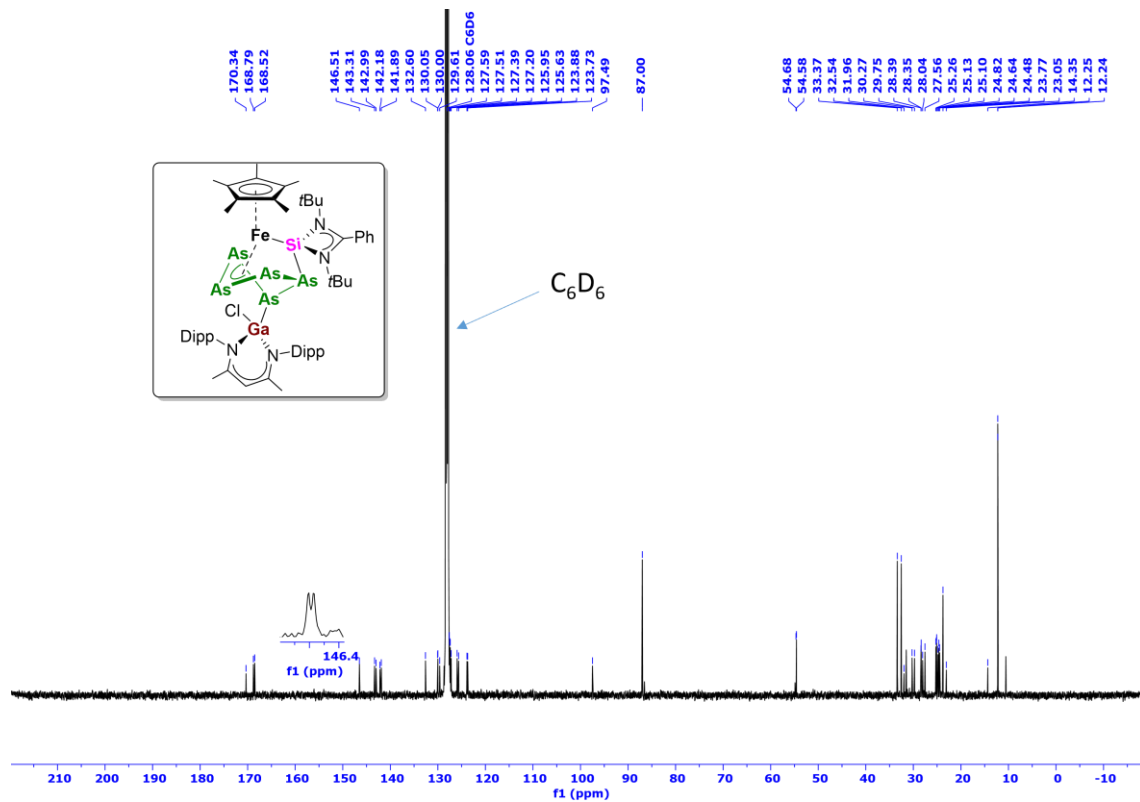

Figure S15. <sup>13</sup>C{<sup>1</sup>H} NMR spectrum of compound **5** in C<sub>6</sub>D<sub>6</sub>.

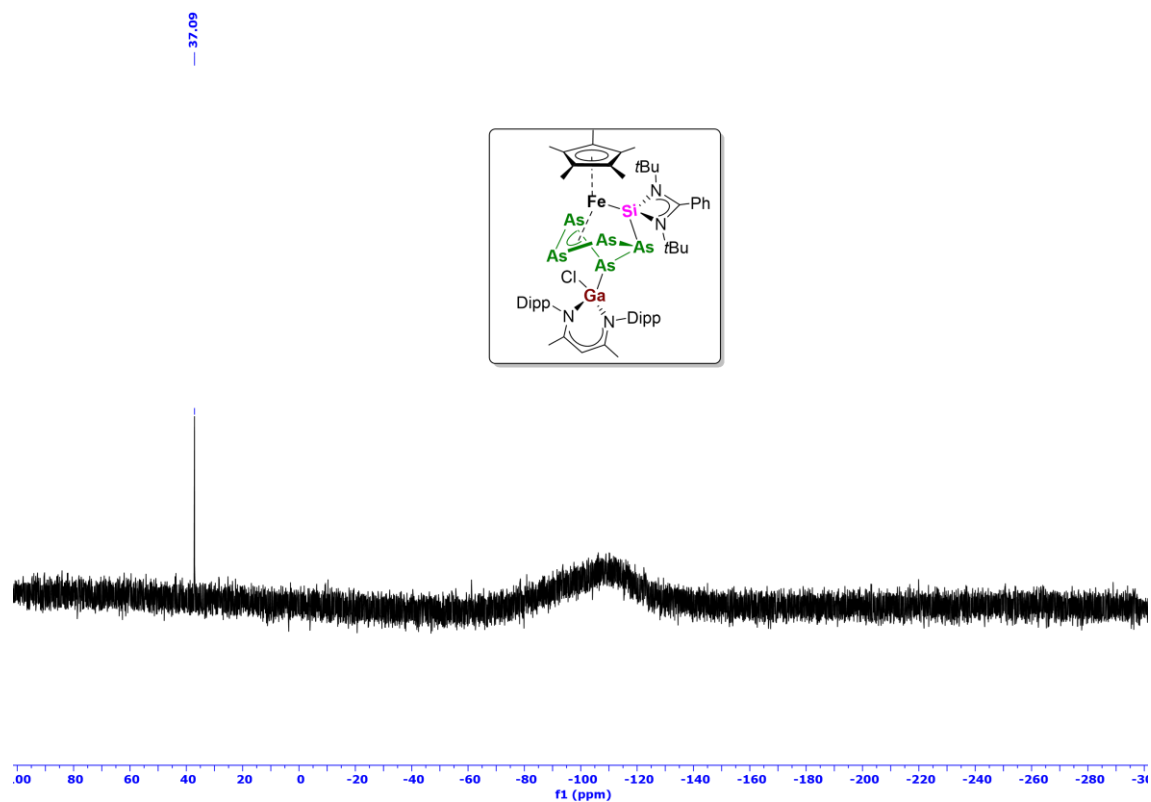

Figure S16.  $^{29}\text{Si}\{^1\text{H}\}$  NMR spectrum of compound 5 in  $\text{C}_6\text{D}_6$ .

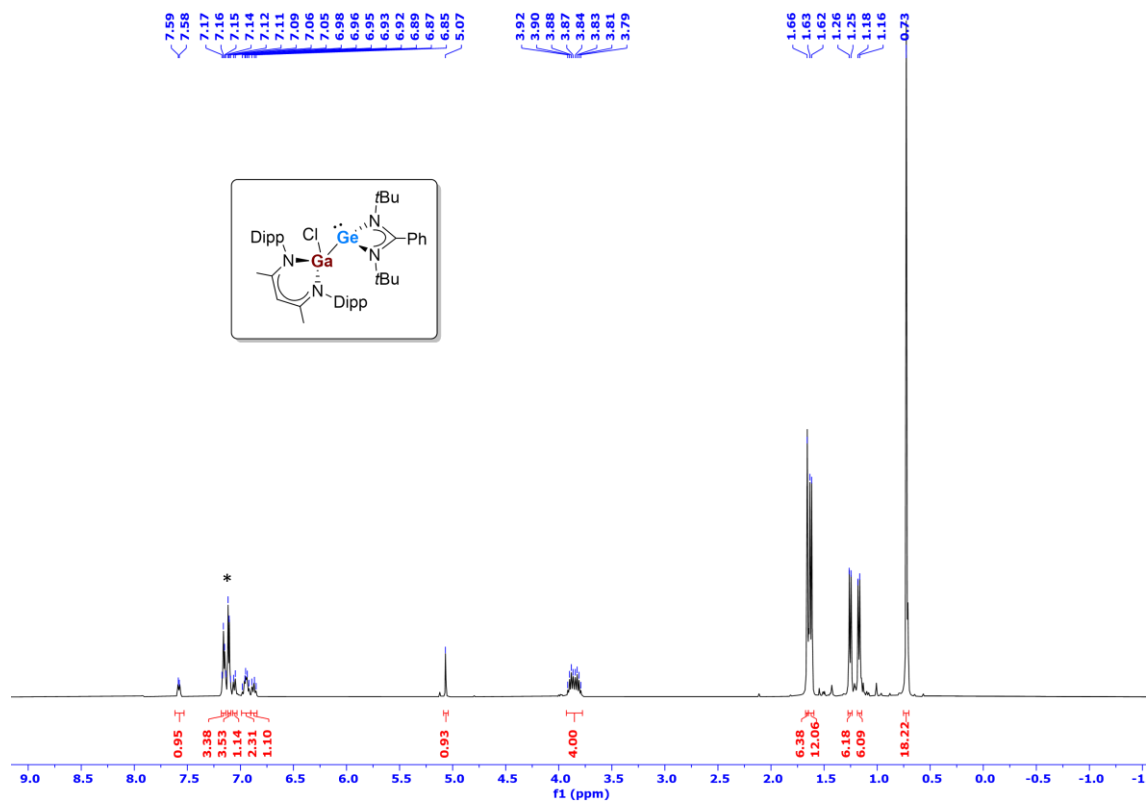

Figure S17.  $^1\text{H}$  NMR spectrum of compound 6 in  $\text{C}_6\text{D}_6$ , \*, residual protio solvent signal.

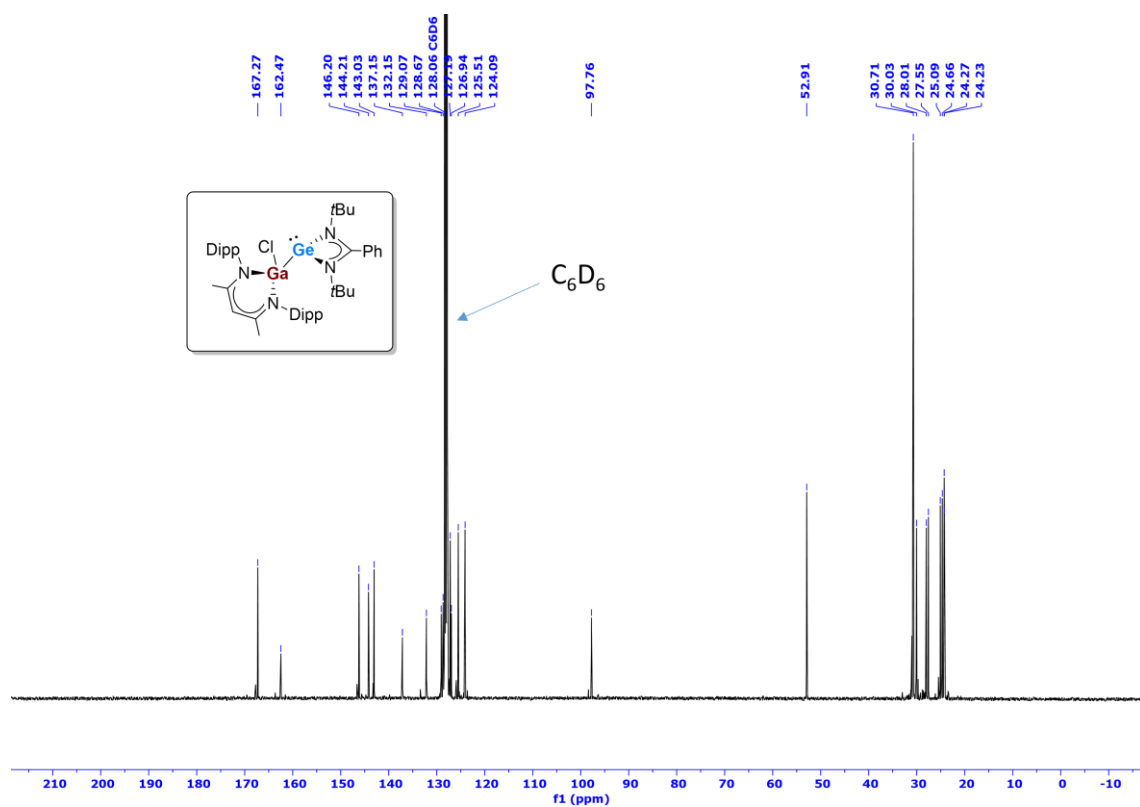

Figure S18.  $^{13}\text{C}\{^1\text{H}\}$  NMR spectrum of compound **6** in  $\text{C}_6\text{D}_6$ .

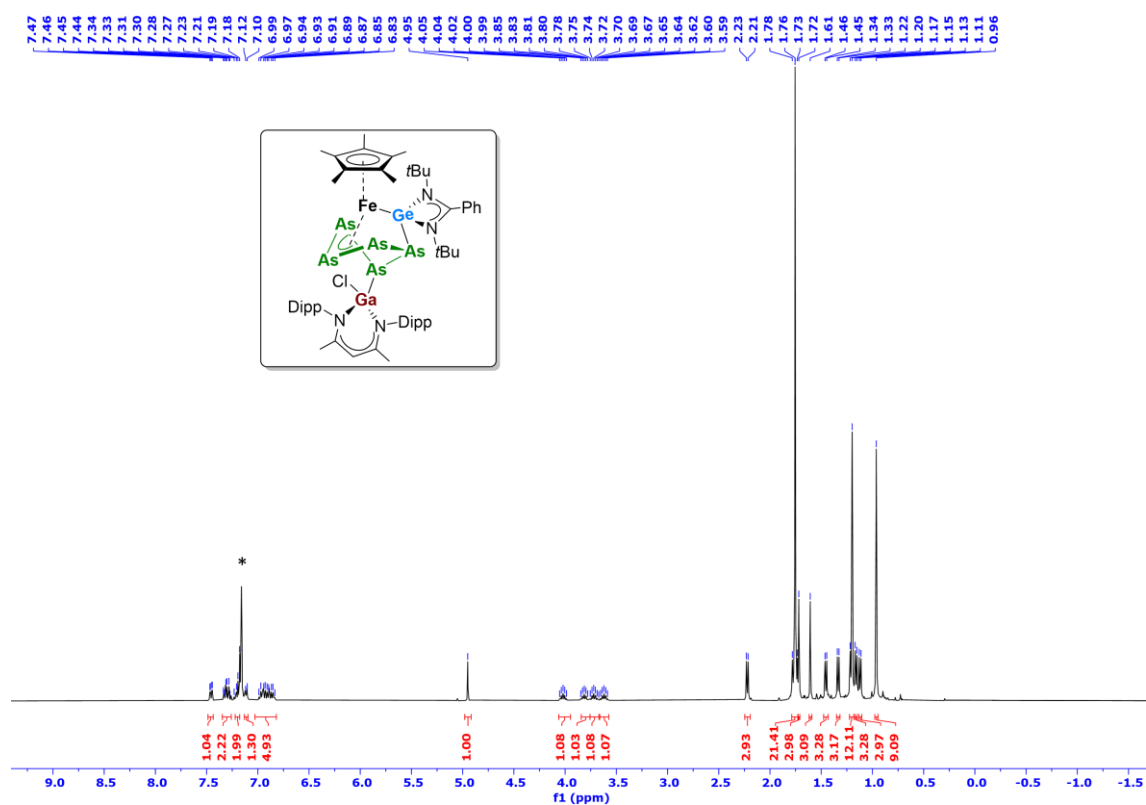

Figure S19.  $^1\text{H}$  NMR spectrum of compound **7** in  $\text{C}_6\text{D}_6$ , \*, residual protio solvent signal.

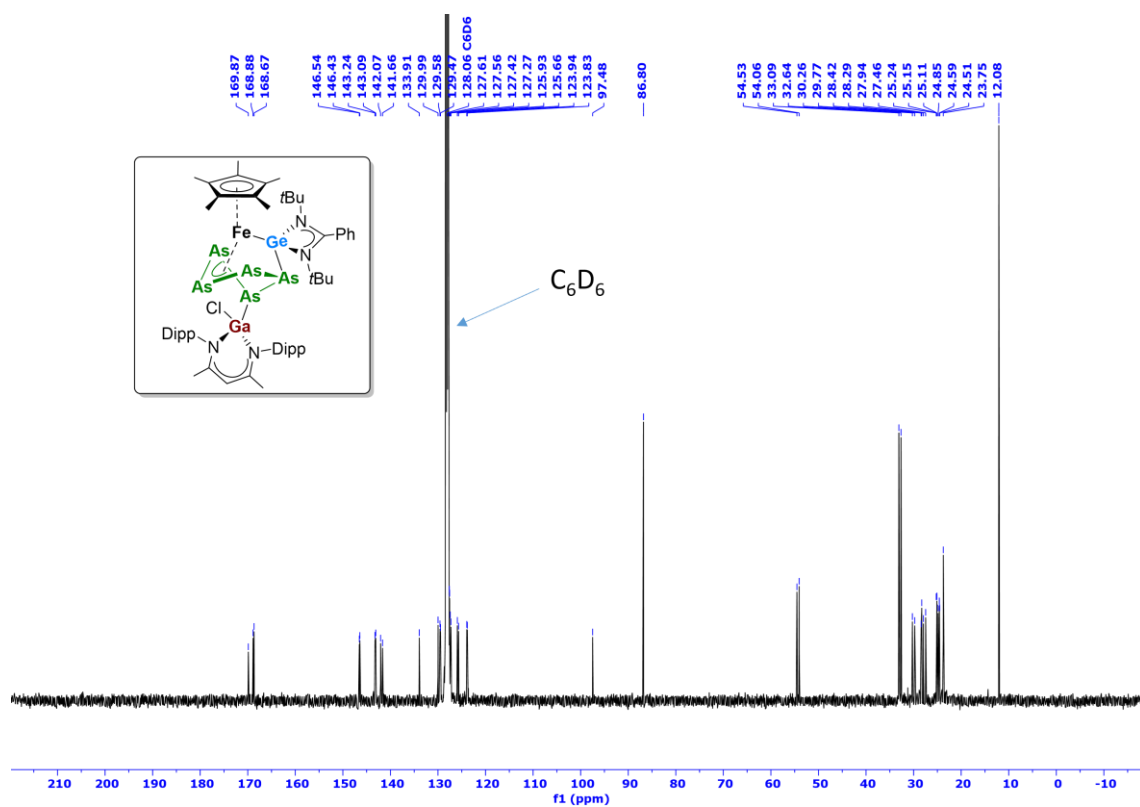

Figure S20.  $^{13}\text{C}\{^1\text{H}\}$  NMR spectrum of compound **7** in  $\text{C}_6\text{D}_6$ .

### III. Details of the simulation of the NMR spectra

Simulations of the  $^{31}\text{P}\{^1\text{H}\}$  NMR spectra were performed using *gNMR* NMR simulation software, version 5.0.6.0.<sup>[S6]</sup> The parameters chemical shifts ( $\delta$ ) and coupling constant ( $J$ ) for the simulation of the phosphorus NMR spectra are compiled in Table S1, S2 and S3.

#### III.1 Experimental and simulated spectra of **1** (at 193 K)

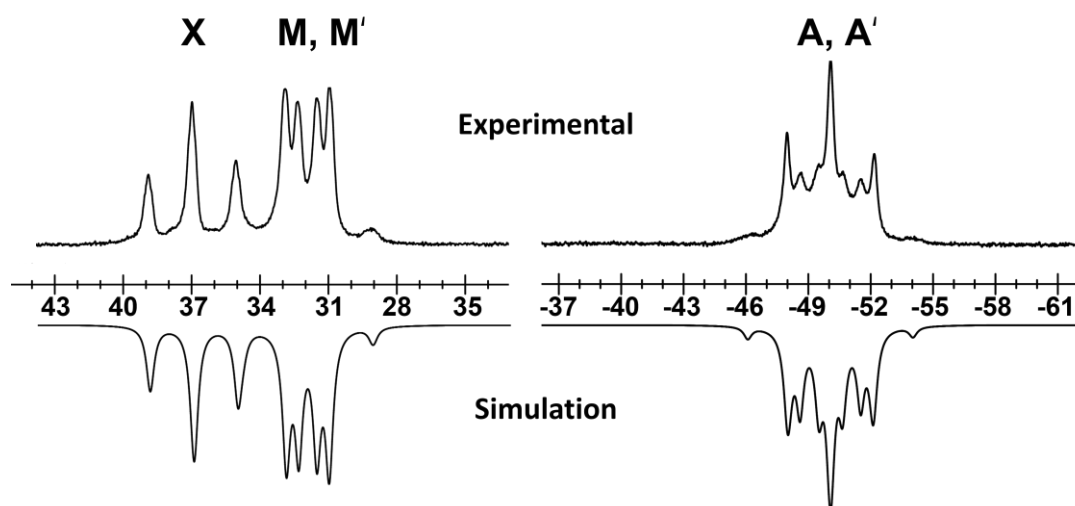

**Figure S21.**  $^{31}\text{P}\{^1\text{H}\}$  NMR spectrum (162.0 MHz, 193 K, toluene- $d_8$ ) of complex **1** with nuclei assigned to an AA'MM'X spin system; experimental (upwards) and simulation (downwards).

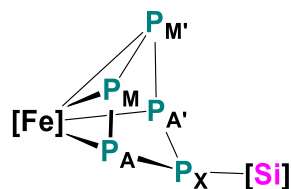

**Table S1.** Chemical shifts and couplings constants from the iterative fit of the AA'MM'X spin system of **1** and schematic representation of **1**. [Fe] = Cp\*Fe; [Si] = L<sup>Ph</sup>Si-Ga(Cl)L<sup>BDI</sup>.

| Parameters                                   | Iteration values |
|----------------------------------------------|------------------|
| $\delta(\text{P}_A) = \delta(\text{P}_{A'})$ | -50.6 ppm        |
| $\delta(\text{P}_M) = \delta(\text{P}_{M'})$ | 31.3 ppm         |
| $\delta(\text{P}_X)$                         | 37.4 ppm         |
| $^1J(\text{MM}')$                            | 422.9 Hz         |
| $^1J(\text{AM}) = ^1J(\text{A}'\text{M}')$   | 351.7 Hz         |
| $^1J(\text{AX}) = ^1J(\text{A}'\text{X})$    | 335.5 Hz         |
| $^2J(\text{A}'\text{M}) = ^2J(\text{AM}')$   | 22.8 Hz          |
| $^2J(\text{AA}')$                            | 0.6 Hz           |
| $^2J(\text{MX}) = ^2J(\text{M}'\text{X})$    | 0.7 Hz           |

III.2 Experimental and simulated spectra of **2**

## Experimental

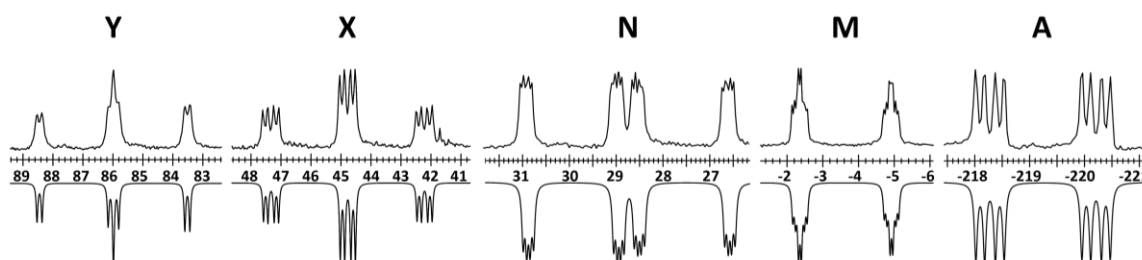

## Simulation

**Figure S22.**  $^{31}\text{P}\{^1\text{H}\}$  NMR spectrum (162 MHz, 298 K,  $\text{C}_6\text{D}_6$ ) of complex **2** with nuclei assigned to an AMNXY spin system; experimental (upwards) and simulation (downwards).

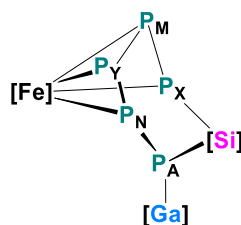

**Table S2.** Chemical shifts and couplings constants from the iterative fit of the AMNXY spin system of **2** and schematic representation of **2**. [Fe] =  $\text{Cp}^*\text{Fe}$ ; [Si] =  $\text{L}^{\text{Ph}}\text{Si}$ ; [Ga] =  $\text{Ga}(\text{Cl})\text{L}^{\text{BDI}}$ .

| Parameters           | Iteration values |
|----------------------|------------------|
| $\delta(\text{P}_A)$ | 85.9 ppm         |
| $\delta(\text{P}_M)$ | 44.8 ppm         |
| $\delta(\text{P}_N)$ | 28.8 ppm         |
| $\delta(\text{P}_X)$ | -3.6 ppm         |
| $\delta(\text{P}_Y)$ | -219.2 ppm       |
| $^1J(\text{AN})$     | 314.2 Hz         |
| $^1J(\text{NY})$     | 386.1 Hz         |
| $^1J(\text{YM})$     | 413.8 Hz         |
| $^1J(\text{MX})$     | 413.8 Hz         |
| $^2J(\text{AX})$     | 27.1 Hz          |
| $^2J(\text{XY})$     | 25.8 Hz          |
| $^2J(\text{AY})$     | 0.2 Hz           |
| $^3J(\text{AM})$     | 58.8 Hz          |
| $^3J(\text{MN})$     | 24.8 Hz          |
| $^3J(\text{NX})$     | 11.7 Hz          |



III.3 Experimental and simulated spectra of **3**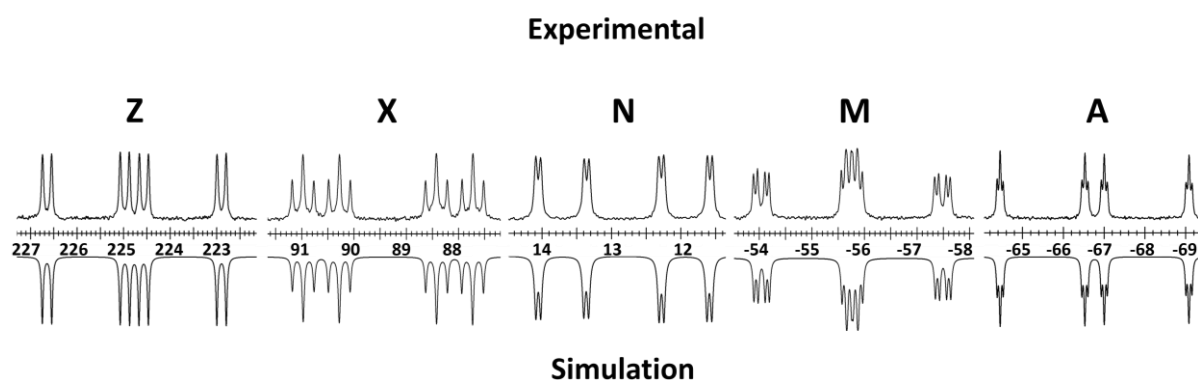

**Figure S23.**  $^{31}\text{P}\{^1\text{H}\}$  NMR spectrum (162 MHz, 298 K,  $\text{C}_6\text{D}_6$ ) of complex **3** with nuclei assigned to an AMNXZ spin system; experimental (upwards) and simulation (downwards).

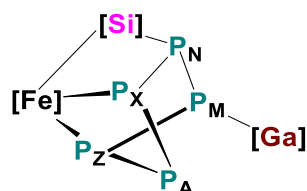

**Table S3.** Chemical shifts and couplings constants from the iterative fit of the AMNXZ spin system of **3** and schematic representation of **3**. [Fe] =  $\text{Cp}^*\text{Fe}$ ; [Si] =  $\text{L}^{\text{Ph}}\text{Si}$ ; [Ga] =  $\text{Ga}(\text{Cl})\text{L}^{\text{BDI}}$ .

| Parameters           | Iteration values |
|----------------------|------------------|
| $\delta(\text{P}_A)$ | -66.8 ppm        |
| $\delta(\text{P}_M)$ | -56.8 ppm        |
| $\delta(\text{P}_N)$ | 12.8 ppm         |
| $\delta(\text{P}_X)$ | 89.3 ppm         |
| $\delta(\text{P}_Z)$ | 224.8 ppm        |
| $^1J(\text{AX})$     | 413.4 Hz         |
| $^1J(\text{AZ})$     | 336.4 Hz         |
| $^1J(\text{MN})$     | 287.5 Hz         |
| $^1J(\text{MZ})$     | 271.2 Hz         |
| $^1J(\text{NX})$     | 111.8 Hz         |
| $^2J(\text{AN})$     | 11.3 Hz          |
| $^2J(\text{AM})$     | 13.0 Hz          |
| $^2J(\text{MX})$     | 34.5 Hz          |
| $^2J(\text{NZ})$     | 0.1 Hz           |
| $^2J(\text{XZ})$     | 32.8 Hz          |

## IV. IR spectra

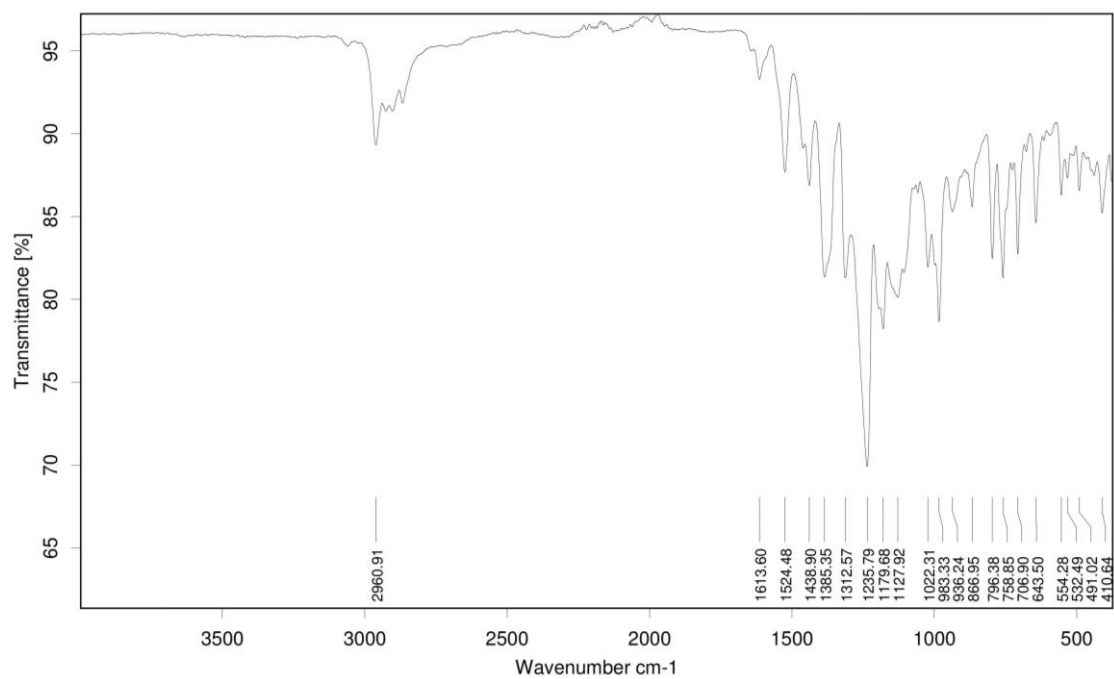

Figure S24. IR spectrum of complex 2.

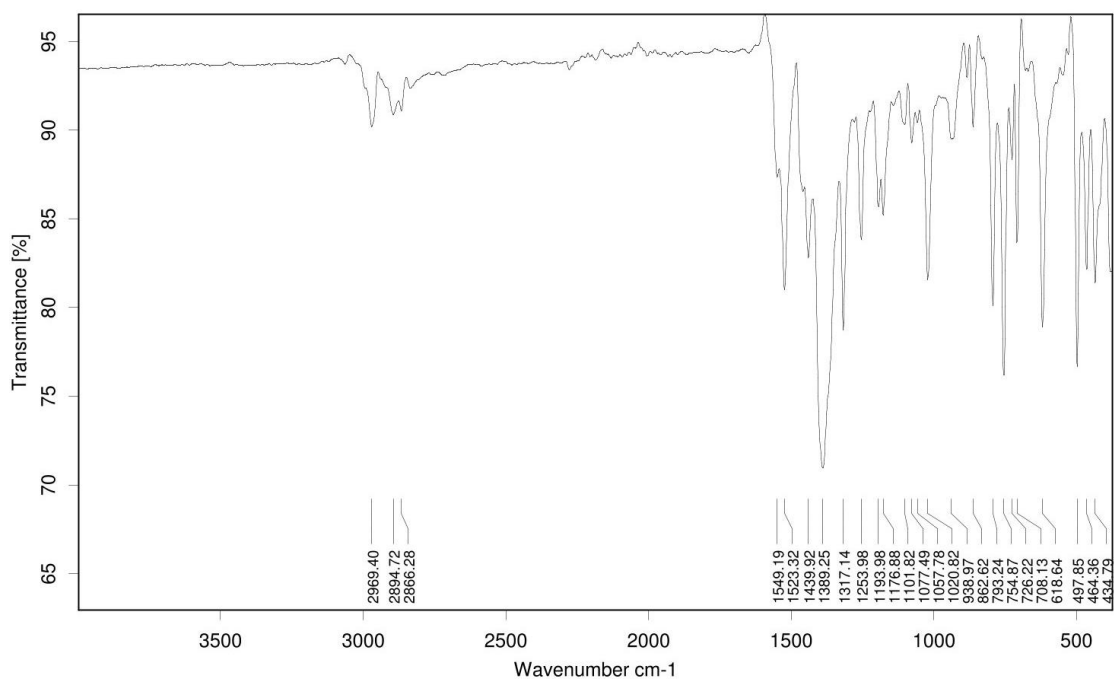

Figure S25. IR spectrum of complex 3.

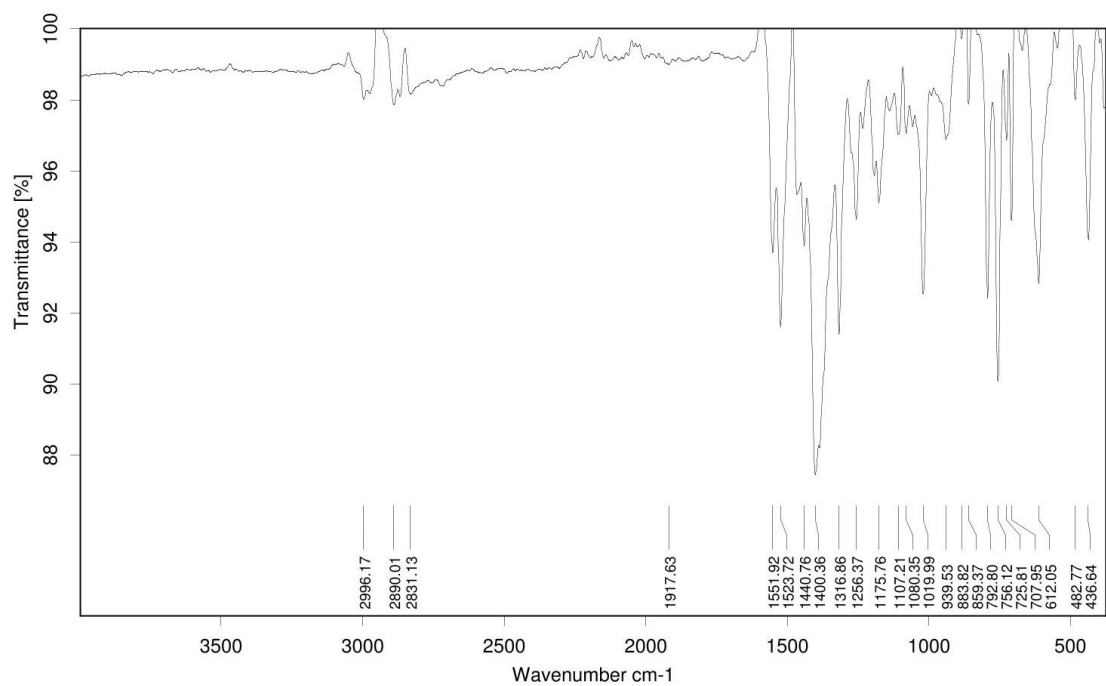

Figure S26. IR spectrum of complex 4.

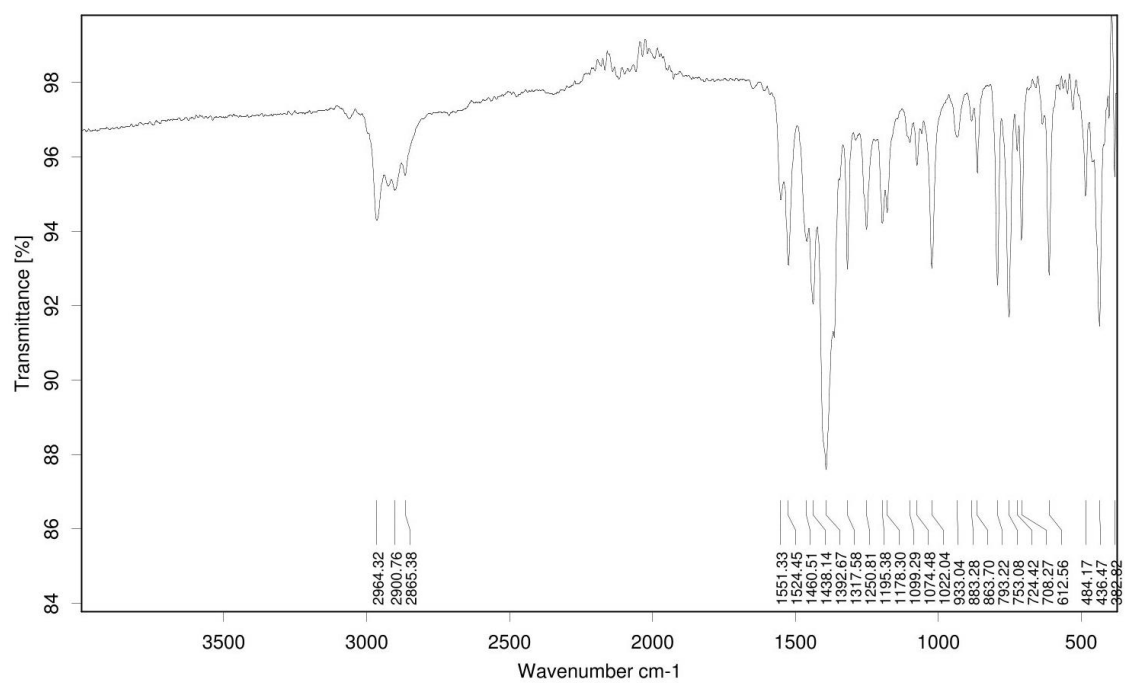

Figure S27. IR spectrum of complex 5.

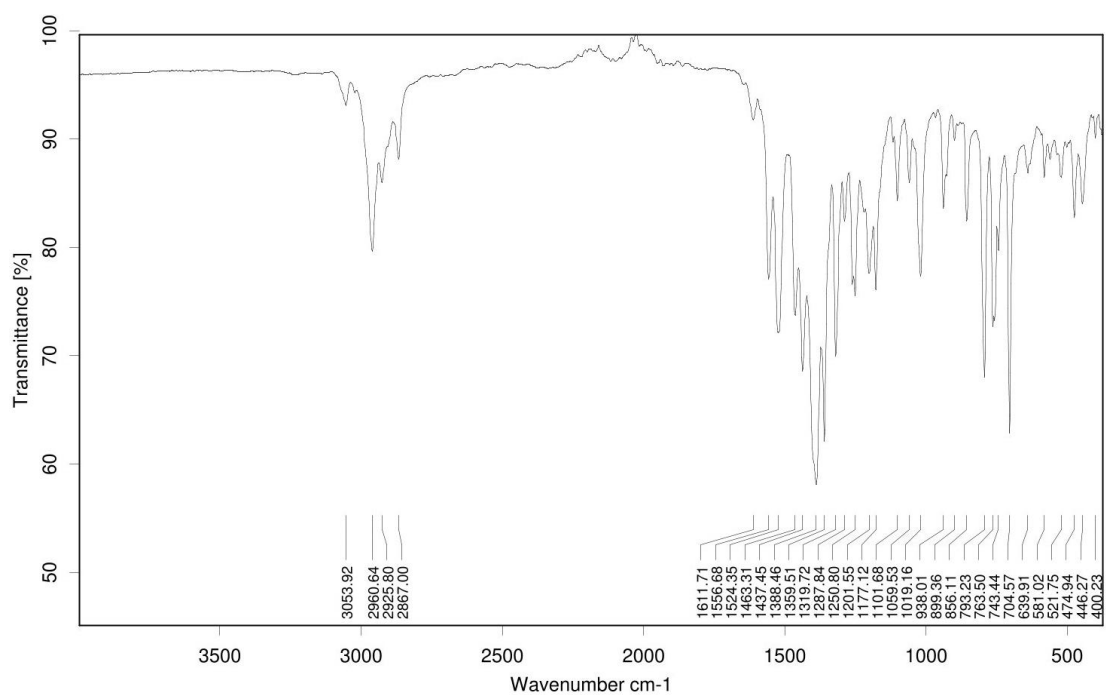

Figure S28. IR spectrum of complex 6.

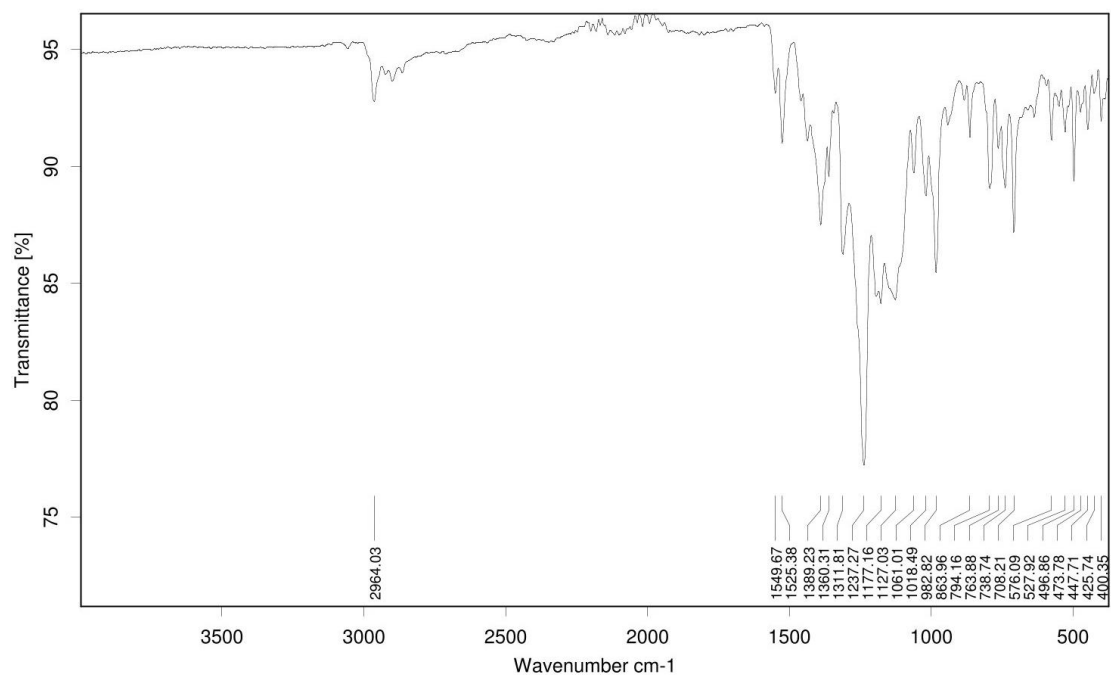

Figure S29. IR spectrum of complex 7.

## V. X-ray crystallography

### V.1 General methods

Suitable crystals for the X-ray analysis of all compounds were obtained as described above. A suitable crystal was covered in mineral oil (Aldrich) and mounted on a glass fibre. The crystal was transferred directly to the cold stream of a STOE StadiVari (100 K) diffractometer. All structures were solved by using the program SHELXS/T<sup>[S7,S8]</sup> and Olex2.<sup>[S9]</sup> The remaining non-hydrogen atoms were located from successive difference Fourier map calculations. The refinements were carried out by using full-matrix least-squares techniques on  $F_o^2$  by using the program SHELXL.<sup>[S7,S8]</sup> The H-atoms were introduced into the geometrically calculated positions (SHELXL procedures) unless otherwise stated and refined riding on the corresponding parent atoms. In each case, the locations of the largest peaks in the final difference Fourier map calculations, as well as the magnitude of the residual electron densities, were of no chemical significance. Specific comments for each data set are given below. Summary of the crystal data, data collection and refinement for compounds are given in Table S4.

Crystallographic data for the structures reported in this paper have been deposited with the Cambridge Crystallographic Data Centre as a supplementary publication no. CCDC 2225385-2225391. Copies of the data can be obtained free of charge on application to CCDC, 12 Union Road, Cambridge CB21EZ, UK (fax: +(44)1223-336-033; email: [deposit@ccdc.cam.ac.uk](mailto:deposit@ccdc.cam.ac.uk)).

The following special comments were applied to the models of the structures:

- For the refinement of compound **1**, solvent mask was used to treat the solvent region, and the removed electron density (126 electrons per asymmetric unit) is consistent with three benzene molecules.
- In the crystal structure of compound **3**, in one of the two molecules, the two Dipp groups are disordered over two positions occupancy ratios of 0.38/0.62 and 0.41/0.59, respectively. The L<sup>Ph</sup>Si moiety is disordered over two positions with an occupancy ratio of 0.19/0.81, the FeP<sub>5</sub> moiety is disordered over three positions with an occupancy ratio of 0.73/0.11/0.16 and the Cp\* fragment is disordered over three positions with an occupancy ratio of 0.45/0.35/0.11.
- In the crystal structure of compound **4**, one *i*Pr group is disordered over two positions with an occupancy ratio of 0.55/0.45.
- In the crystal structure of compound **7**, in one of the two molecules, one Cp\* group is disordered over two positions with an occupancy ratio of 0.55/0.45. The co-crystallized C6D6 molecule is disordered over two positions with an occupancy ratio of 0.39/0.61.

## V.2 Summary of crystal data

Table S4.

| Compounds                                                                              | 1                                                                      | 2                                                                                                        | 3                                                                                                           | 4                                                                                                             | 5                                                                                                             | 6                                                    | 7                                                                       |
|----------------------------------------------------------------------------------------|------------------------------------------------------------------------|----------------------------------------------------------------------------------------------------------|-------------------------------------------------------------------------------------------------------------|---------------------------------------------------------------------------------------------------------------|---------------------------------------------------------------------------------------------------------------|------------------------------------------------------|-------------------------------------------------------------------------|
| Chemical formula                                                                       | C <sub>54</sub> H <sub>79</sub> ClFeGaN <sub>4</sub> P <sub>5</sub> Si | C <sub>54</sub> H <sub>79</sub> ClFeGaN <sub>4</sub> P <sub>5</sub> Si (C <sub>6</sub> H <sub>14</sub> ) | C <sub>54</sub> H <sub>79</sub> ClFeGaN <sub>4</sub> P <sub>5</sub> Si (0.5 C <sub>6</sub> D <sub>6</sub> ) | C <sub>54</sub> H <sub>79</sub> ClFeGaN <sub>4</sub> As <sub>5</sub> Si (0.5 C <sub>6</sub> H <sub>14</sub> ) | C <sub>54</sub> H <sub>79</sub> ClFeGaN <sub>4</sub> As <sub>5</sub> Si (0.5 C <sub>6</sub> H <sub>14</sub> ) | C <sub>44</sub> H <sub>64</sub> ClGaGeN <sub>4</sub> | C <sub>54</sub> H <sub>79</sub> ClFeGaN <sub>4</sub> As <sub>5</sub> Ge |
| CCDC Number                                                                            | 2225385                                                                | 2225386                                                                                                  | 2225387                                                                                                     | 2225388                                                                                                       | 2225389                                                                                                       | 2225390                                              | 2225391                                                                 |
| Formula Mass                                                                           | 1128.17                                                                | 1214.34                                                                                                  | 1167.22                                                                                                     | 1391.00                                                                                                       | 1391.00                                                                                                       |                                                      |                                                                         |
| Radiation type                                                                         | MoK $\alpha$                                                           | MoK $\alpha$                                                                                             | MoK $\alpha$                                                                                                | MoK $\alpha$                                                                                                  | MoK $\alpha$                                                                                                  | MoK $\alpha$                                         | MoK $\alpha$                                                            |
| Wavelength/Å                                                                           | 0.71073                                                                | 0.71073                                                                                                  | 0.71073                                                                                                     | 0.71073                                                                                                       | 0.71073                                                                                                       | 0.71073                                              | 0.71073                                                                 |
| Crystal system                                                                         | monoclinic                                                             | orthorhombic                                                                                             | monoclinic                                                                                                  | triclinic                                                                                                     | monoclinic                                                                                                    | triclinic                                            | monoclinic                                                              |
| <i>a</i> /Å                                                                            | 20.5768(7)                                                             | 26.1402(8)                                                                                               | 37.7246(8)                                                                                                  | 13.5496(7)                                                                                                    | 15.3662(10)                                                                                                   | 10.233(2)                                            | 37.8546(6)                                                              |
| <i>b</i> /Å                                                                            | 16.8498(4)                                                             | 17.8110(4)                                                                                               | 16.1228(2)                                                                                                  | 15.4580(8)                                                                                                    | 17.8212(14)                                                                                                   | 12.188(2)                                            | 16.4222(2)                                                              |
| <i>c</i> /Å                                                                            | 22.4111(8)                                                             | 27.9689(6)                                                                                               | 19.9295(4)                                                                                                  | 16.9929(9)                                                                                                    | 23.9686(14)                                                                                                   | 18.128(6)                                            | 19.9888(4)                                                              |
| $\alpha$ /°                                                                            |                                                                        |                                                                                                          |                                                                                                             | 91.392(4)                                                                                                     |                                                                                                               | 83.16(2)                                             |                                                                         |
| $\beta$ /°                                                                             | 102.858(3)                                                             |                                                                                                          | 96.801(2)                                                                                                   | 107.271(4)                                                                                                    | 106.448(5)                                                                                                    | 75.84(2)                                             | 96.7960(10)                                                             |
| $\gamma$ /°                                                                            |                                                                        |                                                                                                          |                                                                                                             | 110.499(4)                                                                                                    |                                                                                                               | 74.80(2)                                             |                                                                         |
| Unit cell volume/Å <sup>3</sup>                                                        | 7575.4(4)                                                              | 13021.8(6)                                                                                               | 12036.4(4)                                                                                                  | 3150.6(3)                                                                                                     | 6295.1(8)                                                                                                     | 2112.0(10)                                           | 12338.8(3)                                                              |
| Temperature/K                                                                          | 100                                                                    | 100                                                                                                      | 100                                                                                                         | 100                                                                                                           | 100                                                                                                           | 100                                                  | 100                                                                     |
| Space group                                                                            | <i>P</i> 2 <sub>1</sub> / <i>n</i>                                     | <i>Pbca</i>                                                                                              | <i>P</i> 2 <sub>1</sub> / <i>c</i>                                                                          | <i>P</i> $\bar{1}$                                                                                            | <i>P</i> 2 <sub>1</sub> / <i>c</i>                                                                            | <i>P</i> $\bar{1}$                                   | <i>P</i> 2 <sub>1</sub> / <i>c</i>                                      |
| <i>Z</i>                                                                               | 4                                                                      | 8                                                                                                        | 8                                                                                                           | 2                                                                                                             | 4                                                                                                             | 2                                                    | 8                                                                       |
| Absorption coefficient $\mu$ /mm <sup>-1</sup>                                         | 0.733                                                                  | 0.857                                                                                                    | 0.925                                                                                                       | 3.362                                                                                                         | 3.366                                                                                                         | 1.447                                                | 3.890                                                                   |
| No. of reflections measured                                                            | 55507                                                                  | 42559                                                                                                    | 78223                                                                                                       | 47817                                                                                                         | 61060                                                                                                         | 22665                                                | 84634                                                                   |
| No. of independent reflections                                                         | 14803                                                                  | 13952                                                                                                    | 23569                                                                                                       | 13020                                                                                                         | 12319                                                                                                         | 8285                                                 | 22519                                                                   |
| <i>R</i> <sub>int</sub>                                                                | 0.0401                                                                 | 0.0268                                                                                                   | 0.0423                                                                                                      | 0.0359                                                                                                        | 0.0274                                                                                                        | 0.0319                                               | 0.0353                                                                  |
| Final <i>R</i> <sub>1</sub> values ( <i>I</i> > 2 $\sigma$ ( <i>I</i> ))               | 0.0633                                                                 | 0.0399                                                                                                   | 0.0612                                                                                                      | 0.0343                                                                                                        | 0.0309                                                                                                        | 0.0437                                               | 0.0568                                                                  |
| Final <i>wR</i> ( <i>F</i> <sup>2</sup> ) values ( <i>I</i> > 2 $\sigma$ ( <i>I</i> )) | 0.1505                                                                 | 0.0934                                                                                                   | 0.1182                                                                                                      | 0.0761                                                                                                        | 0.0602                                                                                                        | 0.1167                                               | 0.1377                                                                  |
| Final <i>R</i> <sub>1</sub> values (all data)                                          | 0.0776                                                                 | 0.0638                                                                                                   | 0.1118                                                                                                      | 0.0567                                                                                                        | 0.0463                                                                                                        | 0.0513                                               | 0.0824                                                                  |
| Final <i>wR</i> ( <i>F</i> <sup>2</sup> ) values (all data)                            | 0.1587                                                                 | 0.1035                                                                                                   | 0.1395                                                                                                      | 0.0825                                                                                                        | 0.0658                                                                                                        | 0.1228                                               | 0.1574                                                                  |
| Goodness of fit on <i>F</i> <sup>2</sup>                                               | 1.045                                                                  | 1.022                                                                                                    | 1.055                                                                                                       | 1.028                                                                                                         | 1.052                                                                                                         | 1.049                                                | 1.046                                                                   |

## V.3 Crystal structures

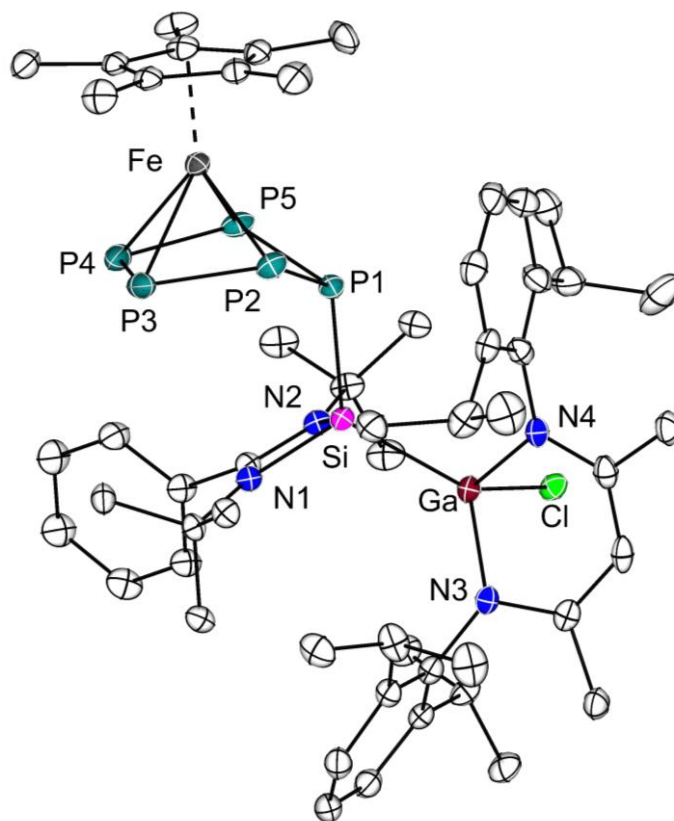

**Figure S30.** Molecular structure of the complex **1** in the solid state with thermal ellipsoids at 30% level. Selected bond distances [Å] and angles [°]: Ga–Si 2.4293(11), P1–P2 2.1583(15), P2–P3 2.148(2), P3–P4 2.133(2), P4–P5 2.145(2), P1–P5 2.1682(14), P1–Si 2.2516(14), Fe–P2 2.3096(12), Fe–P3 2.3305(13), Fe–P4 2.3245(13), Fe–P5 2.3063(12); P1–P2–P3 109.04(6), P2–P3–P4 103.87(6), P3–P4–P5 104.41(7), P4–P5–P1 108.56(6), P2–P1–P5 94.68(6).

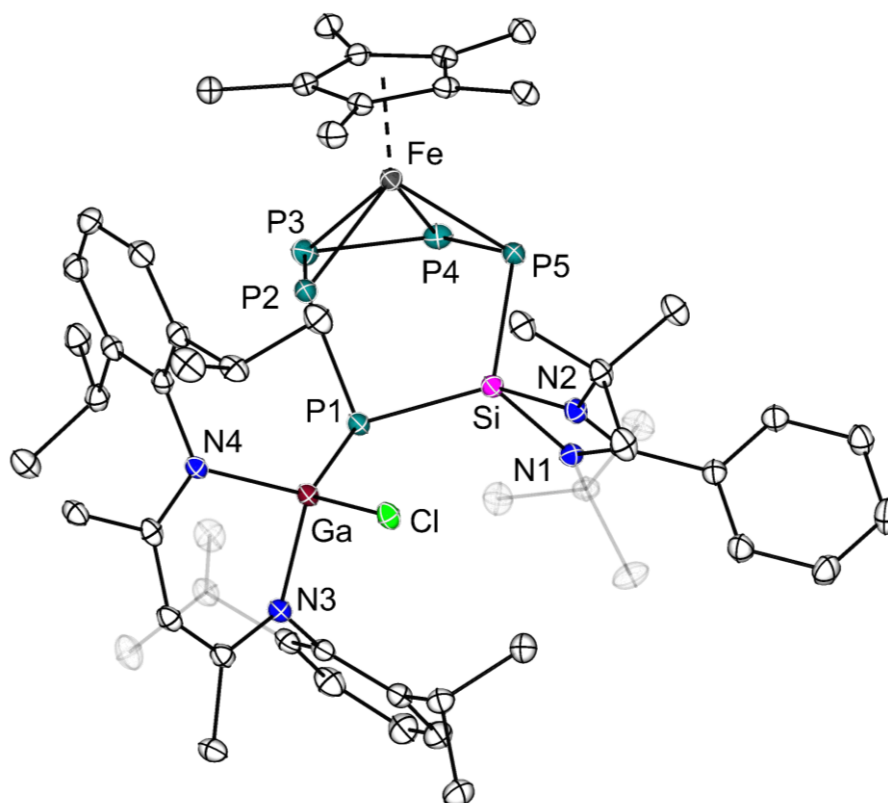

**Figure S31.** Molecular structure of the complex **2** in the solid state with thermal ellipsoids at 30% level. Selected bond distances [Å] and angles [°]: P1–P2 2.2403(9), P2–P3 2.1467(10), P3–P4 2.1619(10), P4–P5 2.1565(10), Si–P1 2.1771(9), Si–P5 2.1985(9), Ga–P1 2.3062(7), Fe–P2 2.2653(7), Fe–P3 2.3266(8), Fe–P4 2.3471(7), Fe–P5 2.2595(7); P1–P2–P3 100.56(4), P2–P3–P4 105.26(4), P3–P4–P5 108.18(4), P4–P5–Si 106.33(4), P1–Si–P5 113.40(4), Si–P1–P2 95.90(3).



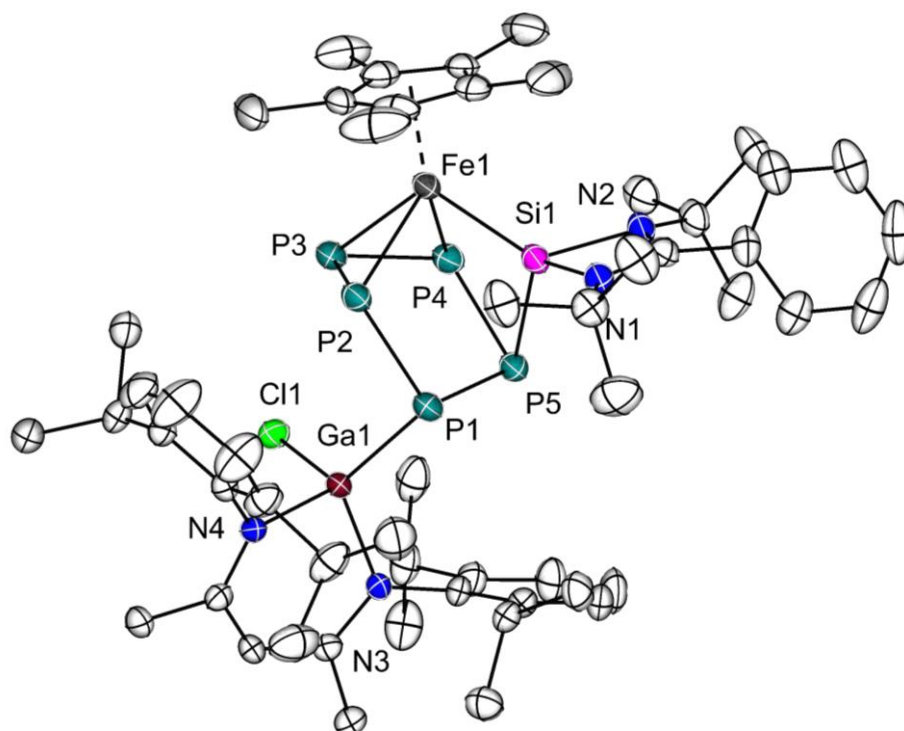

**Figure S32.** Molecular structure of the complex **3** in the solid state with thermal ellipsoids at 30% level. Two molecules are found in the asymmetric unit, only one of them is depicted here. Selected bond distances [ $\text{\AA}$ ] and angles [ $^\circ$ ]: Ga1–Cl1 2.2108(11), Ga1–P1 2.3117(12), Fe1–Si1 2.2081(14), Si1–P5 2.255(2), P1–P2 2.218(2), P2–P3 2.149(2), P3–P4 2.111(2), P4–P5 2.318(2), P1–P5 2.187(2); P2–P1–P5 101.74(5), P1–P2–P3 103.72(7), P2–P3–P4 99.07(7), P3–P4–P5 107.78(6), P4–P5–P1 102.12(6).

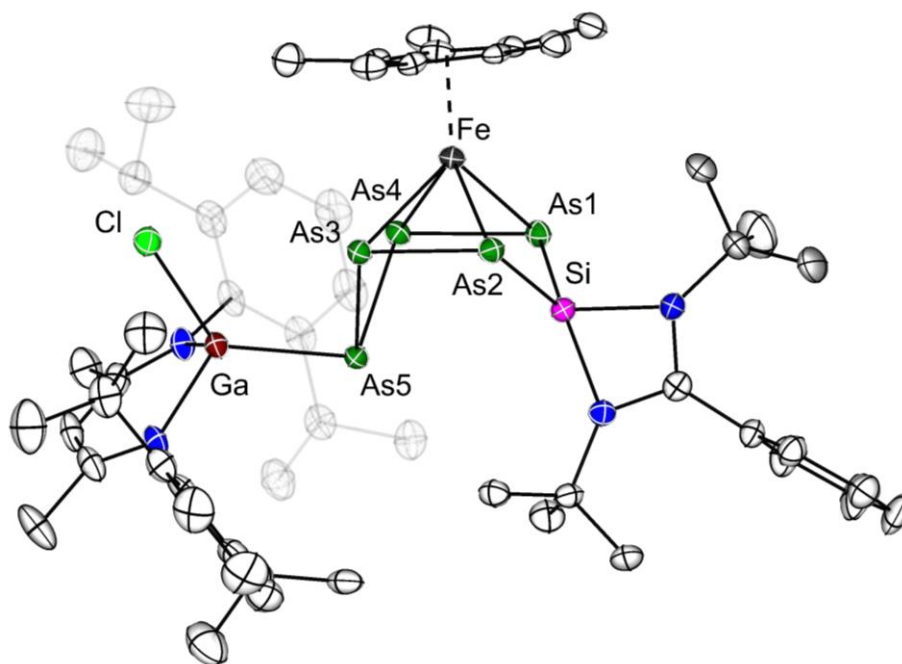

**Figure S33.** Molecular structure of the complex **4** in the solid state with thermal ellipsoids at 30% level. Selected bond distances [Å] and angles [°]: Si–As1 2.2787(10), Si–As2 2.2985(9), As1–As4 2.3764(5), As2–As3 2.3623(5), As3–As5 2.4563(4), As4–As5 2.4641(5), Ga–As5 2.4046(5); As1–Si–As2 105.00(4), Si–As1–As4 102.03(3), Si–As2–As3 105.34(3), As2–As3–As5 103.27(2), As1–As4–As5 107.12(2), As3–As5–As4 74.030(14).

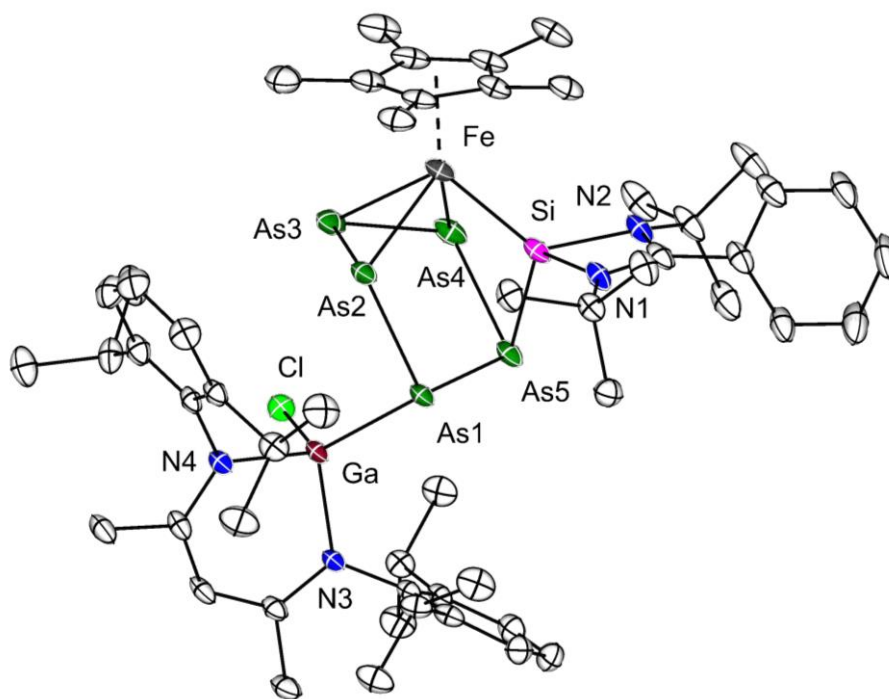

**Figure S34.** Molecular structure of the complex **5** in the solid state with thermal ellipsoids at 30% level. Selected bond distances [Å] and angles [°]: As1–As2 2.4467(4), As2–As3 2.3669(5), As3–As4 2.3222(5), As4–As5 2.5375(5), As1–As5 2.3986(4), Ga1–As1 2.4080(4), Si–As5 2.3711(8); As1–As2–As3 103.59(2), As2–As3–As4 97.33(2), As3–As4–As5 107.00(2), As1–As5–As4 103.31(2), As2–As1–As5 99.135(15).

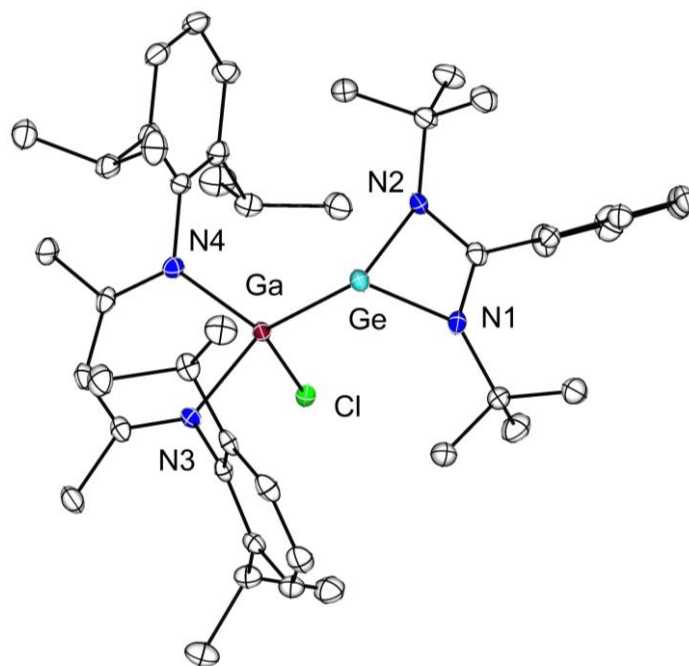

**Figure S35.** Molecular structure of the complex **6** in the solid state with thermal ellipsoids at 30% level. Selected bond distances [ $\text{\AA}$ ] and angles [ $^\circ$ ]: Ga–Ge 2.5512(10), Ga–Cl 2.3485(10); Ge–Ga–Cl 120.67(3), N1–Ge–N2 65.31(11), N3–Ga–N4 92.73(11).

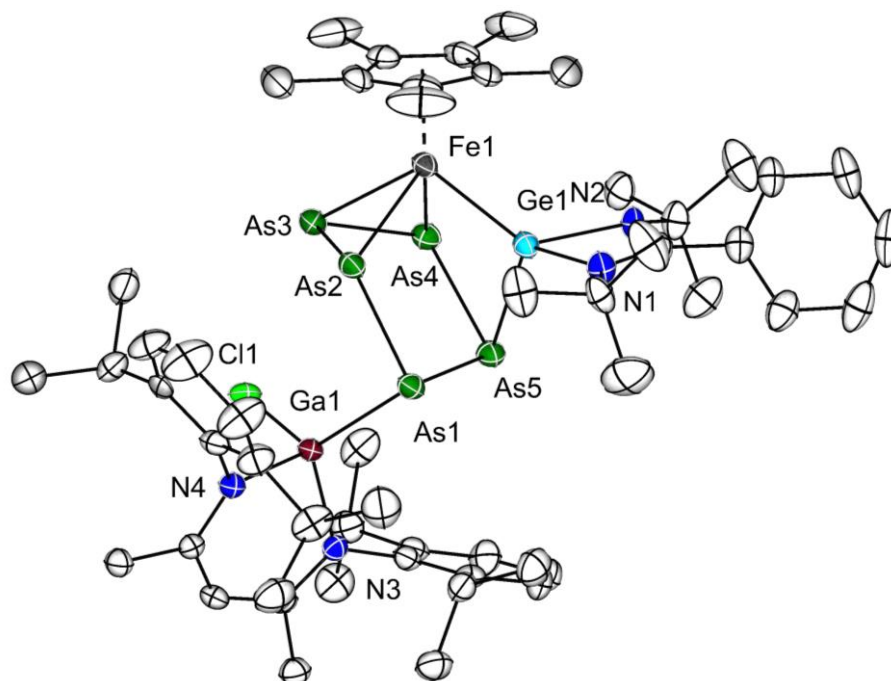

**Figure S36.** Molecular structure of the complex **7** in the solid state with thermal ellipsoids at 30% level. Two molecules are found in the asymmetric unit, only one of them is depicted here. Selected bond distances [Å] and angles [°]: As1–As2 2.4345(10), As2–As3 2.3638(12), As3–As4 2.3210(11), As4–As5 2.5510(10), As1–As5 2.4027(10), Ga1–As1 2.4014(9), Ge1–As5 2.4325(9); As1–As2–As3 103.04(4), As2–As3–As4 98.62(4), As3–As4–As5 107.50(4), As1–As5–As4 101.91(3), As2–As1–As5 101.23(3).

## VI. Quantum chemical calculations

All computations were performed using Gaussian16<sup>[S10]</sup> utilizing the PBE0 level of theory, Def2SVP basis sets and empirical dispersion correction (GD3). The temperature is the default temperature of 298.15 K. No solvent corrections were applied. All optimized molecular structures were checked to be minima on the energy hypersurface and possess no imaginary vibrational frequencies. Transition states were checked to possess exactly one imaginary vibrational frequency. Calculated NMR data were obtained on the aforementioned level of theory and are referenced to Me<sub>4</sub>Si at 0 ppm (data given are relative to 407 ppm absolute chemical shift) for <sup>29</sup>Si and to PH<sub>3</sub> at -248 ppm (data given are relative to 380 ppm absolute chemical shift) for <sup>31</sup>P.

### VI.1 Computed Energetics and NMR data

**Table S5.** Relative energies of the intermediates of the rearrangement, complete molecule.

| P <sub>5</sub> +GaSi | G [a.u.]     | ΔG [kJ/mol] |
|----------------------|--------------|-------------|
| 1 / Int1             | -7961.788048 | 0.0         |
| 4-P / Int4           | -7961.803983 | -41.8       |
| 2 / Int7             | -7961.811135 | -60.6       |
| 3 / Int9             | -7961.816024 | -73.5       |

**Table S6.** Relative energies of the intermediates of the rearrangement, complete molecule.

| As <sub>5</sub> +GaSi | G [a.u.]     | ΔG [kJ/mol] |
|-----------------------|--------------|-------------|
| 1-As / Int1           | -17432.91379 | 0.0         |
| 4 / Int4              | -17432.93855 | -65.0       |
| 2-As / Int7           | -17432.93857 | -65.1       |
| 5 / Int9              | -17432.94467 | -81.1       |

**Table S7.** Calculated <sup>29</sup>Si and <sup>31</sup>P NMR data for 1, 2, 3 and Int4 in (δ in ppm).

| P <sub>5</sub> +GaSi | <sup>29</sup> Si | <sup>31</sup> P |      |      |      |      |
|----------------------|------------------|-----------------|------|------|------|------|
| 1 / Int1             | 13               | 42              | -83  | -119 | 92   | 85   |
| 4-P / Int4           | 54               | 138             | 108  | -9   | -19  | -230 |
| 2 / Int7             | 104              | 209             | 77   | -16  | -48  | -77  |
| 3 / Int9             | 18               | -109            | -115 | -251 | -253 | -230 |

**Table S8.** Imaginary frequencies in calculated species.

| Compound                 | # of imaginary frequencies | Energy of imaginary frequency [cm <sup>-1</sup> ] |
|--------------------------|----------------------------|---------------------------------------------------|
| TS1 <sup>M</sup> – P/Si  | 1                          | -47.68                                            |
| TS2 <sup>M</sup> – P/Si  | 1                          | -75.98                                            |
| TS3 <sup>M</sup> – P/Si  | 1                          | -62.67                                            |
| TS4 <sup>M</sup> – P/Si  | 1                          | -173.51                                           |
| TS5 <sup>M</sup> – P/Si  | 1                          | -34.92                                            |
| TS6 <sup>M</sup> – P/Si  | 1                          | -47.10                                            |
| TS7 <sup>M</sup> – P/Si  | 1                          | -24.94                                            |
| TS8 <sup>M</sup> – P/Si  | 1                          | -253.28                                           |
| TS9 <sup>M</sup> – P/Si  | 1                          | -89.34                                            |
| TS10 <sup>M</sup> – P/Si | 1                          | -71.09                                            |

## VI.2 Reaction pathway with model compounds

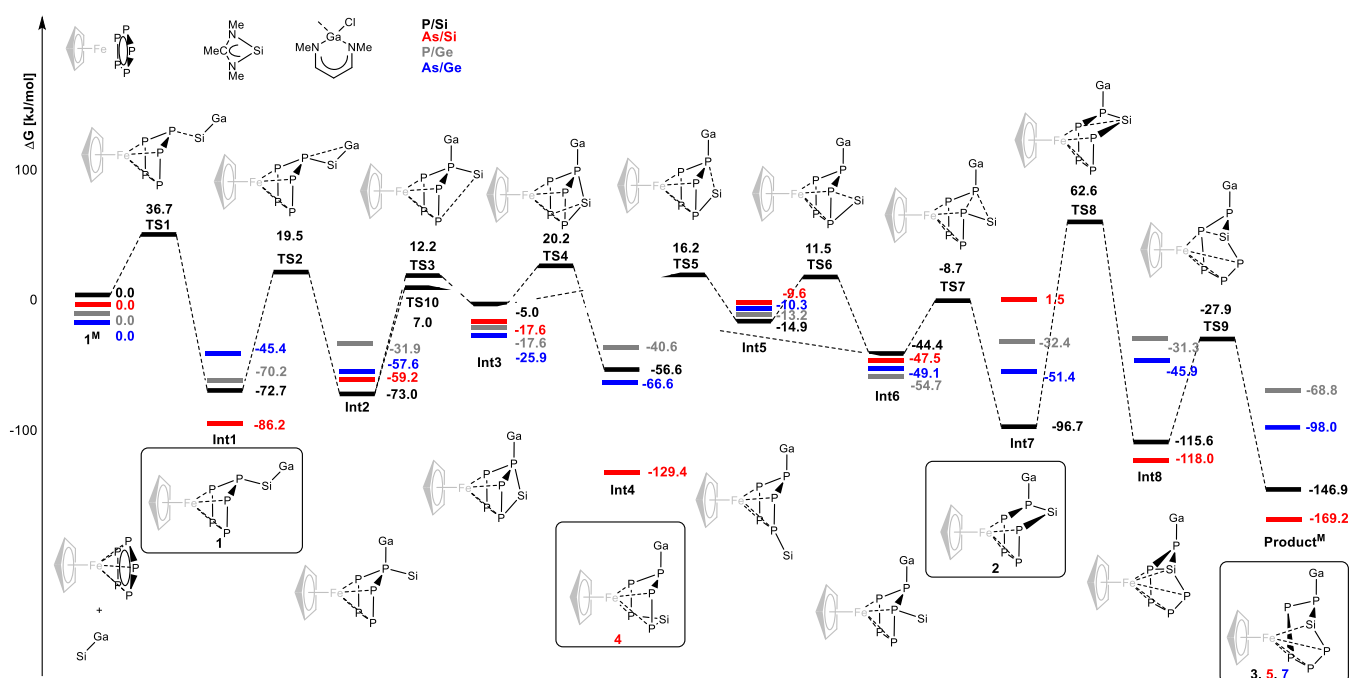

**Figure S37.** Computed reaction pathway for model compounds with methyl substituents on N (black: CpFeP<sub>5</sub>+gallasilylene, red: CpFeAs<sub>5</sub>+gallasilylene, grey: CpFeP<sub>5</sub>+gallagermylene, blue: CpFeAs<sub>5</sub>+gallagermylene). Transition states are given for P<sub>5</sub>/Si. The highlighted intermediates were isolated. **TS10<sup>M</sup>** connects **Int2** and **Int6**.

**Table S9.** Energies of the intermediates in the reaction relative to the respective starting materials in kJ/mol. Bold numbers are correlated with isolated compounds.

| Intermediate      | P <sub>5</sub> +Si | As <sub>5</sub> +Si | P <sub>5</sub> +Ge | As <sub>5</sub> +Ge |
|-------------------|--------------------|---------------------|--------------------|---------------------|
| start             | 0.0                | 0.0                 | <b>0.0</b>         | 0.0                 |
| Int1 <sup>M</sup> | <b>-72.7</b>       | -86.2               | 18.3               | -18.1               |
| Int2 <sup>M</sup> | -73.0              | -59.2               | -31.9              | <b>-57.6</b>        |
| Int3 <sup>M</sup> | -5.0               | -17.6               | -17.6              | -25.9               |
| Int4 <sup>M</sup> | -56.6              | <b>-129.4</b>       | -40.6              | -66.6               |
| Int5 <sup>M</sup> | -14.9              | -9.6                | -13.2              | -10.3               |
| Int6 <sup>M</sup> | -44.4              | -47.5               | -54.7              | -49.1               |
| Int7 <sup>M</sup> | <b>-96.7</b>       | 1.5                 | -32.4              | -51.4               |
| Int8 <sup>M</sup> | -115.6             | -118.0              | -31.3              | -45.9               |
| Int9 <sup>M</sup> | <b>-146.9</b>      | <b>-169.2</b>       | -68.8              | <b>-98.0</b>        |

## VI.3 Optimized structures Complete molecules

## VI.3.1 compound 1, P

|    |             |             |             |  |
|----|-------------|-------------|-------------|--|
| 0  | 1           |             |             |  |
| Ga | -2.25505300 | -0.70705100 | 0.81639700  |  |
| Fe | 4.46473400  | -0.12398900 | -0.55587800 |  |
| Cl | -2.99764400 | -0.24857900 | 2.89063300  |  |
| P  | 1.75563700  | -0.30690900 | 0.73340500  |  |
| Si | -0.27611700 | 0.64519600  | 0.46779400  |  |
| P  | 2.51150200  | -1.31474300 | -1.03466900 |  |
| P  | 3.20674700  | 1.30369300  | 0.80067400  |  |

|   |             |             |             |
|---|-------------|-------------|-------------|
| P | 3.61297600  | 1.92104200  | -1.23857100 |
| P | 3.14309300  | 0.21489600  | -2.44157000 |
| N | -0.39834200 | 2.07567500  | -0.67209600 |
| N | -1.94765100 | -2.64656300 | 0.90498600  |
| N | -3.94505000 | -0.81891700 | -0.17353700 |
| N | -0.25077800 | 2.19733300  | 1.47159700  |
| C | 6.36551700  | -0.09937200 | -1.29835000 |
| C | -0.67701400 | 2.28860600  | -2.10080800 |
| C | -5.08635500 | 1.31678800  | -0.63470900 |
| C | 5.54409400  | -1.76287800 | 0.09162600  |
| C | 6.35580300  | 0.40603900  | 0.04339500  |
| C | -4.35009700 | -0.12131200 | -2.48946000 |
| C | 5.86709700  | -1.44325900 | -1.26857100 |
| C | -3.02451500 | -3.40810100 | 1.07825700  |
| C | -4.77234200 | -1.78574600 | 0.25828600  |
| C | -0.63751000 | 0.89804500  | -2.72694100 |
| H | 0.34735700  | 0.42825900  | -2.57595200 |
| H | -0.82108800 | 0.96182000  | -3.80811700 |
| H | -1.41931300 | 0.25501400  | -2.29296300 |
| C | -0.66133700 | -3.27948900 | 0.84443300  |
| C | -4.34501000 | -2.93265400 | 0.93529800  |
| H | -5.13026000 | -3.62248700 | 1.24006500  |
| C | 0.35719500  | 1.31979000  | 3.63125700  |
| H | 0.47571600  | 1.54447200  | 4.70117100  |
| H | 1.30792200  | 0.91238600  | 3.25806400  |
| H | -0.42919000 | 0.55661300  | 3.53674100  |
| C | -0.27215400 | 2.92676000  | 0.35105000  |
| C | 5.84302200  | -0.62449000 | 0.89923700  |
| C | -5.16799800 | 1.65949300  | 0.83888700  |
| H | -4.90512100 | 0.76353700  | 1.41841500  |
| C | -1.20503500 | 5.24806800  | 0.46449400  |
| H | -2.18595000 | 4.83128600  | 0.70124100  |
| C | -0.28761300 | -3.95474800 | -0.33600900 |
| C | -4.45488600 | 0.14482700  | -1.10164000 |
| C | -0.03033200 | 2.59024200  | 2.87899500  |
| C | -0.12037800 | 4.39490300  | 0.24491100  |
| C | 0.19137200  | -3.24744300 | 1.97196500  |
| C | -4.90837000 | 0.79980900  | -3.38105000 |
| H | -4.84210300 | 0.61734100  | -4.45404900 |
| C | -5.54362000 | 1.95273800  | -2.93247200 |
| H | -5.97001500 | 2.65729700  | -3.65051400 |
| C | -1.33572100 | 3.14131600  | 3.45700200  |
| H | -1.18729500 | 3.41225100  | 4.51328000  |
| H | -2.13058700 | 2.38471100  | 3.39970100  |
| H | -1.65704400 | 4.04540900  | 2.91978900  |
| C | -6.24556200 | -1.64902800 | -0.00578700 |
| H | -6.63694600 | -0.77933200 | 0.54380700  |
| H | -6.78973900 | -2.54478900 | 0.31506900  |
| H | -6.45085100 | -1.46477600 | -1.06939100 |
| C | 0.36889500  | 3.17771400  | -2.77369100 |
| H | 0.30119000  | 4.21871200  | -2.43163400 |
| H | 0.19666400  | 3.17174100  | -3.86032600 |
| H | 1.38363900  | 2.80240500  | -2.58265100 |
| C | -5.62053000 | 2.20858800  | -1.57143800 |
| H | -6.10685800 | 3.12200600  | -1.22142200 |
| C | -2.07035100 | 2.89908700  | -2.25757200 |
| H | -2.83487200 | 2.26840400  | -1.78379500 |
| H | -2.32397100 | 2.99367800  | -3.32371200 |
| H | -2.11386900 | 3.90305000  | -1.80989000 |
| C | -4.13079200 | 2.72822600  | 1.18273500  |
| H | -3.11075500 | 2.38798300  | 0.94819600  |
| H | -4.15811100 | 2.96835800  | 2.25560900  |
| H | -4.32089900 | 3.65317600  | 0.61319400  |
| C | 5.72493000  | -2.36671800 | -2.43181000 |
| H | 4.81325800  | -2.97674700 | -2.34217100 |
| H | 6.58595300  | -3.05262600 | -2.50594900 |
| H | 5.65050500  | -1.80953800 | -3.37590400 |
| C | 1.39074500  | -3.96055500 | 1.90462800  |
| H | 2.06564900  | -3.95482600 | 2.76099500  |
| C | -3.65724600 | -1.36885800 | -3.01827600 |
| H | -2.78760000 | -1.54774500 | -2.36428100 |
| C | 1.13970000  | 4.91810700  | -0.06961400 |
| H | 1.97937900  | 4.23778500  | -0.23697400 |
| C | -6.56535400 | 2.09560400  | 1.27736400  |
| H | -6.85784200 | 3.06155900  | 0.83612900  |
| H | -6.59682500 | 2.21381900  | 2.37126900  |
| H | -7.33176300 | 1.35757900  | 0.99433000  |
| C | 0.92816100  | -4.64383600 | -0.35102700 |



|   |             |             |             |
|---|-------------|-------------|-------------|
| H | 1.23980600  | -5.15982700 | -1.26187600 |
| C | 1.09551800  | 3.61702400  | 3.02167400  |
| H | 0.81124000  | 4.60467800  | 2.63563000  |
| H | 2.00307700  | 3.27333800  | 2.50219300  |
| H | 1.33166700  | 3.73393000  | 4.08983100  |
| C | -3.14425000 | -1.20279300 | -4.44665000 |
| H | -3.97164900 | -1.16696900 | -5.17263400 |
| H | -2.51587700 | -2.06079100 | -4.72451000 |
| H | -2.54321000 | -0.29137500 | -4.56834300 |
| C | 1.75301300  | -4.66619000 | 0.76327300  |
| H | 2.69834000  | -5.21222600 | 0.73611500  |
| C | -0.17266200 | -2.46852300 | 3.22357400  |
| H | -0.62523700 | -1.52277700 | 2.88409500  |
| C | -1.11968500 | -3.91001600 | -1.60449100 |
| H | -2.08971900 | -3.44942300 | -1.36241900 |
| C | 6.81514500  | 1.75343900  | 0.48976000  |
| H | 6.78678400  | 2.47735000  | -0.33643400 |
| H | 7.84771000  | 1.71598300  | 0.87658000  |
| H | 6.16909300  | 2.14617300  | 1.28946000  |
| C | -2.86436200 | -4.87005900 | 1.38341800  |
| H | -2.71827300 | -5.42730200 | 0.44542800  |
| H | -3.76669700 | -5.26080500 | 1.87066300  |
| H | -1.98647100 | -5.06543900 | 2.01215300  |
| C | 0.22667800  | 7.15194200  | 0.06559400  |
| H | 0.36369400  | 8.23385500  | -0.00295600 |
| C | -0.43014000 | -3.02452900 | -2.64341700 |
| H | -0.28581300 | -2.00039700 | -2.27145700 |
| H | -1.01623100 | -2.98100500 | -3.57323400 |
| H | 0.57227500  | -3.40683300 | -2.88830700 |
| C | -1.02848900 | 6.62766700  | 0.37116500  |
| H | -1.87687600 | 7.29487700  | 0.53961600  |
| C | 1.03650800  | -2.09640700 | 4.07481200  |
| H | 1.47440300  | -2.97687700 | 4.57201900  |
| H | 0.73121700  | -1.39784800 | 4.86801900  |
| H | 1.81534800  | -1.60989800 | 3.46857400  |
| C | 1.30772900  | 6.29680100  | -0.15423400 |
| H | 2.29224700  | 6.70451400  | -0.39423700 |
| C | 5.04493000  | -3.07514600 | 0.59584600  |
| H | 4.33066700  | -2.93964400 | 1.42027200  |
| H | 5.87972000  | -3.69686900 | 0.96379300  |
| H | 4.52390900  | -3.63199800 | -0.19409700 |
| C | 6.84290700  | 0.63189600  | -2.50762800 |
| H | 6.30267900  | 0.30426300  | -3.40706600 |
| H | 7.92054900  | 0.46554800  | -2.67483600 |
| H | 6.67515700  | 1.71360700  | -2.40764800 |
| C | 5.70288000  | -0.55570900 | 2.38361500  |
| H | 5.57682100  | 0.48003000  | 2.72676200  |
| H | 6.59429000  | -0.97574200 | 2.88114900  |
| H | 4.82581700  | -1.12295300 | 2.72764100  |
| C | -4.53862200 | -2.62036400 | -2.94564400 |
| H | -4.77754800 | -2.91218300 | -1.91540900 |
| H | -4.01812600 | -3.47321900 | -3.40893200 |
| H | -5.48253600 | -2.46617700 | -3.49280700 |
| C | -1.22610500 | -3.17363300 | 4.08030600  |
| H | -2.18517400 | -3.27994200 | 3.55759400  |
| H | -1.42579300 | -2.58621000 | 4.98930800  |
| H | -0.87606900 | -4.17268300 | 4.38724200  |
| C | -1.40438300 | -5.29706600 | -2.18127000 |
| H | -0.48415000 | -5.78539100 | -2.53751000 |
| H | -2.08694800 | -5.22060900 | -3.04221700 |
| H | -1.86802600 | -5.96709600 | -1.44138700 |

### VI.3.2 compound 1, As analogue

|     |             |             |             |
|-----|-------------|-------------|-------------|
| 0 1 |             |             |             |
| Ga  | -2.82335600 | -0.65302700 | 0.77103200  |
| Fe  | 4.30207700  | -0.32049700 | -0.32777800 |
| Cl  | -3.69572000 | -0.17950400 | 2.79247700  |
| As  | 1.28584800  | -0.54374900 | 0.92878800  |
| Si  | -0.75330800 | 0.59542800  | 0.55784300  |
| As  | 2.26541700  | -1.50899300 | -1.03180800 |
| As  | 2.97225100  | 1.13089400  | 1.16985800  |
| As  | 3.62798800  | 1.95168100  | -0.95575400 |
| As  | 3.12574400  | 0.20046600  | -2.43062500 |
| N   | -0.75038400 | 2.05044300  | -0.55878500 |
| N   | -2.61006600 | -2.60908700 | 0.87658100  |
| N   | -4.44308400 | -0.69309900 | -0.33657300 |
| N   | -0.72859200 | 2.13233100  | 1.59047400  |
| C   | 6.25970400  | -0.36337300 | -0.92611300 |

|   |             |             |             |
|---|-------------|-------------|-------------|
| C | -0.90836300 | 2.29626800  | -2.00033200 |
| C | -5.45997400 | 1.49148000  | -0.85629600 |
| C | 5.25217500  | -2.05292800 | 0.30006900  |
| C | 6.17602200  | 0.06681400  | 0.43855500  |
| C | -4.64799500 | 0.03936300  | -2.66792800 |
| C | 5.69208700  | -1.67668200 | -1.01182600 |
| C | -3.72615600 | -3.32768700 | 0.95393500  |
| C | -5.33916400 | -1.62744100 | 0.02310900  |
| C | -0.85214400 | 0.91735100  | -2.65044900 |
| H | 0.10890200  | 0.42204200  | -2.43879500 |
| H | -0.95543900 | 1.00591700  | -3.74060000 |
| H | -1.67712400 | 0.28361100  | -2.28819700 |
| C | -1.34647900 | -3.28770300 | 0.91434700  |
| C | -5.01151500 | -2.79710100 | 0.71640700  |
| H | -5.84484800 | -3.45748100 | 0.95072700  |
| C | -0.32273100 | 1.20314500  | 3.77447700  |
| H | -0.27884000 | 1.40778000  | 4.85399100  |
| H | 0.63760200  | 0.76099500  | 3.47160700  |
| H | -1.13010300 | 0.47551000  | 3.60700400  |
| C | -0.65729400 | 2.88037500  | 0.48463900  |
| C | 5.54991200  | -0.97930400 | 1.19271900  |
| C | -5.63304600 | 1.82587900  | 0.61126800  |
| H | -5.45105800 | 0.91481000  | 1.19819100  |
| C | -1.52571200 | 5.22828800  | 0.55261700  |
| H | -2.53477600 | 4.83928200  | 0.70145900  |
| C | -0.88500700 | -3.93843100 | -0.24867500 |
| C | -4.84404700 | 0.29827600  | -1.28878700 |
| C | -0.59723300 | 2.49830100  | 3.01508600  |
| C | -0.45194700 | 4.34473100  | 0.41471400  |
| C | -0.59713500 | -3.31053900 | 2.11394000  |
| C | -5.10405500 | 0.98844600  | -3.58791100 |
| H | -4.96681300 | 0.81200000  | -4.65516700 |
| C | -5.72440600 | 2.16236600  | -3.17426700 |
| H | -6.06961700 | 2.88879800  | -3.91380100 |
| C | -1.91592600 | 3.10139200  | 3.50466900  |
| H | -1.83400800 | 3.35323700  | 4.57286600  |
| H | -2.73757500 | 2.38289900  | 3.37784700  |
| H | -2.15540700 | 4.02540000  | 2.95870500  |
| C | -6.78178700 | -1.42751100 | -0.34841900 |
| H | -7.17669000 | -0.54444600 | 0.17675600  |
| H | -7.38519800 | -2.30094300 | -0.07553000 |
| H | -6.89927700 | -1.23027400 | -1.42300400 |
| C | 0.21082200  | 3.16890600  | -2.56789500 |
| H | 0.13938000  | 4.20645100  | -2.21642300 |
| H | 0.13208600  | 3.18226000  | -3.66520100 |
| H | 1.19680000  | 2.76457800  | -2.29935000 |
| C | -5.88885600 | 2.41123300  | -1.81967800 |
| H | -6.36226300 | 3.34105700  | -1.49616000 |
| C | -2.26891000 | 2.94648600  | -2.25436400 |
| H | -3.08404100 | 2.32815000  | -1.85457400 |
| H | -2.43463700 | 3.06728300  | -3.33506100 |
| H | -2.32225300 | 3.94290200  | -1.79122900 |
| C | -4.57806300 | 2.84547100  | 1.03979600  |
| H | -3.55956300 | 2.46436300  | 0.87003100  |
| H | -4.66853800 | 3.07501200  | 2.11157300  |
| H | -4.69017100 | 3.78362500  | 0.47118200  |
| C | 5.62299600  | -2.53512800 | -2.23056600 |
| H | 4.70840700  | -3.14699100 | -2.23660400 |
| H | 6.48640500  | -3.22043600 | -2.28240200 |
| H | 5.61446000  | -1.92869500 | -3.14704100 |
| C | 0.59323300  | -4.04189400 | 2.12779500  |
| H | 1.19004600  | -4.07628400 | 3.03964200  |
| C | -3.96346200 | -1.22855200 | -3.15734600 |
| H | -3.15196500 | -1.44381600 | -2.44234700 |
| C | 0.84452800  | 4.83393300  | 0.21426400  |
| H | 1.67562100  | 4.13092600  | 0.10954800  |
| C | -7.03815500 | 2.31901900  | 0.95384900  |
| H | -7.25694400 | 3.29986000  | 0.50283900  |
| H | -7.14253500 | 2.43073100  | 2.04390700  |
| H | -7.81326500 | 1.61689700  | 0.60972500  |
| C | 0.32532100  | -4.63562200 | -0.18449700 |
| H | 0.70873000  | -5.12573200 | -1.08214000 |
| C | 0.55803800  | 3.47269400  | 3.25623100  |
| H | 0.34373300  | 4.47711400  | 2.86849100  |
| H | 1.48671600  | 3.10129500  | 2.79648400  |
| H | 0.72256100  | 3.56370900  | 4.34021900  |
| C | -3.33987100 | -1.06905700 | -4.54178400 |
| H | -4.10918700 | -0.99639900 | -5.32649100 |

|   |             |             |             |
|---|-------------|-------------|-------------|
| H | -2.72382500 | -1.94694900 | -4.78261200 |
| H | -2.69897300 | -0.17929500 | -4.60795500 |
| C | 1.05191700  | -4.70424300 | 0.99500800  |
| H | 1.99471900  | -5.25472300 | 1.02747100  |
| C | -1.05196500 | -2.55248500 | 3.34890700  |
| H | -1.44120200 | -1.58463800 | 2.99423800  |
| C | -1.62421600 | -3.87417300 | -1.57287800 |
| H | -2.59723400 | -3.39006600 | -1.39810200 |
| C | 6.69747800  | 1.34726500  | 1.00003500  |
| H | 6.75740600  | 2.12747100  | 0.22839100  |
| H | 7.70583000  | 1.21148700  | 1.42719100  |
| H | 6.04345700  | 1.72794100  | 1.79892000  |
| C | -3.64985500 | -4.79941000 | 1.24470600  |
| H | -3.48042700 | -5.34880900 | 0.30587800  |
| H | -4.59504500 | -5.15411200 | 1.67514400  |
| H | -2.81872700 | -5.04591000 | 1.91711200  |
| C | -0.01115700 | 7.09261700  | 0.29802000  |
| H | 0.16229300  | 8.17055200  | 0.25353500  |
| C | -0.84848100 | -3.01251400 | -2.56866700 |
| H | -0.69782300 | -1.99127900 | -2.19104000 |
| H | -1.37734400 | -2.95427200 | -3.53126700 |
| H | 0.15450000  | -3.42446100 | -2.75599400 |
| C | -1.30199000 | 6.60293800  | 0.49149500  |
| H | -2.14199600 | 7.29333300  | 0.59662300  |
| C | 0.08274600  | -2.24292300 | 4.31953300  |
| H | 0.43953000  | -3.14904500 | 4.83522200  |
| H | -0.27220700 | -1.54885500 | 5.09589900  |
| H | 0.93606100  | -1.77567600 | 3.80564400  |
| C | 1.05927700  | 6.20757300  | 0.15980900  |
| H | 2.07199900  | 6.58742600  | 0.00738300  |
| C | 4.68058100  | -3.37299000 | 0.70003400  |
| H | 3.92472700  | -3.25896600 | 1.49022200  |
| H | 5.47373800  | -4.04000400 | 1.08115900  |
| H | 4.19242500  | -3.87415100 | -0.14692600 |
| C | 6.88721600  | 0.39391900  | -2.04796700 |
| H | 6.40679700  | 0.15455000  | -3.00724000 |
| H | 7.96107300  | 0.15553300  | -2.13426800 |
| H | 6.79012400  | 1.47867600  | -1.89935600 |
| C | 5.33662600  | -1.00218400 | 2.67016800  |
| H | 5.26368100  | 0.01273700  | 3.08364600  |
| H | 6.17332100  | -1.51659900 | 3.17461600  |
| H | 4.40883000  | -1.53037100 | 2.93341500  |
| C | -4.89148500 | -2.44796600 | -3.16336300 |
| H | -5.21941300 | -2.73714400 | -2.15710200 |
| H | -4.36747500 | -3.31624100 | -3.59300300 |
| H | -5.78447100 | -2.25654600 | -3.77986500 |
| C | -2.20321900 | -3.23817800 | 4.08741300  |
| H | -3.11553400 | -3.29038300 | 3.48004800  |
| H | -2.45996100 | -2.66795200 | 4.99303000  |
| H | -1.92074500 | -4.25867800 | 4.39331600  |
| C | -1.90067400 | -5.25832800 | -2.16163000 |
| H | -0.96887800 | -5.76743400 | -2.45295600 |
| H | -2.52275300 | -5.17225600 | -3.06644200 |
| H | -2.42572200 | -5.91457700 | -1.45119800 |

## VI.3.3 compound 2, P

|    |             |             |             |
|----|-------------|-------------|-------------|
| O  | 1           |             |             |
| Ga | -0.09266300 | -2.05613900 | 0.64454900  |
| Fe | -2.04969800 | 3.04536900  | -0.70467200 |
| Cl | 0.78665300  | -1.93575400 | 2.69494100  |
| P  | -0.09919200 | -0.30480400 | -0.85488600 |
| P  | 0.21282500  | 3.35381800  | -0.70815400 |
| P  | -2.05883500 | 0.75422300  | -0.55971800 |
| Si | 1.12216000  | 1.39880200  | -0.27175100 |
| P  | -2.27322300 | 1.62257200  | -2.52358000 |
| P  | -0.75137000 | 3.16079800  | -2.64531900 |
| N  | -1.77295000 | -3.02788800 | 0.92486000  |
| N  | 2.16146900  | 1.62684900  | 1.24174300  |
| N  | 0.89107400  | -3.56019800 | -0.15027000 |
| N  | 2.90441600  | 1.43834600  | -0.76481200 |
| C  | -2.58394800 | 5.03809500  | -0.47236800 |
| C  | -1.69799500 | -4.33353900 | 1.19351200  |
| C  | 0.59713900  | -4.79867300 | 0.24300600  |
| C  | -3.61162700 | 4.31392300  | -1.15087000 |
| C  | -4.06014000 | 3.26285200  | -0.28432700 |
| C  | -0.55578200 | -5.12431400 | 0.97504900  |
| C  | -0.64184300 | -6.16582800 | 1.27976000  |
| H  | 3.25043400  | 1.77543200  | 0.47696000  |

|   |             |             |             |
|---|-------------|-------------|-------------|
| C | -3.30588100 | 3.34027200  | 0.93219100  |
| C | -3.05333200 | -2.38164700 | 0.99384800  |
| C | -3.24302400 | -2.66814300 | -1.54201800 |
| H | -2.17622000 | -2.38509500 | -1.53619500 |
| C | 1.67444300  | -3.28549900 | -2.45162900 |
| C | -3.80241400 | -2.23694000 | -0.19629400 |
| C | -3.54034700 | -1.90506400 | 2.22651100  |
| C | 0.26435100  | -3.44959400 | -2.98670700 |
| H | -0.42163700 | -3.34689600 | -2.13313500 |
| C | -4.80805200 | -1.31295500 | 2.25523000  |
| H | -5.19699200 | -0.93059600 | 3.20220100  |
| C | -2.39780700 | 4.43572900  | 0.81589000  |
| C | 1.96327400  | -3.34013200 | -1.06958800 |
| C | 1.84857100  | 2.07901300  | 2.60579500  |
| C | 4.55631600  | 2.32975300  | 0.91001500  |
| C | 3.28410900  | -3.18830100 | -0.59703900 |
| C | 3.63317000  | 1.41201100  | -2.04005100 |
| C | -1.50667500 | 4.96473700  | 1.88907700  |
| H | -1.22832900 | 4.18634400  | 2.61133800  |
| H | -2.01750000 | 5.76872600  | 2.44633700  |
| H | -0.57990800 | 5.38361700  | 1.47218300  |
| C | 1.52760300  | -5.92044500 | -0.12137500 |
| H | 1.74281800  | -5.92133100 | -1.19921500 |
| H | 1.11005800  | -6.89297300 | 0.16373900  |
| H | 2.49385700  | -5.78507700 | 0.38705900  |
| C | -5.57544100 | -1.20275900 | 1.10454800  |
| H | -6.56562900 | -0.74237000 | 1.14615300  |
| C | 3.61780900  | -3.17906400 | 0.88254100  |
| H | 2.71288400  | -3.46064200 | 1.43999900  |
| C | 2.77438800  | 0.58731500  | -2.99971500 |
| H | 1.79062200  | 1.05857800  | -3.15543500 |
| H | 2.61242700  | -0.42913100 | -2.61370100 |
| H | 3.27339200  | 0.51225400  | -3.97691100 |
| C | 6.05482100  | 4.22302000  | 1.03325500  |
| H | 6.26758500  | 5.27360900  | 0.82277900  |
| C | -3.88366500 | -1.93988900 | -2.71905300 |
| H | -4.92699500 | -2.25658700 | -2.87891500 |
| H | -3.33359200 | -2.16879400 | -3.64391500 |
| H | -3.86045700 | -0.84975700 | -2.57874700 |
| C | -4.15394000 | 4.62296600  | -2.50482100 |
| H | -3.38417500 | 5.07338800  | -3.14744900 |
| H | -5.00111200 | 5.32607500  | -2.43779700 |
| H | -4.50181700 | 3.71084700  | -3.00992900 |
| C | 4.83797600  | 3.67372400  | 0.63716500  |
| H | 4.09108500  | 4.28851900  | 0.12986600  |
| C | -2.91405600 | -5.03423300 | 1.73110500  |
| H | -3.16854800 | -4.63850700 | 2.72472900  |
| H | -2.74571200 | -6.11444700 | 1.81006200  |
| H | -3.78838500 | -4.84941300 | 1.09095300  |
| C | 0.37227700  | 1.74061600  | 2.80702000  |
| H | 0.02936500  | 2.09294400  | 3.79088800  |
| H | 0.22913300  | 0.65326400  | 2.76450300  |
| H | -0.25623200 | 2.21179500  | 2.03226500  |
| C | -2.72111200 | -1.95527500 | 3.50177200  |
| H | -1.81869200 | -2.55263100 | 3.30699200  |
| C | -3.51266700 | 2.47778600  | 2.13181800  |
| H | -3.76743100 | 1.44719500  | 1.84546900  |
| H | -4.33361600 | 2.87010500  | 2.75671500  |
| H | -2.61041400 | 2.43011100  | 2.75628700  |
| C | -1.85463600 | 6.23661100  | -0.98021100 |
| H | -0.79822900 | 6.21859700  | -0.67227200 |
| H | -2.30396300 | 7.16807700  | -0.59598000 |
| H | -1.87222400 | 6.27753700  | -2.07806600 |
| C | 2.06138000  | 3.58892800  | 2.74287500  |
| H | 1.51235800  | 4.12543800  | 1.95418000  |
| H | 3.12517300  | 3.85743000  | 2.67823500  |
| H | 1.68792900  | 3.93051000  | 3.72004500  |
| C | -5.06943600 | -1.65675700 | -0.10893700 |
| H | -5.66613100 | -1.53125700 | -1.01285800 |
| C | -5.16046800 | 2.29273900  | -0.55802200 |
| H | -5.30872500 | 2.15189400  | -1.63799200 |
| H | -6.11215400 | 2.64586500  | -0.12531800 |
| H | -4.93796400 | 1.30568600  | -0.12597700 |
| C | 2.68585400  | 1.31084100  | 3.62926000  |
| H | 2.36031000  | 1.57852300  | 4.64585600  |
| H | 3.75374600  | 1.55648900  | 3.54460700  |
| H | 2.54846400  | 0.22784900  | 3.49624600  |
| C | -3.32496500 | -4.18172700 | -1.75894900 |

|   |             |             |             |
|---|-------------|-------------|-------------|
| H | -2.70602500 | -4.74805100 | -1.05018900 |
| H | -2.97559500 | -4.43935100 | -2.77077800 |
| H | -4.36580900 | -4.53189800 | -1.66665200 |
| C | 5.49391700  | 1.54492500  | 1.58716900  |
| H | 5.27002900  | 0.50008300  | 1.80324700  |
| C | -2.25236400 | -0.54685600 | 3.86663900  |
| H | -1.76988500 | -0.06172400 | 3.00810700  |
| H | -1.52664500 | -0.57599300 | 4.69386100  |
| H | -3.10172800 | 0.08641100  | 4.17012500  |
| C | 6.71253100  | 2.09853800  | 1.97386500  |
| H | 7.44479300  | 1.47932300  | 2.49699000  |
| C | 4.30912000  | -3.01455000 | -1.53294200 |
| H | 5.33823600  | -2.90145000 | -1.18239600 |
| C | 2.73610200  | -3.11696400 | -3.34578400 |
| H | 2.52909700  | -3.08323800 | -4.41784600 |
| C | 6.99532700  | 3.43558200  | 1.69717700  |
| H | 7.95106000  | 3.86729200  | 2.00367800  |
| C | 3.98677200  | -1.76395900 | 1.32408600  |
| H | 4.89772200  | -1.42465200 | 0.80431000  |
| H | 4.17049200  | -1.72816900 | 2.40940400  |
| H | 3.17712000  | -1.05379900 | 1.10352400  |
| C | -0.10264800 | -2.36937300 | -4.00235200 |
| H | 0.50257000  | -2.44294200 | -4.91982200 |
| H | 0.02844900  | -1.36471600 | -3.57379600 |
| H | -1.15699900 | -2.47214600 | -4.30047400 |
| C | 0.06217800  | -4.84978600 | -3.57092100 |
| H | -0.96123500 | -4.96354600 | -3.96075300 |
| H | 0.21983300  | -5.63525800 | -2.81675300 |
| H | 0.76107000  | -5.03532500 | -4.40254200 |
| C | 4.04505400  | -2.98795300 | -2.89693800 |
| H | 4.86061700  | -2.85552200 | -3.61201700 |
| C | 3.78445400  | 2.83356300  | -2.59069400 |
| H | 4.19266600  | 2.79770200  | -3.61204400 |
| H | 4.47196000  | 3.43073200  | -1.97553700 |
| H | 2.80667100  | 3.33804500  | -2.62191400 |
| C | 4.99640400  | 0.74181200  | -1.87091700 |
| H | 4.87783000  | -0.26563000 | -1.44592500 |
| H | 5.66776600  | 1.32632000  | -1.22679300 |
| H | 5.47744600  | 0.64199300  | -2.85531900 |
| C | -3.46659400 | -2.59847400 | 4.67117700  |
| H | -4.34270600 | -2.00358200 | 4.97414900  |
| H | -2.80456700 | -2.67617400 | 5.54765800  |
| H | -3.82587900 | -3.61083500 | 4.42988500  |
| C | 4.72645600  | -4.16642100 | 1.24780000  |
| H | 4.49562500  | -5.18898500 | 0.91206000  |
| H | 4.86872900  | -4.19323800 | 2.33929100  |
| H | 5.69162200  | -3.88415100 | 0.79780700  |

### VI.3.4 compound 2, As analogue

|     |             |             |             |
|-----|-------------|-------------|-------------|
| 0 1 |             |             |             |
| Ga  | 2.13330700  | -1.12598400 | 0.66273700  |
| Fe  | -3.64857200 | -0.16696700 | -0.18456700 |
| Cl  | 2.54486300  | -0.31443900 | 2.70566000  |
| As  | 0.41650200  | -0.36182400 | -0.83797500 |
| As  | -2.63294700 | 2.00184600  | -0.44759300 |
| As  | -1.61282300 | -1.47726100 | 0.04203800  |
| Si  | -0.36517000 | 1.67810500  | -0.15352500 |
| As  | -2.74927800 | -1.48795500 | -2.03732900 |
| As  | -3.21338400 | 0.80692800  | -2.42445700 |
| N   | 2.18171900  | -3.06866000 | 0.97318900  |
| N   | 0.09717600  | 2.67688800  | 1.34354900  |
| N   | 3.89656200  | -1.02806100 | -0.21612000 |
| N   | 0.52458600  | 3.21628100  | -0.69141800 |
| C   | -5.57014900 | 0.53359700  | 0.17800200  |
| C   | 3.35874700  | -3.65073500 | 1.19619800  |
| C   | 4.84308500  | -1.89860900 | 0.13915600  |
| C   | -5.60942900 | -0.78090100 | -0.38014800 |
| C   | -4.90702500 | -1.66224400 | 0.50715400  |
| C   | 4.59647300  | -3.05502600 | 0.89639300  |
| H   | 5.47584900  | -3.63916400 | 1.16302400  |
| C   | 0.50573300  | 3.68037500  | 0.55743600  |
| C   | -4.43168400 | -0.88625000 | 1.61348900  |
| C   | 0.97573200  | -3.84065000 | 1.03096400  |
| C   | 1.28113800  | -4.30393400 | -1.46423100 |
| H   | 1.94218400  | -3.43016900 | -1.36151800 |
| C   | 3.93157600  | -0.11928100 | -2.49076300 |
| C   | 0.50757100  | -4.42973900 | -0.16453800 |
| C   | 0.26796000  | -3.98247800 | 2.24029100  |

|   |             |             |             |
|---|-------------|-------------|-------------|
| C | 3.25134700  | -1.36672200 | -3.02354700 |
| H | 2.62501200  | -1.75662100 | -2.20762800 |
| C | -0.91846100 | -4.72316000 | 2.22905900  |
| H | -1.48466000 | -4.83552800 | 3.15734400  |
| C | -4.84153100 | 0.46616500  | 1.41152400  |
| C | 4.21858100  | 0.03648400  | -1.11472700 |
| C | -0.34322100 | 2.65209600  | 2.74704400  |
| C | 0.74713000  | 5.08292000  | 0.97884400  |
| C | 4.81907200  | 1.21748700  | -0.62896600 |
| C | 0.87417900  | 3.82872200  | -1.97948500 |
| C | -4.68616300 | 1.58102600  | 2.39095700  |
| H | -3.77874300 | 1.46690400  | 2.99832500  |
| H | -5.54779700 | 1.60502300  | 3.08041000  |
| H | -4.63286400 | 2.55766700  | 1.88983500  |
| C | 6.26182500  | -1.65291800 | -0.29358600 |
| H | 6.31551000  | -1.41615900 | -1.36553200 |
| H | 6.89628300  | -2.52176300 | -0.08332500 |
| H | 6.67062800  | -0.78115600 | 0.23834200  |
| C | -1.39037300 | -5.31300000 | 1.06353500  |
| H | -2.32117100 | -5.88538100 | 1.07541700  |
| C | 5.03949700  | 1.46686500  | 0.85080500  |
| H | 4.82573400  | 0.53561600  | 1.39477700  |
| C | 1.04439500  | 2.67282100  | -2.96608100 |
| H | 0.10976400  | 2.09765100  | -3.06660600 |
| H | 1.84177400  | 1.98962100  | -2.63983500 |
| H | 1.31027800  | 3.06433900  | -3.95884200 |
| C | -0.07946100 | 7.34889700  | 1.15649200  |
| H | -0.87777000 | 8.07732900  | 0.99702300  |
| C | 0.38333500  | -4.05845200 | -2.67277000 |
| H | -0.26175200 | -4.92386300 | -2.89084700 |
| H | 0.99732200  | -3.88452400 | -3.56937900 |
| H | -0.26508500 | -3.18312600 | -2.52041400 |
| C | -6.32278700 | -1.17848400 | -1.62789800 |
| H | -6.32542000 | -0.36072600 | -2.36258200 |
| H | -7.37017200 | -1.44803400 | -1.41021400 |
| H | -5.83891900 | -2.04129800 | -2.10719400 |
| C | -0.26875200 | 6.02402200  | 0.77146700  |
| H | -1.21344100 | 5.70709600  | 0.32368500  |
| C | 3.39099600  | -5.02396300 | 1.80601000  |
| H | 3.17765000  | -4.93790600 | 2.88322300  |
| H | 4.37389900  | -5.49387600 | 1.68296600  |
| H | 2.61579000  | -5.67654900 | 1.38347800  |
| C | -0.82773900 | 1.22392400  | 2.98994100  |
| H | -1.21846900 | 1.12183600  | 4.01305700  |
| H | 0.00722300  | 0.52084200  | 2.87322800  |
| H | -1.62772200 | 0.94522500  | 2.28303500  |
| C | 0.73032200  | -3.33919300 | 3.53260000  |
| H | 1.69915100  | -2.85483500 | 3.34186200  |
| C | -3.74663600 | -1.43176100 | 2.82184500  |
| H | -3.11600000 | -2.29645700 | 2.57113800  |
| H | -4.48767900 | -1.75905000 | 3.57169500  |
| H | -3.09851500 | -0.68246800 | 3.29564200  |
| C | -6.23014400 | 1.75113700  | -0.37800200 |
| H | -5.64455200 | 2.65784200  | -0.16517300 |
| H | -7.23496000 | 1.88982200  | 0.05624600  |
| H | -6.33819600 | 1.68284600  | -1.46951500 |
| C | -1.48952800 | 3.63975700  | 2.98122700  |
| H | -2.30071600 | 3.46812000  | 2.25796400  |
| H | -1.15361700 | 4.68238300  | 2.89350400  |
| H | -1.89612100 | 3.50322900  | 3.99467700  |
| C | -0.67778200 | -5.16654400 | -0.12111700 |
| H | -1.05944900 | -5.62323200 | -1.03629400 |
| C | -4.77225600 | -3.14354200 | 0.37235100  |
| H | -4.89472400 | -3.46403000 | -0.67153700 |
| H | -5.53476500 | -3.66102500 | 0.97939200  |
| H | -3.78308100 | -3.49239800 | 0.70709700  |
| C | 0.82999700  | 2.95009200  | 3.68222900  |
| H | 0.50965200  | 2.81434100  | 4.72627400  |
| H | 1.18213200  | 3.98527600  | 3.57321000  |
| H | 1.66062500  | 2.25787300  | 3.48372300  |
| C | 2.17981100  | -5.52259900 | -1.69053400 |
| H | 2.91200500  | -5.65124100 | -0.88058700 |
| H | 2.74109100  | -5.42107200 | -2.63287000 |
| H | 1.57867100  | -6.44429100 | -1.75124500 |
| C | 1.94613600  | 5.47568100  | 1.57998400  |
| H | 2.73437600  | 4.74140000  | 1.74505700  |
| C | -0.24208700 | -2.24001100 | 3.95787900  |
| H | -0.44449900 | -1.55278400 | 3.12580700  |

|   |             |             |             |
|---|-------------|-------------|-------------|
| H | 0.17005500  | -1.65405300 | 4.79372300  |
| H | -1.20738800 | -2.66446400 | 4.27760400  |
| C | 2.13237300  | 6.80414000  | 1.95633300  |
| H | 3.07416400  | 7.10649000  | 2.41995400  |
| C | 5.17719000  | 2.20951100  | -1.54818600 |
| H | 5.64947100  | 3.12650600  | -1.18665300 |
| C | 4.31292100  | 0.90089900  | -3.36754300 |
| H | 4.10675400  | 0.79407200  | -4.43382600 |
| C | 1.12253300  | 7.74194300  | 1.74472300  |
| H | 1.27090500  | 8.78256600  | 2.04281600  |
| C | 4.03735800  | 2.50948100  | 1.34498400  |
| H | 4.20975100  | 3.47286400  | 0.83762400  |
| H | 4.13420600  | 2.66423200  | 2.43093600  |
| H | 3.00278300  | 2.19335400  | 1.14766000  |
| C | 2.31939000  | -1.07772300 | -4.19653300 |
| H | 2.87040100  | -0.78302900 | -5.10373600 |
| H | 1.60190700  | -0.28198300 | -3.94719500 |
| H | 1.74027100  | -1.97750000 | -4.44855900 |
| C | 4.26389000  | -2.45766100 | -3.37765700 |
| H | 3.74809200  | -3.34286600 | -3.78194300 |
| H | 4.83851400  | -2.78534000 | -2.49944900 |
| H | 4.97567000  | -2.10284600 | -4.14053900 |
| C | 4.94158800  | 2.05241200  | -2.90771900 |
| H | 5.23276000  | 2.83660600  | -3.61076900 |
| C | -0.25946400 | 4.73987100  | -2.46059600 |
| H | -0.05932000 | 5.07554500  | -3.48938300 |
| H | -0.35085600 | 5.63394400  | -1.82846100 |
| H | -1.21746100 | 4.19782500  | -2.44886300 |
| C | 2.18925100  | 4.60084000  | -1.87075700 |
| H | 2.98718800  | 3.94807200  | -1.48697500 |
| H | 2.09910500  | 5.47959900  | -1.21748900 |
| H | 2.48870500  | 4.95361000  | -2.86896100 |
| C | 0.92349800  | -4.35816400 | 4.65633900  |
| H | -0.02974200 | -4.83039000 | 4.94267000  |
| H | 1.32981200  | -3.86630500 | 5.55404600  |
| H | 1.61425200  | -5.16535500 | 4.36864800  |
| C | 6.46912100  | 1.89453100  | 1.18270200  |
| H | 7.21459300  | 1.17909600  | 0.80334200  |
| H | 6.59954900  | 1.97125200  | 2.27319500  |
| H | 6.71304200  | 2.87949500  | 0.75385200  |

## VI.3.5 compound 3, P

|    |             |             |             |
|----|-------------|-------------|-------------|
| O  | 1           |             |             |
| Ga | 2.68473800  | -0.15364700 | -0.39192200 |
| Fe | -1.97196900 | 2.27685200  | -0.94416000 |
| Cl | 3.28580700  | 1.02847200  | -2.16440300 |
| P  | -0.66423200 | -1.03283000 | -1.01446100 |
| P  | -1.03617800 | 0.72209400  | -2.51463700 |
| P  | 0.14727800  | 2.37282500  | -1.88674400 |
| P  | 0.01731200  | 2.08240400  | 0.25351400  |
| P  | 0.56323500  | -0.05867000 | 0.52747200  |
| Si | -2.35232400 | 0.24113500  | -0.24772800 |
| N  | 3.31165200  | -1.96747300 | -0.77740900 |
| N  | 4.06882000  | 0.28484400  | 0.92298600  |
| N  | -3.05031500 | -0.36237900 | 1.40414600  |
| N  | -3.87695300 | -0.85859400 | -0.53361600 |
| C  | -2.79848100 | 3.85374500  | 0.16006600  |
| C  | -2.08434900 | 4.34937300  | -0.97074300 |
| C  | -2.68504600 | 3.79820000  | -2.15570300 |
| C  | -3.76284100 | 2.96206700  | -1.75187500 |
| C  | -3.82182000 | 2.97473400  | -0.31565400 |
| C  | -2.55748400 | 4.29872300  | 1.56498800  |
| H  | -2.74656300 | 5.38103900  | 1.65708800  |
| H  | -1.51824000 | 4.11221800  | 1.87658700  |
| H  | -3.22339300 | 3.79093300  | 2.27518600  |
| C  | -0.99014800 | 5.36247000  | -0.90190700 |
| H  | -1.41079200 | 6.37188800  | -0.75428400 |
| H  | -0.38878900 | 5.37324700  | -1.82063800 |
| H  | -0.30772800 | 5.15579800  | -0.06388600 |
| C  | -2.30758800 | 4.10143700  | -3.56683500 |
| H  | -2.94984300 | 4.89677400  | -3.98122600 |
| H  | -2.41181600 | 3.21248400  | -4.20611300 |
| H  | -1.26219600 | 4.43062900  | -3.63899800 |
| C  | -4.74264500 | 2.31262600  | -2.66723300 |
| H  | -5.54430600 | 3.02008200  | -2.94062200 |
| H  | -5.21661000 | 1.44082900  | -2.19813900 |
| H  | -4.26487400 | 1.97840100  | -3.59875400 |
| C  | -4.90693700 | 2.36283700  | 0.50855200  |

|   |             |             |             |
|---|-------------|-------------|-------------|
| H | -5.75726300 | 3.05857000  | 0.60792100  |
| H | -4.55549200 | 2.11453400  | 1.51820400  |
| H | -5.28216300 | 1.43699800  | 0.04975200  |
| C | -2.76460200 | -0.22271300 | 2.84432200  |
| C | -1.98150000 | -1.44682100 | 3.32666600  |
| H | -1.65052000 | -1.29937800 | 4.36593400  |
| H | -1.09192200 | -1.59175100 | 2.69825400  |
| H | -2.59410600 | -2.35813400 | 3.29506800  |
| C | -4.03690500 | -0.04300100 | 3.67986900  |
| H | -3.74990200 | 0.21564800  | 4.70973700  |
| H | -4.64851800 | -0.95248600 | 3.72751000  |
| H | -4.65990000 | 0.77497400  | 3.28784200  |
| C | -1.89159800 | 1.01615400  | 3.02283600  |
| H | -1.69964800 | 1.18642200  | 4.09211700  |
| H | -2.37413900 | 1.90731400  | 2.60580200  |
| H | -0.92095200 | 0.89180300  | 2.52358300  |
| C | -3.98839200 | -1.07012800 | 0.77952100  |
| C | -5.00371300 | -1.92920300 | 1.44361200  |
| C | -4.67269200 | -3.20227000 | 1.91767800  |
| H | -3.66493900 | -3.59263600 | 1.76165000  |
| C | -5.63063500 | -3.97405200 | 2.57191000  |
| H | -5.36673000 | -4.96970200 | 2.93576900  |
| C | -6.91993600 | -3.47772400 | 2.76136200  |
| H | -7.66823200 | -4.08255500 | 3.27897100  |
| C | -7.25367700 | -2.20915500 | 2.28690600  |
| H | -8.26230600 | -1.81603800 | 2.43336600  |
| C | -6.30091000 | -1.43788300 | 1.62659400  |
| H | -6.55507100 | -0.43983000 | 1.26280200  |
| C | -4.42281600 | -1.68381300 | -1.63234400 |
| C | -3.78361200 | -1.21473000 | -2.93645600 |
| H | -4.25702800 | -1.73023200 | -3.78481600 |
| H | -2.71010400 | -1.44962200 | -2.96217100 |
| H | -3.89573100 | -0.13426000 | -3.08064100 |
| C | -4.05507600 | -3.16087500 | -1.44055300 |
| H | -4.32291600 | -3.72797400 | -2.34494700 |
| H | -4.58826100 | -3.61622200 | -0.59575400 |
| H | -2.97010700 | -3.26233600 | -1.28193700 |
| C | -5.94255400 | -1.51955600 | -1.73373300 |
| H | -6.31702400 | -2.06631600 | -2.61213800 |
| H | -6.21514200 | -0.46017700 | -1.85237400 |
| H | -6.45909000 | -1.91618400 | -0.84999800 |
| C | 2.41507900  | -2.93935600 | -1.32642400 |
| C | 1.66031600  | -3.73820400 | -0.43605100 |
| C | 0.79964000  | -4.69806300 | -0.97287500 |
| H | 0.21239000  | -5.32892400 | -0.30401200 |
| C | 0.65689200  | -4.85134000 | -2.34763100 |
| H | -0.02659600 | -5.60466100 | -2.74728800 |
| C | 1.36548100  | -4.02488600 | -3.20707300 |
| H | 1.22502300  | -4.12227800 | -4.28638900 |
| C | 2.25030700  | -3.05507400 | -2.72221900 |
| C | 1.74909500  | -3.53970700 | 1.06699400  |
| H | 1.88397600  | -2.45821900 | 1.23091400  |
| C | 0.46309900  | -3.92826200 | 1.78997600  |
| H | 0.50471700  | -3.59932500 | 2.83859600  |
| H | 0.30509300  | -5.01876500 | 1.79798100  |
| H | -0.41106300 | -3.45401300 | 1.31844900  |
| C | 2.95457300  | -4.24862300 | 1.68643700  |
| H | 2.96730800  | -4.10285800 | 2.77852000  |
| H | 3.90586300  | -3.86196000 | 1.29552800  |
| H | 2.91645000  | -5.33241400 | 1.49010400  |
| C | 2.93852500  | -2.13410600 | -3.71122700 |
| H | 3.64015700  | -1.49540300 | -3.15523600 |
| C | 1.91202400  | -1.20655100 | -4.36562600 |
| H | 2.41389600  | -0.46655600 | -5.00746100 |
| H | 1.33338900  | -0.65039800 | -3.61484500 |
| H | 1.20096300  | -1.77664100 | -4.98547500 |
| C | 3.73270300  | -2.89545700 | -4.77377700 |
| H | 4.27621500  | -2.18918100 | -5.42038300 |
| H | 3.07472400  | -3.49424100 | -5.42353100 |
| H | 4.46963500  | -3.58368800 | -4.33121900 |
| C | 5.14257700  | -3.51602700 | -1.23149100 |
| H | 6.18439300  | -3.68725300 | -0.93631800 |
| H | 5.08561100  | -3.47815400 | -2.32928100 |
| H | 4.53010200  | -4.37390400 | -0.91887900 |
| C | 4.61199300  | -2.23569200 | -0.65020000 |
| C | 5.52900900  | -1.39783400 | 0.00895900  |
| H | 6.56668600  | -1.72887300 | -0.01198600 |
| C | 5.26772300  | -0.27506000 | 0.81834100  |



|   |            |             |             |
|---|------------|-------------|-------------|
| C | 6.42718000 | 0.30925600  | 1.57545100  |
| H | 7.15692300 | -0.46331000 | 1.84929400  |
| H | 6.10125700 | 0.84592700  | 2.47560300  |
| H | 6.93530000 | 1.03864900  | 0.92372800  |
| C | 3.74411700 | 1.25805000  | 1.91807300  |
| C | 3.91603900 | 2.63450200  | 1.66847800  |
| C | 3.49802700 | 3.53980200  | 2.65027200  |
| H | 3.61953900 | 4.61073800  | 2.46956100  |
| C | 2.92682900 | 3.10667500  | 3.83872800  |
| H | 2.60192300 | 3.83256400  | 4.58825600  |
| C | 2.76542200 | 1.74461500  | 4.07093600  |
| H | 2.31591300 | 1.40995000  | 5.00803000  |
| C | 3.16382000 | 0.79914700  | 3.12358900  |
| C | 4.53504100 | 3.16412400  | 0.38958500  |
| H | 4.77553000 | 2.30326400  | -0.25132900 |
| C | 3.54966000 | 4.03592500  | -0.38904600 |
| H | 3.98396000 | 4.33452900  | -1.35551400 |
| H | 3.29749700 | 4.95282800  | 0.16859700  |
| H | 2.61613600 | 3.49507400  | -0.59553400 |
| C | 5.83324300 | 3.92405900  | 0.67129600  |
| H | 6.31080000 | 4.23144700  | -0.27237100 |
| H | 6.55366900 | 3.31281100  | 1.23573200  |
| H | 5.64547900 | 4.83690300  | 1.25940400  |
| C | 3.01968800 | -0.68429600 | 3.40864200  |
| H | 2.98277500 | -1.19608300 | 2.43508400  |
| C | 1.73290200 | -1.02827400 | 4.14979200  |
| H | 1.62048500 | -2.12071800 | 4.22654300  |
| H | 0.85863700 | -0.63108200 | 3.61570900  |
| H | 1.72673800 | -0.63282700 | 5.17796300  |
| C | 4.24260500 | -1.22125700 | 4.15620800  |
| H | 4.14272300 | -2.30304600 | 4.33920300  |
| H | 4.35605800 | -0.71916600 | 5.13073700  |
| H | 5.17067000 | -1.06379000 | 3.58891900  |

### VI.3.6 compound 3, As analogue (= compound 5)

|     |             |             |             |
|-----|-------------|-------------|-------------|
| 0 1 |             |             |             |
| As  | -0.55074800 | 0.74071300  | 0.65220600  |
| Ga  | -2.70012600 | 0.56921000  | -0.43472000 |
| As  | 0.02130400  | -1.59615400 | 1.13727200  |
| As  | 0.79395700  | 1.07595600  | -1.31655900 |
| As  | 0.96599100  | -1.29399800 | -2.23602900 |
| As  | -0.36427700 | -2.69010000 | -0.91829700 |
| Fe  | 1.94992300  | -2.31276400 | -0.15396600 |
| Cl  | -2.77318400 | 0.03206200  | -2.58057300 |
| Si  | 2.43968100  | -0.16091700 | -0.17371200 |
| N   | -4.20136200 | -0.40432900 | 0.37479000  |
| N   | 4.04256400  | 0.65053500  | -0.84337800 |
| N   | -3.54765200 | 2.34825100  | -0.34932400 |
| N   | 3.29608000  | 0.87709300  | 1.17558000  |
| C   | -5.43389100 | 0.09413500  | 0.31831200  |
| C   | 2.87042300  | -3.40572600 | 1.37412700  |
| C   | -3.92286400 | -1.70536000 | 0.89974100  |
| C   | -1.24402700 | 5.06530400  | -1.44520000 |
| H   | -0.87212100 | 5.52115300  | -2.36625400 |
| C   | 3.85143800  | -2.83871100 | 0.49856300  |
| C   | 2.08051500  | 0.32870800  | 3.20313200  |
| H   | 2.45070200  | -0.70017200 | 3.12858100  |
| H   | 1.09503400  | 0.37750700  | 2.72119600  |
| H   | 1.94215000  | 0.57835300  | 4.26508500  |
| C   | -2.19771800 | 4.04396700  | -1.52988700 |
| C   | -2.66055300 | 3.46679600  | -0.32981500 |
| C   | 4.65274000  | 0.96712600  | -2.15077700 |
| C   | -5.74316500 | 1.39826000  | -0.10888800 |
| H   | -6.80598300 | 1.63689700  | -0.14888500 |
| C   | -2.16458600 | -0.70565900 | 4.16479400  |
| H   | -2.51287500 | -1.38122300 | 4.96286600  |
| H   | -1.96465500 | 0.27101800  | 4.63070800  |
| H   | -1.21556700 | -1.09614000 | 3.76797000  |
| C   | -2.72471000 | 3.31866700  | 2.22034800  |
| H   | -3.04191700 | 2.28902500  | 1.99241300  |
| C   | -0.76136700 | 5.50483000  | -0.22002300 |
| H   | -0.01243700 | 6.29982200  | -0.17888800 |
| C   | 7.65891700  | 2.51732000  | 1.32919500  |
| H   | 8.62861200  | 2.09922200  | 1.60900000  |
| C   | 4.24633400  | 1.25869300  | 0.32371700  |
| C   | 5.36269400  | 2.19042500  | 0.63920700  |
| C   | 6.61109900  | 1.66504700  | 0.99044700  |
| H   | 6.75196600  | 0.58214400  | 1.01385600  |

|   |             |             |             |
|---|-------------|-------------|-------------|
| C | -6.02117300 | -3.61325900 | -1.32878300 |
| H | -6.52490400 | -3.47880300 | -2.29902700 |
| H | -6.71918500 | -3.31174800 | -0.53454400 |
| H | -5.83191300 | -4.69145600 | -1.20355600 |
| C | -5.49343300 | 3.81210300  | -0.62467200 |
| H | -4.81723600 | 4.64046800  | -0.37768300 |
| H | -6.43848300 | 3.93330000  | -0.07973200 |
| H | -5.71595800 | 3.87635500  | -1.70201700 |
| C | -4.09730500 | -2.85494300 | 0.09926500  |
| C | -4.86971100 | 2.47209500  | -0.34737300 |
| C | -1.23467400 | 4.93171600  | 0.95670800  |
| H | -0.85165600 | 5.28353800  | 1.91664800  |
| C | -3.38790200 | -1.79352900 | 2.20722800  |
| C | 2.49514000  | -4.22829000 | -0.75859500 |
| C | 2.81111600  | -3.28138200 | 2.86045400  |
| H | 3.49176500  | -2.50432100 | 3.23265900  |
| H | 3.11118800  | -4.23165800 | 3.33347800  |
| H | 1.79587600  | -3.04111300 | 3.21084900  |
| C | -2.18432400 | 3.90840500  | 0.92910900  |
| C | 4.33237700  | 1.33216000  | 3.40440100  |
| H | 4.06360400  | 1.50844800  | 4.45637700  |
| H | 5.03142700  | 2.12321200  | 3.10733800  |
| C | -3.96790100 | 4.07683000  | 2.69339700  |
| H | -3.72411400 | 5.12997800  | 2.90800900  |
| H | -4.36959800 | 3.62496300  | 3.61438500  |
| H | -4.76819400 | 4.06505600  | 1.94114100  |
| C | -4.71151000 | -2.81768400 | -1.29049400 |
| H | -4.93038400 | -1.76795300 | -1.53806200 |
| C | -3.75762700 | -3.33376700 | -2.36742700 |
| H | -3.46390300 | -4.37910900 | -2.18040300 |
| H | -2.84820100 | -2.72229100 | -2.42026200 |
| H | -4.24540800 | -3.29211900 | -3.35404300 |
| C | -3.03407700 | -3.05373300 | 2.69336100  |
| H | -2.60980200 | -3.14485700 | 3.69394100  |
| C | -6.60329800 | -0.75838100 | 0.73090400  |
| H | -7.07631400 | -1.17883100 | -0.16990000 |
| H | -7.35804600 | -0.15376900 | 1.25077100  |
| H | -6.29987800 | -1.59472700 | 1.37274400  |
| C | 1.98519500  | -5.04632500 | -1.89786900 |
| H | 0.95558700  | -5.38575400 | -1.72334600 |
| H | 2.62050800  | -5.93587200 | -2.04871100 |
| H | 1.98399100  | -4.47062400 | -2.83520600 |
| C | 4.52175200  | 2.46052000  | -2.47774100 |
| H | 5.17743500  | 3.08403400  | -1.85667800 |
| H | 3.47925900  | 2.78725700  | -2.34213600 |
| H | 4.80030100  | 2.63223300  | -3.52849700 |
| C | -1.59720400 | 3.11130200  | -3.80103700 |
| H | -2.01577400 | 2.76076800  | -4.75712900 |
| H | -1.06451000 | 2.26784200  | -3.34195100 |
| H | -0.86405800 | 3.90353300  | -4.02388400 |
| C | -3.20523200 | -0.54905300 | 3.06085500  |
| H | -2.83787300 | 0.24407600  | 2.38709100  |
| C | 3.62669700  | -3.36864100 | -0.81720300 |
| C | 6.12660900  | 0.54865000  | -2.18528800 |
| H | 6.53971400  | 0.72601700  | -3.18968500 |
| H | 6.23874400  | -0.52186300 | -1.95914400 |
| H | 6.73196000  | 1.12119900  | -1.47058700 |
| C | 2.40072100  | 2.70548500  | 2.55676700  |
| H | 2.08861300  | 2.98008200  | 3.57619300  |
| H | 1.50924600  | 2.70710600  | 1.91152900  |
| H | 3.09822000  | 3.47600800  | 2.20152700  |
| C | 2.02361900  | -4.25158900 | 0.59937500  |
| C | -1.68960100 | 3.23882900  | 3.33802600  |
| H | -0.78572800 | 2.70939200  | 3.00304900  |
| H | -2.10772800 | 2.69280700  | 4.19789000  |
| H | -1.39733300 | 4.23624500  | 3.70368800  |
| C | 3.89140100  | 0.19377800  | -3.22338000 |
| H | 2.86822800  | 0.57890700  | -3.33971000 |
| H | 3.82683600  | -0.87377100 | -2.98515000 |
| H | 4.39978400  | 0.30435600  | -4.19230500 |
| C | -2.71501600 | 3.62225300  | -2.89292700 |
| C | 4.50101600  | -3.19719300 | -2.01188700 |
| H | 5.17469500  | -4.06420300 | -2.12274100 |
| H | 5.12929400  | -2.30167800 | -1.93177200 |
| H | 3.91221700  | -3.11562700 | -2.93680300 |
| C | 3.05089100  | 1.31650500  | 2.56228000  |
| C | 0.93594400  | -5.10813000 | 1.15970500  |
| H | 0.23002100  | -5.42902900 | 0.38167100  |

|   |             |             |             |
|---|-------------|-------------|-------------|
| H | 0.35508600  | -4.57198800 | 1.92540000  |
| H | 1.36200700  | -6.01078000 | 1.63038800  |
| C | 7.46908500  | 3.89907500  | 1.31472800  |
| H | 8.29133900  | 4.56736400  | 1.58120900  |
| C | -4.52990200 | -0.05957000 | 3.65158900  |
| H | -5.26423300 | 0.19510700  | 2.87622100  |
| H | -4.36773500 | 0.84453300  | 4.26022400  |
| H | -4.97328200 | -0.83094200 | 4.30163100  |
| C | 5.17705400  | 3.57611400  | 0.62120300  |
| H | 4.20860900  | 3.98804600  | 0.33046300  |
| C | 5.04487500  | -2.05076200 | 0.92965100  |
| H | 5.42705300  | -1.42514200 | 0.11252800  |
| H | 5.85685700  | -2.72539800 | 1.24985300  |
| H | 4.80642000  | -1.38590700 | 1.77060900  |
| C | 6.22865400  | 4.42623400  | 0.95700700  |
| H | 6.07697600  | 5.50792900  | 0.93757900  |
| C | -3.71471600 | -4.09084000 | 0.63386100  |
| H | -3.83192500 | -4.99074900 | 0.02508600  |
| C | -3.18910400 | -4.19540800 | 1.91380000  |
| H | -2.89127600 | -5.17065500 | 2.30681700  |
| C | -3.47449200 | 4.76797400  | -3.56810800 |
| H | -2.80049600 | 5.60663200  | -3.80672300 |
| H | -3.92536500 | 4.42671100  | -4.51332400 |
| H | -4.27740300 | 5.16520000  | -2.92972100 |
| H | -3.41270500 | 2.78473100  | -2.74314000 |
| H | 4.85512800  | 0.36498400  | 3.34754500  |

## VI.3.7 compound 4, P analogue

|     |             |             |             |
|-----|-------------|-------------|-------------|
| O 1 |             |             |             |
| P   | 0.12056200  | -0.81268200 | 1.81734100  |
| P   | 0.06827000  | -1.50230400 | -0.80430100 |
| P   | -0.46369500 | 0.48673300  | 0.07790700  |
| P   | 2.23425900  | -0.59395300 | 2.19171000  |
| P   | 2.17879900  | -1.41873200 | -1.26885700 |
| Ga  | -2.77675400 | 0.26924200  | 0.30778400  |
| Fe  | 1.40991200  | -2.44589600 | 0.81129900  |
| Cl  | -3.55499900 | -1.15563000 | 1.82570600  |
| Si  | 2.93195100  | 0.00159400  | 0.21842600  |
| N   | 3.50794700  | 1.74334300  | -0.24044000 |
| N   | -3.60783000 | 1.98592100  | 0.74336000  |
| N   | 4.79083100  | 0.04676300  | 0.07574700  |
| N   | -3.92295300 | -0.11467900 | -1.25423100 |
| C   | 0.17084700  | -4.04409200 | 1.13253100  |
| C   | 1.07029900  | -4.33434100 | 0.05816200  |
| C   | -1.31556400 | -4.06664500 | 1.05580700  |
| H   | -1.76832200 | -3.33148000 | 1.73497900  |
| H   | -1.70364900 | -5.06534500 | 1.31884800  |
| H   | -1.66184500 | -3.82630100 | 0.04152200  |
| C   | 0.95308800  | -3.79742100 | 2.30510300  |
| C   | 2.40670700  | -4.29877800 | 0.57713300  |
| C   | 2.33272500  | -3.97571800 | 1.96205400  |
| C   | 1.85095500  | 3.31544100  | 0.51321000  |
| H   | 1.13592500  | 2.49341600  | 0.66366900  |
| H   | 1.26993100  | 4.21650400  | 0.27073600  |
| H   | 2.38639100  | 3.48740400  | 1.45904800  |
| C   | 4.76388600  | 1.32058500  | -0.31962400 |
| C   | 2.83997700  | 2.99657900  | -0.60996200 |
| C   | -2.82997500 | 2.99991900  | 1.38031300  |
| C   | -5.60166700 | 1.45286300  | -0.50012000 |
| H   | -6.63488800 | 1.75562900  | -0.66875100 |
| C   | -2.59003200 | 2.95602100  | 2.76894700  |
| C   | 2.11431200  | 2.74708600  | -1.93511400 |
| H   | 2.83745900  | 2.48143600  | -2.72189500 |
| H   | 1.56793800  | 3.64597400  | -2.25470000 |
| H   | 1.39631500  | 1.92065300  | -1.83399900 |
| C   | 5.93413800  | 2.08794900  | -0.81144100 |
| C   | 0.44170400  | -3.53197600 | 3.68184900  |
| H   | 1.06539800  | -2.79075400 | 4.20463600  |
| H   | 0.44667300  | -4.45746100 | 4.28307900  |
| H   | -0.58549500 | -3.14359600 | 3.66242800  |
| C   | 3.61317200  | -4.69320200 | -0.20890100 |
| H   | 3.65439300  | -4.15955200 | -1.16975400 |
| H   | 3.58394300  | -5.77377500 | -0.42830300 |
| H   | 4.54639700  | -4.49039200 | 0.33048000  |
| C   | 0.70013700  | -4.72794100 | -1.33358300 |
| H   | -0.29799200 | -4.35810000 | -1.60723500 |
| H   | 0.69871000  | -5.82634300 | -1.43985900 |
| H   | 1.41278900  | -4.32000000 | -2.06629500 |

|   |             |             |             |
|---|-------------|-------------|-------------|
| C | -4.88370100 | 2.21747100  | 0.42545900  |
| C | 3.44449000  | -3.95164800 | 2.95925500  |
| H | 4.41713300  | -4.16459500 | 2.49842900  |
| H | 3.26909800  | -4.71883500 | 3.73120700  |
| H | 3.51178000  | -2.97753500 | 3.46658100  |
| C | 6.69574500  | 2.87205300  | 0.05879800  |
| H | 6.42466400  | 2.92775300  | 1.11553400  |
| C | -2.45383800 | -0.79807000 | -3.07683700 |
| C | -2.01574800 | 0.64433800  | -3.26124700 |
| H | -2.02864100 | 1.11944700  | -2.26620500 |
| C | -3.45644500 | -1.13715200 | -2.13881600 |
| C | -1.21505100 | 3.93772100  | -1.69667900 |
| H | -1.40383600 | 3.90918800  | -2.78132200 |
| H | -0.70071500 | 3.01075000  | -1.40764500 |
| H | -0.52975300 | 4.77832600  | -1.50144900 |
| C | -5.11675300 | 0.45075600  | -1.36758000 |
| C | -2.27452200 | 4.02144500  | 0.57581000  |
| C | -1.90184300 | -1.81625900 | -3.85567300 |
| H | -1.11590600 | -1.57893200 | -4.57356800 |
| C | -3.91651100 | -2.46662600 | -2.00483700 |
| C | -6.04621100 | 0.04729800  | -2.47957600 |
| H | -5.54685600 | -0.57020000 | -3.23560000 |
| H | -6.46693700 | 0.94116800  | -2.96081900 |
| H | -6.88731300 | -0.52711400 | -2.06272500 |
| C | 6.27624100  | 2.00826800  | -2.16445300 |
| H | 5.67203100  | 1.39837000  | -2.84054200 |
| C | -5.06438800 | -2.87180000 | -1.09263400 |
| H | -5.38467600 | -1.98268500 | -0.52900700 |
| C | -0.59987800 | 0.79190500  | -3.80667000 |
| H | 0.12443600  | 0.21116300  | -3.21558900 |
| H | -0.29563900 | 1.84852200  | -3.77733300 |
| H | -0.52888400 | 0.46461000  | -4.85637200 |
| C | 7.79707300  | 3.57256300  | -0.42452600 |
| H | 8.39242300  | 4.18421100  | 0.25726900  |
| C | 3.79259400  | 4.18176500  | -0.76483500 |
| H | 4.37428000  | 4.35858000  | 0.15103800  |
| H | 3.18635300  | 5.07965800  | -0.95546300 |
| H | 4.49024200  | 4.06554900  | -1.60461900 |
| C | -3.01457100 | 1.40685700  | -4.13573000 |
| H | -3.07567800 | 0.95499700  | -5.13885800 |
| H | -2.70542800 | 2.45748800  | -4.25449500 |
| H | -4.02469500 | 1.40373000  | -3.70337300 |
| C | 5.86859900  | -0.94832100 | 0.11186500  |
| C | -1.46562900 | 4.98295500  | 1.18613300  |
| H | -1.02929800 | 5.77965100  | 0.57737000  |
| C | -1.75916200 | 3.93325300  | 3.32811400  |
| H | -1.55460000 | 3.90490900  | 4.40135500  |
| C | -3.22086400 | 1.90942100  | 3.66697800  |
| H | -3.86111800 | 1.27102400  | 3.04072600  |
| C | -1.19831800 | 4.93833700  | 2.55033000  |
| H | -0.55288700 | 5.69188300  | 3.00838600  |
| C | -5.57652300 | 3.39035800  | 1.05819000  |
| H | -5.49523100 | 3.32677700  | 2.15319000  |
| H | -6.63481100 | 3.43080300  | 0.77441100  |
| H | -5.09378500 | 4.33397300  | 0.76670100  |
| C | -2.52042300 | 4.09647600  | -0.92194800 |
| H | -3.16718800 | 3.25150100  | -1.20113300 |
| C | -3.31825200 | -3.44856300 | -2.80381600 |
| H | -3.65238400 | -4.48484900 | -2.70833300 |
| C | 8.14056400  | 3.49362900  | -1.77472400 |
| H | 9.00568000  | 4.04453600  | -2.15123200 |
| C | 7.37929800  | 2.71239600  | -2.64353300 |
| H | 7.64444200  | 2.65037900  | -3.70148500 |
| C | -2.16888800 | 1.00309300  | 4.30439800  |
| H | -1.55459900 | 0.49461500  | 3.54662100  |
| H | -2.65428100 | 0.22012200  | 4.90720300  |
| H | -1.49403200 | 1.57248200  | 4.96431600  |
| C | 5.45398100  | -1.95702700 | 1.17755200  |
| H | 5.42726700  | -1.48595400 | 2.17132400  |
| H | 6.16135500  | -2.79911800 | 1.20562100  |
| H | 4.44694000  | -2.34134600 | 0.96639100  |
| C | -6.25065600 | -3.38667100 | -1.91698400 |
| H | -6.54274000 | -2.69249800 | -2.71728700 |
| H | -7.12615500 | -3.55287800 | -1.26949200 |
| H | -6.00754800 | -4.34944300 | -2.39423300 |
| C | -4.66259800 | -3.92164000 | -0.05805600 |
| H | -4.28661900 | -4.84025800 | -0.53622000 |
| H | -5.53473800 | -4.19865500 | 0.55471300  |

|   |             |             |             |
|---|-------------|-------------|-------------|
| H | -3.89149400 | -3.53374000 | 0.61586000  |
| C | -2.31835100 | -3.13520500 | -3.71406800 |
| H | -1.86091200 | -3.92153600 | -4.31937100 |
| C | -4.10927200 | 2.55270000  | 4.73438500  |
| H | -3.52136200 | 3.16416700  | 5.43765600  |
| H | -4.62391700 | 1.77610900  | 5.32143300  |
| H | -4.87685700 | 3.20701800  | 4.29222800  |
| C | 7.22225700  | -0.35185700 | 0.50267200  |
| H | 7.65807800  | 0.27502100  | -0.28577200 |
| H | 7.92344100  | -1.17724900 | 0.69676100  |
| H | 7.14000700  | 0.24603500  | 1.42263800  |
| C | 5.96852800  | -1.63201200 | -1.25545600 |
| H | 4.99626100  | -2.05813900 | -1.54508200 |
| H | 6.71332700  | -2.44215800 | -1.22761300 |
| H | 6.27625500  | -0.91212800 | -2.02904000 |
| C | -3.24136700 | 5.38349200  | -1.32581700 |
| H | -2.62899500 | 6.27252500  | -1.10548700 |
| H | -4.19952000 | 5.50324900  | -0.79860300 |
| H | -3.45098200 | 5.38428800  | -2.40717900 |

### VI.3.8 compound 4, As

|     |             |             |             |
|-----|-------------|-------------|-------------|
| 0 1 |             |             |             |
| As  | 0.02710500  | -0.78906000 | 1.88200000  |
| As  | -0.03706500 | -1.48905000 | -0.87779000 |
| As  | -0.67266300 | 0.70015300  | 0.04571800  |
| As  | 2.34319300  | -0.42076600 | 2.22867200  |
| As  | 2.26183300  | -1.26624700 | -1.42458100 |
| Ga  | -3.03557100 | 0.24259900  | 0.23373800  |
| Fe  | 1.52641600  | -2.38194800 | 0.77591900  |
| Cl  | -3.68629300 | -1.33971000 | 1.65900000  |
| Si  | 2.95336000  | 0.26261000  | 0.14022400  |
| N   | 3.41726700  | 2.04539600  | -0.30753300 |
| N   | -4.03408200 | 1.85054400  | 0.73236700  |
| N   | 4.80891600  | 0.42787400  | -0.03310100 |
| N   | -4.10876600 | -0.14963500 | -1.38147100 |
| C   | 0.40840200  | -4.06421600 | 1.15654700  |
| C   | 1.26232000  | -4.29129200 | 0.03030200  |
| C   | -1.07488500 | -4.20936300 | 1.17130100  |
| H   | -1.55771900 | -3.48347300 | 1.84069400  |
| H   | -1.36009000 | -5.22278700 | 1.50156300  |
| H   | -1.49575900 | -4.05372200 | 0.16976100  |
| C   | 1.23693700  | -3.76767900 | 2.28434800  |
| C   | 2.62044800  | -4.16115200 | 0.47274700  |
| C   | 2.60391700  | -3.84593600 | 1.86129200  |
| C   | 1.73382500  | 3.51783500  | 0.58749000  |
| H   | 1.08160200  | 2.65234300  | 0.77314400  |
| H   | 1.08524400  | 4.38512600  | 0.39443900  |
| H   | 2.31685800  | 3.70992500  | 1.50079300  |
| C   | 4.69691000  | 1.70590100  | -0.40174000 |
| C   | 2.66856400  | 3.27326700  | -0.60043000 |
| C   | -3.34499700 | 2.87562700  | 1.44758700  |
| C   | -5.93837000 | 1.22552200  | -0.59947500 |
| H   | -6.98933700 | 1.44689300  | -0.78419400 |
| C   | -3.19124300 | 2.80059500  | 2.84647800  |
| C   | 1.87556600  | 3.02534400  | -1.88667300 |
| H   | 2.55988500  | 2.82144500  | -2.72475700 |
| H   | 1.26605000  | 3.90478400  | -2.14088500 |
| H   | 1.20573200  | 2.16104000  | -1.77275200 |
| C   | 5.81322900  | 2.55839600  | -0.88012000 |
| C   | 0.78853800  | -3.56780800 | 3.69416300  |
| H   | 1.38625600  | -2.79608000 | 4.20297200  |
| H   | 0.89500100  | -4.50292700 | 4.27075000  |
| H   | -0.26495100 | -3.26038300 | 3.74574500  |
| C   | 3.81124900  | -4.47877300 | -0.37017600 |
| H   | 3.72935500  | -4.02703700 | -1.36917500 |
| H   | 3.90055900  | -5.57069400 | -0.50186500 |
| H   | 4.74578400  | -4.12308200 | 0.08072400  |
| C   | 0.84459500  | -4.73030600 | -1.33475400 |
| H   | -0.19663700 | -4.45407100 | -1.55313700 |
| H   | 0.93102000  | -5.82601900 | -1.43400200 |
| H   | 1.47484900  | -4.27519800 | -2.11393900 |
| C   | -5.31482600 | 1.99575200  | 0.38868800  |
| C   | 3.76999100  | -3.77291400 | 2.79166800  |
| H   | 4.72728500  | -3.83696000 | 2.25991900  |
| H   | 3.73118300  | -4.61522500 | 3.50263600  |
| H   | 3.76816200  | -2.84204500 | 3.37757900  |
| C   | 6.53962900  | 3.35377800  | 0.00999400  |
| H   | 6.28037500  | 3.35384300  | 1.07121000  |

|   |             |             |             |
|---|-------------|-------------|-------------|
| C | -2.55917200 | -0.56730800 | -3.22142900 |
| C | -2.24762000 | 0.91686300  | -3.30091400 |
| H | -2.30515300 | 1.31462800  | -2.27414500 |
| C | -3.52907000 | -1.06219900 | -2.31770400 |
| C | -1.59176700 | 4.20253500  | -1.51159100 |
| H | -1.73001300 | 4.19492900  | -2.60406300 |
| H | -0.90715600 | 3.38550800  | -1.24525400 |
| H | -1.10438000 | 5.15579900  | -1.25086100 |
| C | -5.34587000 | 0.31381300  | -1.49942800 |
| C | -2.77088400 | 3.93312600  | 0.70444400  |
| C | -1.91187900 | -1.47450700 | -4.06260000 |
| H | -1.15210800 | -1.11593400 | -4.75798000 |
| C | -3.85130000 | -2.43677800 | -2.27149300 |
| C | -6.21140300 | -0.11836500 | -2.65186900 |
| H | -5.63932000 | -0.63449200 | -3.43208800 |
| H | -6.72064900 | 0.75143400  | -3.08939500 |
| H | -6.99020700 | -0.80362900 | -2.28391200 |
| C | 6.14082100  | 2.55033300  | -2.23900700 |
| H | 5.56325700  | 1.93280100  | -2.93127500 |
| C | -4.93294800 | -3.01395800 | -1.37284200 |
| H | -5.33470500 | -2.19819700 | -0.75319700 |
| C | -0.84373700 | 1.21699500  | -3.81464800 |
| H | -0.08077600 | 0.64945900  | -3.25995600 |
| H | -0.62219900 | 2.28791200  | -3.69853700 |
| H | -0.73893600 | 0.97930700  | -4.88540100 |
| C | 7.59071400  | 4.13644200  | -0.45901700 |
| H | 8.15787200  | 4.75708300  | 0.23852500  |
| C | 3.55008700  | 4.50877300  | -0.78092200 |
| H | 4.16800900  | 4.70355600  | 0.10681800  |
| H | 2.88941100  | 5.37622300  | -0.92628900 |
| H | 4.20929900  | 4.44013100  | -1.65631200 |
| C | -3.29976000 | 1.65750200  | -4.12980500 |
| H | -3.31765900 | 1.27858500  | -5.16436400 |
| H | -3.07675300 | 2.73582700  | -4.16642900 |
| H | -4.30884300 | 1.54109500  | -3.71076900 |
| C | 5.94713600  | -0.49881300 | -0.04884700 |
| C | -2.05138000 | 4.91388400  | 1.39168500  |
| H | -1.60690800 | 5.74218600  | 0.83374100  |
| C | -2.45124200 | 3.80156300  | 3.48532100  |
| H | -2.31650100 | 3.75317400  | 4.56887900  |
| C | -3.79732900 | 1.67868700  | 3.66687600  |
| H | -4.36202500 | 1.02889000  | 2.98168600  |
| C | -1.88607500 | 4.85077500  | 2.77139500  |
| H | -1.31224600 | 5.62205100  | 3.29108400  |
| C | -6.13036500 | 3.04789800  | 1.08507600  |
| H | -6.24729900 | 2.76979800  | 2.14414400  |
| H | -7.12410000 | 3.15384200  | 0.63415900  |
| H | -5.62138400 | 4.02151000  | 1.07560800  |
| C | -2.93296400 | 4.03565700  | -0.80295500 |
| H | -3.36899800 | 3.08830600  | -1.15419400 |
| C | -3.16408000 | -3.30170600 | -3.13182700 |
| H | -3.39504800 | -4.36964500 | -3.10492900 |
| C | 7.92003500  | 4.12787900  | -1.81501500 |
| H | 8.74590800  | 4.74280400  | -2.18039900 |
| C | 7.19423400  | 3.33549300  | -2.70378900 |
| H | 7.44792200  | 3.32862400  | -3.76635400 |
| C | -2.71306100 | 0.81519500  | 4.31092700  |
| H | -2.02308800 | 0.40682400  | 3.55861800  |
| H | -3.16499900 | -0.03871400 | 4.83856400  |
| H | -2.12012300 | 1.39279000  | 5.03875600  |
| C | 5.60877400  | -1.58631700 | 0.96582500  |
| H | 5.56418400  | -1.17177900 | 1.98385700  |
| H | 6.37071200  | -2.37980800 | 0.94305600  |
| H | 4.62682700  | -2.02755100 | 0.74414900  |
| C | -6.07512500 | -3.60801700 | -2.20472200 |
| H | -6.46629100 | -2.90050700 | -2.94924700 |
| H | -6.90748300 | -3.91450900 | -1.55165500 |
| H | -5.73941500 | -4.50371000 | -2.75146700 |
| C | -4.38849900 | -4.06756400 | -0.40994400 |
| H | -3.94970000 | -4.92202700 | -0.94987400 |
| H | -5.19979900 | -4.45591600 | 0.22545300  |
| H | -3.62710900 | -3.63725400 | 0.24997800  |
| C | -2.20175900 | -2.83376000 | -4.01500500 |
| H | -1.67201600 | -3.52963100 | -4.66998800 |
| C | -4.77159000 | 2.21037400  | 4.71996500  |
| H | -4.25549400 | 2.82138600  | 5.47788000  |
| H | -5.25987400 | 1.37525900  | 5.24608000  |
| H | -5.55860600 | 2.83778300  | 4.27343900  |

|   |             |             |             |
|---|-------------|-------------|-------------|
| C | 7.26149700  | 0.16532200  | 0.36820100  |
| H | 7.65408000  | 0.85143000  | -0.39315900 |
| H | 8.01510400  | -0.62029100 | 0.52794900  |
| H | 7.14209700  | 0.71775100  | 1.31218800  |
| C | 6.08929700  | -1.11107100 | -1.44615100 |
| H | 5.15714000  | -1.61334800 | -1.74616900 |
| H | 6.90398800  | -1.85136000 | -1.45928200 |
| H | 6.32252000  | -0.33521500 | -2.19084400 |
| C | -3.89957900 | 5.15628000  | -1.19153600 |
| H | -3.52282500 | 6.13648800  | -0.85704800 |
| H | -4.89515100 | 5.01229300  | -0.74743300 |
| H | -4.02414700 | 5.19809300  | -2.28534000 |

### VI.3.9 compound 7, As/Ge

|    |             |             |             |
|----|-------------|-------------|-------------|
| O  | 1           |             |             |
| As | -0.55074800 | 0.74071300  | 0.65220600  |
| Ga | -2.70012600 | 0.56921000  | -0.43472000 |
| As | 0.02130400  | -1.59615400 | 1.13727200  |
| As | 0.79395700  | 1.07595600  | -1.31655900 |
| As | 0.96599100  | -1.29399800 | -2.23602900 |
| As | -0.36427700 | -2.69010000 | -0.91829700 |
| Fe | 1.94992300  | -2.31276400 | -0.15396600 |
| Cl | -2.77318400 | 0.03206200  | -2.58057300 |
| Si | 2.43968100  | -0.16091700 | -0.17371200 |
| N  | -4.20136200 | -0.40432900 | 0.37479000  |
| N  | 4.04256400  | 0.65053500  | -0.84337800 |
| N  | -3.54765200 | 2.34825100  | -0.34932400 |
| N  | 3.29608000  | 0.87709300  | 1.17558000  |
| C  | -5.43389100 | 0.09413500  | 0.31831200  |
| C  | 2.87042300  | -3.40572600 | 1.37412700  |
| C  | -3.92286400 | -1.70536000 | 0.89974100  |
| C  | -1.24402700 | 5.06530400  | -1.44520000 |
| H  | -0.87212100 | 5.52115300  | -2.36625400 |
| C  | 3.85143800  | -2.83871100 | 0.49856300  |
| C  | 2.08051500  | 0.32870800  | 3.20313200  |
| H  | 2.45070200  | -0.70017200 | 3.12858100  |
| H  | 1.09503400  | 0.37750700  | 2.72119600  |
| H  | 1.94215000  | 0.57835300  | 4.26508500  |
| C  | -2.19771800 | 4.04396700  | -1.52988700 |
| C  | -2.66055300 | 3.46679600  | -0.32981500 |
| C  | 4.65274000  | 0.96712600  | -2.15077700 |
| C  | -5.74316500 | 1.39826000  | -0.10888800 |
| H  | -6.80598300 | 1.63689700  | -0.14888500 |
| C  | -2.16458600 | -0.70565900 | 4.16479400  |
| H  | -2.51287500 | -1.38122300 | 4.96286600  |
| H  | -1.96465500 | 0.27101800  | 4.63070800  |
| H  | -1.21556700 | -1.09614000 | 3.76797000  |
| C  | -2.72471000 | 3.31866700  | 2.22034800  |
| H  | -3.04191700 | 2.28902500  | 1.99241300  |
| C  | -0.76136700 | 5.50483000  | -0.22002300 |
| H  | -0.01243700 | 6.29982200  | -0.17888800 |
| C  | 7.65891700  | 2.51732000  | 1.32919500  |
| H  | 8.62861200  | 2.09922200  | 1.60900000  |
| C  | 4.24633400  | 1.25869300  | 0.32371700  |
| C  | 5.36269400  | 2.19042500  | 0.63920700  |
| C  | 6.61109900  | 1.66504700  | 0.99044700  |
| H  | 6.75196600  | 0.58214400  | 1.01385600  |
| C  | -6.02117300 | -3.61325900 | -1.32878300 |
| H  | -6.52490400 | -3.47880300 | -2.29902700 |
| H  | -6.71918500 | -3.31174800 | -0.53454400 |
| H  | -5.83191300 | -4.69145600 | -1.20355600 |
| C  | -5.49343300 | 3.81210300  | -0.62467200 |
| H  | -4.81723600 | 4.64046800  | -0.37768300 |
| H  | -6.43848300 | 3.93330000  | -0.07973200 |
| H  | -5.71595800 | 3.87635500  | -1.70201700 |
| C  | -4.09730500 | -2.85494300 | 0.09926500  |
| C  | -4.86971100 | 2.47209500  | -0.34737300 |
| C  | -1.23467400 | 4.93171600  | 0.95670800  |
| H  | -0.85165600 | 5.28353800  | 1.91664800  |
| C  | -3.38790200 | -1.79352900 | 2.20722800  |
| C  | 2.49514000  | -4.22829000 | -0.75859500 |
| C  | 2.81111600  | -3.28138200 | 2.86045400  |
| H  | 3.49176500  | -2.50432100 | 3.23265900  |
| H  | 3.11118800  | -4.23165800 | 3.33347800  |
| H  | 1.79587600  | -3.04111300 | 3.21084900  |
| C  | -2.18432400 | 3.90840500  | 0.92910900  |
| C  | 4.33237700  | 1.33216000  | 3.40440100  |
| H  | 4.06360400  | 1.50844800  | 4.45637700  |

|   |             |             |             |
|---|-------------|-------------|-------------|
| H | 5.03142700  | 2.12321200  | 3.10733800  |
| C | -3.96790100 | 4.07683000  | 2.69339700  |
| H | -3.72411400 | 5.12997800  | 2.90800900  |
| H | -4.36959800 | 3.62496300  | 3.61438500  |
| H | -4.76819400 | 4.06505600  | 1.94114100  |
| C | -4.71151000 | -2.81768400 | -1.29049400 |
| H | -4.93038400 | -1.76795300 | -1.53806200 |
| C | -3.75762700 | -3.33376700 | -2.36742700 |
| H | -3.46390300 | -4.37910900 | -2.18040300 |
| H | -2.84820100 | -2.72229100 | -2.42026200 |
| H | -4.24540800 | -3.29211900 | -3.35404300 |
| C | -3.03407700 | -3.05373300 | 2.69336100  |
| H | -2.60980200 | -3.14485700 | 3.69394100  |
| C | -6.60329800 | -0.75838100 | 0.73090400  |
| H | -7.07631400 | -1.17883100 | -0.16990000 |
| H | -7.35804600 | -0.15376900 | 1.25077100  |
| H | -6.29987800 | -1.59472700 | 1.37274400  |
| C | 1.98519500  | -5.04632500 | -1.89786900 |
| H | 0.95558700  | -5.38575400 | -1.72334600 |
| H | 2.62050800  | -5.93587200 | -2.04871100 |
| H | 1.98399100  | -4.47062400 | -2.83520600 |
| C | 4.52175200  | 2.46052000  | -2.47774100 |
| H | 5.17743500  | 3.08403400  | -1.85667800 |
| H | 3.47925900  | 2.78725700  | -2.34213600 |
| H | 4.80030100  | 2.63223300  | -3.52849700 |
| C | -1.59720400 | 3.11130200  | -3.80103700 |
| H | -2.01577400 | 2.76076800  | -4.75712900 |
| H | -1.06451000 | 2.26784200  | -3.34195100 |
| H | -0.86405800 | 3.90353300  | -4.02388400 |
| C | -3.20523200 | -0.54905300 | 3.06085500  |
| H | -2.83787300 | 0.24407600  | 2.38709100  |
| C | 3.62669700  | -3.36864100 | -0.81720300 |
| C | 6.12660900  | 0.54865000  | -2.18528800 |
| H | 6.53971400  | 0.72601700  | -3.18968500 |
| H | 6.23874400  | -0.52186300 | -1.95914400 |
| H | 6.73196000  | 1.12119900  | -1.47058700 |
| C | 2.40072100  | 2.70548500  | 2.55676700  |
| H | 2.08861300  | 2.98008200  | 3.57619300  |
| H | 1.50924600  | 2.70710600  | 1.91152900  |
| H | 3.09822000  | 3.47600800  | 2.20152700  |
| C | 2.02361900  | -4.25158900 | 0.59937500  |
| C | -1.68960100 | 3.23882900  | 3.33802600  |
| H | -0.78572800 | 2.70939200  | 3.00304900  |
| H | -2.10772800 | 2.69280700  | 4.19789000  |
| H | -1.39733300 | 4.23624500  | 3.70368800  |
| C | 3.89140100  | 0.19377800  | -3.22338000 |
| H | 2.86822800  | 0.57890700  | -3.33971000 |
| H | 3.82683600  | -0.87377100 | -2.98515000 |
| H | 4.39978400  | 0.30435600  | -4.19230500 |
| C | -2.71501600 | 3.62225300  | -2.89292700 |
| C | 4.50101600  | -3.19719300 | -2.01188700 |
| H | 5.17469500  | -4.06420300 | -2.12274100 |
| H | 5.12929400  | -2.30167800 | -1.93177200 |
| H | 3.91221700  | -3.11562700 | -2.93680300 |
| C | 3.05089100  | 1.31650500  | 2.56228000  |
| C | 0.93594400  | -5.10813000 | 1.15970500  |
| H | 0.23002100  | -5.42902900 | 0.38167100  |
| H | 0.35508600  | -4.57198800 | 1.92540000  |
| H | 1.36200700  | -6.01078000 | 1.63038800  |
| C | 7.46908500  | 3.89907500  | 1.31472800  |
| H | 8.29133900  | 4.56736400  | 1.58120900  |
| C | -4.52990200 | -0.05957000 | 3.65158900  |
| H | -5.26423300 | 0.19510700  | 2.87622100  |
| H | -4.36773500 | 0.84453300  | 4.26022400  |
| H | -4.97328200 | -0.83094200 | 4.30163100  |
| C | 5.17705400  | 3.57611400  | 0.62120300  |
| H | 4.20860900  | 3.98804600  | 0.33046300  |
| C | 5.04487500  | -2.05076200 | 0.92965100  |
| H | 5.42705300  | -1.42514200 | 0.11252800  |
| H | 5.85685700  | -2.72539800 | 1.24985300  |
| H | 4.80642000  | -1.38590700 | 1.77060900  |
| C | 6.22865400  | 4.42623400  | 0.95700700  |
| H | 6.07697600  | 5.50792900  | 0.93757900  |
| C | -3.71471600 | -4.09084000 | 0.63386100  |
| H | -3.83192500 | -4.99074900 | 0.02508600  |
| C | -3.18910400 | -4.19540800 | 1.91380000  |
| H | -2.89127600 | -5.17065500 | 2.30681700  |
| C | -3.47449200 | 4.76797400  | -3.56810800 |



|   |             |            |             |
|---|-------------|------------|-------------|
| H | -2.80049600 | 5.60663200 | -3.80672300 |
| H | -3.92536500 | 4.42671100 | -4.51332400 |
| H | -4.27740300 | 5.16520000 | -2.92972100 |
| H | -3.41270500 | 2.78473100 | -2.74314000 |
| H | 4.85512800  | 0.36498400 | 3.34754500  |

## VI.4 Optimized structures: Model compounds and transition states

### VI.4.1 gallasilylene

|     |             |             |             |
|-----|-------------|-------------|-------------|
| 0 1 |             |             |             |
| Ga  | 0.47982900  | -0.30574100 | -0.05176400 |
| Cl  | 0.50087300  | -1.92843500 | 1.50767600  |
| Si  | -1.51113400 | -0.34949000 | -1.47296000 |
| N   | -2.68326500 | -0.76624800 | -0.02283800 |
| N   | 0.99371700  | 1.30826400  | 0.97298100  |
| N   | 2.23254200  | -0.49144700 | -0.95258700 |
| N   | -2.32526100 | 1.22507500  | -0.72662100 |
| C   | 2.17871300  | 1.87125200  | 0.88000500  |
| C   | 3.23183700  | 0.33990500  | -0.76220400 |
| C   | 3.24029400  | 1.46997400  | 0.06351800  |
| H   | 4.15521200  | 2.06008900  | 0.10039600  |
| C   | -3.06602800 | 0.48934500  | 0.09220900  |
| H   | -3.88242700 | 0.86080900  | 0.73310400  |
| H   | 2.35343000  | 2.75145800  | 1.51962900  |
| H   | 4.16326700  | 0.12065100  | -1.30849900 |
| C   | 0.03202400  | 1.80361000  | 1.92996800  |
| H   | -0.90569400 | 2.08241900  | 1.42232200  |
| H   | -0.20919200 | 1.01723200  | 2.66486200  |
| H   | 0.41572300  | 2.68348600  | 2.47251000  |
| C   | 2.40850300  | -1.65541200 | -1.78973800 |
| H   | 2.33352800  | -2.57512400 | -1.18540300 |
| H   | 1.61857800  | -1.69952400 | -2.55819600 |
| H   | 3.38819200  | -1.64701800 | -2.29522600 |
| C   | -2.53053100 | 2.60316500  | -1.05350900 |
| H   | -3.23642100 | 3.07243600  | -0.34787200 |
| H   | -1.58172200 | 3.16198300  | -1.00222600 |
| H   | -2.93659200 | 2.72780300  | -2.07189700 |
| C   | -3.11716600 | -1.88999300 | 0.75193700  |
| H   | -3.91261700 | -1.59371900 | 1.45536200  |
| H   | -3.51399900 | -2.68462100 | 0.10016500  |
| H   | -2.27295900 | -2.30470700 | 1.32693400  |

### VI.4.2 gallagermylene

|     |             |             |             |
|-----|-------------|-------------|-------------|
| 0 1 |             |             |             |
| Ga  | 0.66177000  | -0.27524500 | 0.07217600  |
| Cl  | 0.75882200  | -1.70104300 | 1.81054500  |
| Ge  | -1.45445600 | -0.48611500 | -1.26577000 |
| N   | -2.54769500 | -0.65001700 | 0.44424200  |
| N   | 1.23327300  | 1.44344400  | 0.87284100  |
| N   | 2.37223300  | -0.58571600 | -0.88101200 |
| N   | -2.23671200 | 1.26494200  | -0.53596900 |
| C   | 2.40761100  | 1.98780700  | 0.64132300  |
| C   | 3.37598500  | 0.26188200  | -0.85302100 |
| C   | 3.42186200  | 1.48874000  | -0.18197300 |
| H   | 4.33384500  | 2.07785700  | -0.27081800 |
| C   | -2.86877600 | 0.62285500  | 0.43125300  |
| H   | -3.57948300 | 1.09549700  | 1.13299200  |
| H   | 2.61642700  | 2.93744900  | 1.15987400  |
| H   | 4.27946100  | -0.02879200 | -1.41286900 |
| C   | 0.33170000  | 2.05167400  | 1.82362900  |
| H   | -0.63065700 | 2.28730800  | 1.34171600  |
| H   | 0.12759100  | 1.35097100  | 2.65054400  |
| H   | 0.75378700  | 2.97836600  | 2.24631400  |
| C   | 2.51495600  | -1.85267600 | -1.55912500 |
| H   | 2.45935100  | -2.68194800 | -0.83397500 |
| H   | 1.69905600  | -1.99585500 | -2.28769600 |
| H   | 3.47575200  | -1.92001800 | -2.09556900 |
| C   | -2.49356200 | 2.60890200  | -0.95153500 |
| H   | -3.12608700 | 3.13744900  | -0.21672600 |
| H   | -1.55331400 | 3.17626700  | -1.05339300 |
| H   | -3.01034600 | 2.64830400  | -1.92650200 |
| C   | -2.92225300 | -1.62053900 | 1.42738700  |
| H   | -3.61088000 | -1.18193600 | 2.17002400  |
| H   | -3.42955900 | -2.48014300 | 0.95968600  |

|   |             |             |            |
|---|-------------|-------------|------------|
| H | -2.02999400 | -1.99520700 | 1.95600600 |
|---|-------------|-------------|------------|

#### VI.4.3 CpFeP<sub>5</sub>

|     |             |             |             |
|-----|-------------|-------------|-------------|
| 0 1 |             |             |             |
| Fe  | -0.42158700 | 0.00044500  | 0.00079500  |
| P   | 1.11714400  | -1.80191800 | 0.15295600  |
| P   | 1.11859000  | -0.41098600 | 1.76018400  |
| P   | 1.11591500  | -0.70286900 | -1.66632900 |
| P   | 1.11761600  | 1.36689600  | -1.18348600 |
| P   | 1.11924600  | 1.54732500  | 0.93419000  |
| C   | -2.08734600 | 1.19001100  | -0.22122200 |
| C   | -2.08708200 | -0.83181500 | 0.87911000  |
| C   | -2.08705300 | 0.15707700  | -1.19951000 |
| C   | -2.08745200 | 0.57878900  | 1.06343000  |
| C   | -2.08689100 | -1.09243200 | -0.51946800 |
| H   | -2.05089300 | 1.09926000  | 2.01902000  |
| H   | -2.05025800 | -1.57979500 | 1.66939100  |
| H   | -2.04964000 | -2.07515000 | -0.98664500 |
| H   | -2.05000200 | 0.29793700  | -2.27846900 |
| H   | -2.05067000 | 2.25969700  | -0.42075300 |

#### VI.4.4 CpFeAs<sub>5</sub>

|     |             |             |             |
|-----|-------------|-------------|-------------|
| 0 1 |             |             |             |
| Fe  | -0.00000500 | 0.00109800  | -0.88894200 |
| As  | -0.39957900 | -1.93899900 | 0.68023000  |
| As  | -1.96726200 | -0.21984100 | 0.68151700  |
| As  | 1.72007800  | -0.97972200 | 0.68124000  |
| As  | 1.46259000  | 1.33251900  | 0.68368100  |
| As  | -0.81627100 | 1.80210600  | 0.68400700  |
| C   | 0.36318800  | 1.15727100  | -2.55799300 |
| C   | -0.97155200 | -0.71776800 | -2.56034800 |
| C   | 1.21037200  | 0.01460400  | -2.55896600 |
| C   | -0.98534100 | 0.70461500  | -2.55876400 |
| C   | 0.38544500  | -1.14420500 | -2.56047700 |
| H   | -1.87182600 | 1.33584200  | -2.53108800 |
| H   | -1.84583000 | -1.36583900 | -2.53404000 |
| H   | 0.73151600  | -2.17600800 | -2.53439200 |
| H   | 2.29859700  | 0.02490400  | -2.53132700 |
| H   | 0.68965500  | 2.19538800  | -2.52959700 |

#### VI.4.5 Int1<sup>M</sup> – P/Si

|     |             |             |             |
|-----|-------------|-------------|-------------|
| 0 1 |             |             |             |
| Ga  | -2.48776900 | -0.56646600 | -0.05792900 |
| Fe  | 3.13584600  | -0.23321300 | 0.06654600  |
| Cl  | -4.51389500 | 0.32605500  | -0.33999000 |
| P   | 0.63596000  | 0.84573900  | 1.73525600  |
| Si  | -1.04166100 | 1.28909200  | 0.38652300  |
| P   | 0.98758800  | -0.97156100 | 0.51782200  |
| P   | 2.49142800  | 1.80724400  | 1.00615200  |
| P   | 2.48312000  | 1.60655500  | -1.15172200 |
| P   | 1.42370100  | -0.23674400 | -1.50023400 |
| N   | -1.08374500 | 2.46831500  | -1.04725600 |
| N   | -2.55539200 | -1.88629900 | 1.35918000  |
| N   | -2.17957300 | -1.76638300 | -1.54341900 |
| N   | -2.14832900 | 2.74883200  | 0.80384600  |
| C   | 4.80909100  | -0.83779800 | -0.93724700 |
| C   | 4.04965900  | -1.85027600 | 0.98470900  |
| C   | 5.16640900  | -0.01077400 | 0.16690800  |
| C   | 4.12544800  | -1.97983200 | -0.43154100 |
| C   | -2.35735300 | -3.16427000 | 1.10891500  |
| C   | -2.04506800 | -3.06276200 | -1.35162400 |
| C   | -2.12302600 | -3.74977500 | -0.13736500 |
| H   | -1.98494900 | -4.82970300 | -0.16470400 |
| C   | -1.98098500 | 3.21105000  | -0.41673800 |
| C   | 4.69083200  | -0.63672600 | 1.35706400  |
| H   | -2.52364000 | 4.05651700  | -0.86618800 |
| H   | 3.70136600  | -2.78797900 | -1.02513600 |
| H   | 3.55889600  | -2.54596500 | 1.66306000  |
| H   | -2.38003800 | -3.83848600 | 1.97810300  |
| H   | -1.85328200 | -3.66679700 | -2.25084700 |
| H   | 4.78104900  | -0.24325200 | 2.36780000  |
| H   | 5.68028400  | 0.94749800  | 0.10883600  |
| H   | 5.00345200  | -0.62052700 | -1.98657900 |
| C   | -2.74404700 | -1.42657600 | 2.71649500  |
| H   | -1.90652100 | -0.77488900 | 3.02269900  |
| H   | -3.67776100 | -0.84674200 | 2.79862400  |

|   |             |             |             |
|---|-------------|-------------|-------------|
| H | -2.79581600 | -2.27149000 | 3.42123500  |
| C | -2.03940100 | -1.20979200 | -2.87082800 |
| H | -2.85835800 | -0.50133000 | -3.07193000 |
| H | -1.07596200 | -0.67796400 | -2.96190000 |
| H | -2.06686000 | -1.99939200 | -3.63810900 |
| C | -3.18420600 | 3.09334000  | 1.73556700  |
| H | -3.51970300 | 4.13000000  | 1.57647100  |
| H | -4.05081500 | 2.42078000  | 1.62099300  |
| H | -2.80104900 | 3.01139000  | 2.76276100  |
| C | -0.60672600 | 2.66236600  | -2.38920700 |
| H | -1.26829600 | 3.36350800  | -2.92176700 |
| H | 0.42200500  | 3.05317900  | -2.39444700 |
| H | -0.59715100 | 1.70658800  | -2.93107300 |

VI.4.6 Int2<sup>M</sup> – P/Si

|    |             |             |             |
|----|-------------|-------------|-------------|
| 0  | 1           |             |             |
| Ga | 2.09933100  | -0.02545800 | 0.07664700  |
| Fe | -1.83989400 | -1.44256700 | -0.12138300 |
| Cl | 3.56827700  | 1.58062300  | -0.27614900 |
| P  | 0.00912900  | 0.95589600  | 0.44116900  |
| Si | 0.33000200  | 3.23022900  | 0.97732100  |
| P  | -0.90243400 | -0.49245600 | 1.78700700  |
| P  | -1.09367200 | 0.41708200  | -1.36111000 |
| P  | -3.13379300 | 0.41228600  | -0.64284500 |
| P  | -3.00624800 | -0.14251200 | 1.42921700  |
| N  | -1.44929800 | 3.62488100  | 0.41581600  |
| N  | 2.28176000  | -1.34748600 | -1.32481600 |
| N  | 2.66213000  | -1.12402900 | 1.57114000  |
| N  | 0.25130700  | 3.58731700  | -0.89008700 |
| C  | -3.09358300 | -3.03705600 | -0.36128800 |
| C  | -0.81422700 | -3.22797000 | -0.06500200 |
| C  | -2.46419700 | -2.73955500 | -1.60320500 |
| C  | -2.07810600 | -3.34522700 | 0.58819500  |
| C  | 2.63544100  | -2.58666600 | -1.04554900 |
| C  | 2.94202600  | -2.39972900 | 1.41262400  |
| C  | 2.92461900  | -3.12056700 | 0.21300800  |
| H  | 3.19012300  | -4.17586600 | 0.25884700  |
| C  | -1.05058900 | 3.81707600  | -0.82638000 |
| C  | -1.05690100 | -2.85513800 | -1.41496700 |
| H  | -1.68888800 | 4.14241400  | -1.66315900 |
| H  | -2.23774000 | -3.59537400 | 1.63594900  |
| H  | 0.16409900  | -3.38106500 | 0.38774600  |
| H  | 2.71447400  | -3.27130700 | -1.90321000 |
| H  | 3.22639200  | -2.95205800 | 2.32068300  |
| H  | -0.29713800 | -2.66210600 | -2.16970100 |
| H  | -2.96758600 | -2.44383100 | -2.52209300 |
| H  | -4.16416700 | -3.00765300 | -0.16380500 |
| C  | 2.08003100  | -0.93856100 | -2.69943600 |
| H  | 1.05222300  | -0.56284300 | -2.83914100 |
| H  | 2.77757000  | -0.12556000 | -2.95873100 |
| H  | 2.24877900  | -1.77930500 | -3.39066000 |
| C  | 2.73855200  | -0.51012600 | 2.88065200  |
| H  | 3.40375400  | 0.36725100  | 2.84948000  |
| H  | 1.73807200  | -0.17427800 | 3.20141500  |
| H  | 3.12405600  | -1.21977600 | 3.62909000  |
| C  | 1.05935100  | 3.51075500  | -2.07140600 |
| H  | 0.73070000  | 4.24881200  | -2.82145600 |
| H  | 2.10863700  | 3.70817500  | -1.81611800 |
| H  | 1.00605200  | 2.50626600  | -2.52741900 |
| C  | -2.75879700 | 3.84161000  | 0.95638200  |
| H  | -3.46453800 | 4.11507900  | 0.15627200  |
| H  | -3.13376500 | 2.92342000  | 1.43408700  |
| H  | -2.75160300 | 4.64946600  | 1.70616900  |

VI.4.7 Int3<sup>M</sup> – P/Si

|    |             |             |             |
|----|-------------|-------------|-------------|
| 0  | 1           |             |             |
| Ga | 2.90676900  | -0.18665100 | 0.04138500  |
| Fe | -1.32130400 | 0.89519100  | 0.36378100  |
| Cl | 2.49538500  | 0.49189400  | 2.10669100  |
| P  | -0.33194700 | -1.15754100 | -0.05648800 |
| P  | -2.04525100 | -0.54479300 | -1.19404300 |
| P  | -1.70917800 | 1.46019900  | -1.87906900 |
| P  | 0.30333700  | 1.61424400  | -1.09204300 |
| P  | 1.17445000  | -0.39871200 | -1.50756800 |
| Si | -4.05462600 | -1.70539300 | -1.44986900 |
| N  | 4.37467200  | 0.92002200  | -0.61548400 |
| N  | 3.91341400  | -1.85256900 | 0.21014700  |

|   |             |             |             |
|---|-------------|-------------|-------------|
| N | -5.06836700 | -0.35910600 | -0.55320000 |
| N | -4.14466500 | -2.02765400 | 0.42977200  |
| C | -0.65275200 | 2.12168600  | 1.89214300  |
| C | -1.83545000 | 2.65770400  | 1.30692200  |
| C | -2.87330300 | 1.69248700  | 1.44861700  |
| C | -2.33303900 | 0.56436100  | 2.13466100  |
| C | -0.95947200 | 0.82952800  | 2.39855000  |
| C | -4.92438100 | -0.97805200 | 0.60197000  |
| C | 5.56805300  | 0.41565400  | -0.84568600 |
| C | 5.97494200  | -0.91058600 | -0.66387200 |
| H | 7.00484500  | -1.15725400 | -0.91871400 |
| C | 5.17685900  | -1.93649700 | -0.14753700 |
| H | 6.32904100  | 1.11927100  | -1.21722900 |
| H | 5.65491700  | -2.92033200 | -0.02127600 |
| H | -5.39197600 | -0.67592300 | 1.55460600  |
| H | -0.24539700 | 0.16159100  | 2.87564700  |
| H | -2.86110100 | -0.34836900 | 2.40189700  |
| H | -3.89617800 | 1.80865300  | 1.09553300  |
| H | -1.92430300 | 3.62187100  | 0.80878500  |
| H | 0.32944500  | 2.58828400  | 1.92531400  |
| C | -3.65382200 | -2.94043100 | 1.41757500  |
| H | -2.55478100 | -2.87497500 | 1.48828500  |
| H | -4.08071900 | -2.70852300 | 2.40681900  |
| H | -3.91957400 | -3.97898800 | 1.16474100  |
| C | -5.78740200 | 0.84727800  | -0.82904500 |
| H | -6.30112600 | 1.20991600  | 0.07601100  |
| H | -5.09866700 | 1.63601900  | -1.17540100 |
| H | -6.54582200 | 0.68766200  | -1.61173700 |
| C | 4.13286900  | 2.33604900  | -0.78920800 |
| H | 3.25625300  | 2.50290200  | -1.43620900 |
| H | 3.91262600  | 2.80678800  | 0.18323400  |
| H | 5.00605700  | 2.83826200  | -1.23559900 |
| C | 3.23275300  | -2.99420500 | 0.77792600  |
| H | 2.93382000  | -2.78219500 | 1.81786500  |
| H | 2.31298400  | -3.21644800 | 0.21136900  |
| H | 3.87527900  | -3.88934100 | 0.77065900  |

#### VI.4.8 Int4<sup>M</sup> – P/Si

|     |             |             |             |
|-----|-------------|-------------|-------------|
| 0 1 |             |             |             |
| Ga  | 2.78048300  | 0.00941600  | 0.00038800  |
| Fe  | -1.82363100 | -1.41181700 | -0.00072300 |
| Cl  | 2.74174500  | -2.19865600 | -0.00030900 |
| Si  | -2.49686200 | 1.35553000  | -0.00031600 |
| N   | -2.42346000 | 3.23835100  | -0.00005900 |
| N   | 3.94784100  | 0.56100300  | -1.46283600 |
| N   | -4.22403600 | 2.06420200  | 0.00041700  |
| N   | 3.94841400  | 0.55970100  | 1.46362100  |
| C   | -1.18127000 | -3.34137400 | -0.00330100 |
| C   | -1.98334500 | -3.09970000 | 1.14914900  |
| C   | -1.98721700 | -3.09766900 | -1.15259000 |
| C   | -3.28474700 | -2.71466600 | 0.70913700  |
| C   | -3.28716300 | -2.71330600 | -0.70749700 |
| C   | -3.73974300 | 3.29252800  | 0.00089700  |
| C   | 5.69815000  | 1.39796200  | 0.00041900  |
| H   | 6.68358800  | 1.86218100  | 0.00043200  |
| C   | 5.12235700  | 1.11102400  | -1.24225600 |
| C   | 5.12288500  | 1.10984000  | 1.24305600  |
| H   | 5.71546500  | 1.36703100  | 2.13486900  |
| H   | 5.71453100  | 1.36912800  | -2.13407600 |
| H   | -4.34456100 | 4.21384800  | 0.00203500  |
| H   | -4.12121700 | -2.43111700 | -1.34750500 |
| H   | -1.66096300 | -3.17051200 | -2.18927600 |
| H   | -0.12432400 | -3.60653300 | -0.00526800 |
| H   | -1.65355500 | -3.17439200 | 2.18458100  |
| H   | -4.11656400 | -2.43345300 | 1.35248000  |
| P   | 0.68265200  | 1.01948200  | 0.00077000  |
| P   | -0.21278000 | -0.51005000 | -1.38930800 |
| P   | -0.21343200 | -0.51097100 | 1.38935100  |
| P   | -2.21639800 | 0.18948000  | 1.80713200  |
| P   | -2.21562800 | 0.19019600  | -1.80806300 |
| C   | -5.58696200 | 1.62912900  | 0.00518000  |
| H   | -5.79631900 | 1.01859600  | 0.89800100  |
| H   | -6.27218800 | 2.49154100  | 0.00483800  |
| H   | -5.80091600 | 1.01434400  | -0.88356800 |
| C   | -1.46853400 | 4.30431200  | -0.00273300 |
| H   | -0.82444600 | 4.24321900  | -0.89360200 |
| H   | -1.97400500 | 5.28315300  | 0.00268300  |
| H   | -0.81483500 | 4.23822600  | 0.88067000  |

|   |            |             |             |
|---|------------|-------------|-------------|
| C | 3.50485900 | 0.28220800  | 2.81204700  |
| H | 4.24076200 | 0.62890700  | 3.55537500  |
| H | 2.54020200 | 0.77747900  | 3.01082200  |
| H | 3.34734400 | -0.80051500 | 2.94510600  |
| C | 3.50351200 | 0.28519400  | -2.81135200 |
| H | 2.53947200 | 0.78193800  | -3.00948400 |
| H | 4.23968800 | 0.63145100  | -3.55461600 |
| H | 3.34447600 | -0.79720200 | -2.94520700 |

VI.4.9 Int5<sup>M</sup> – P/Si

|    |             |             |             |
|----|-------------|-------------|-------------|
| 0  | 1           |             |             |
| Fe | -0.84541700 | 2.03462600  | 0.09161100  |
| P  | 0.35794600  | 1.31925900  | -1.72320600 |
| P  | -1.66367300 | 2.00770100  | -2.12066300 |
| P  | -2.74218900 | 1.03720800  | -0.54568400 |
| P  | -1.11021700 | -0.23302600 | 0.45920700  |
| P  | 0.05822000  | -0.84841400 | -1.34190100 |
| Ga | 2.02739700  | -1.08392300 | -0.08680900 |
| Cl | 2.59080800  | -3.20918900 | 0.12142900  |
| Si | -2.75044700 | -1.53134400 | -0.90321300 |
| N  | -2.11248000 | -3.10029400 | 0.02575400  |
| C  | -3.18746200 | -3.10669200 | 0.78510100  |
| N  | -3.87230000 | -1.99588500 | 0.58490100  |
| C  | -1.10263700 | -4.11120300 | -0.07952300 |
| H  | -1.40491000 | -5.02414300 | 0.46060800  |
| H  | -0.13802200 | -3.76810600 | 0.32866600  |
| H  | -0.93180100 | -4.37467800 | -1.13421900 |
| H  | -3.48937400 | -3.93666100 | 1.44727400  |
| C  | -5.15564800 | -1.64816400 | 1.11744600  |
| H  | -5.26425600 | -0.55361600 | 1.11081000  |
| H  | -5.98845200 | -2.07186500 | 0.52905400  |
| H  | -5.25927300 | -1.99273200 | 2.15946000  |
| C  | 0.72201900  | 3.04872200  | 0.98618100  |
| H  | 1.77864400  | 2.86382200  | 0.79945500  |
| C  | -0.12059300 | 3.94508400  | 0.26598400  |
| H  | 0.17605500  | 4.56293300  | -0.58035200 |
| C  | -1.43282800 | 3.85608900  | 0.81492800  |
| H  | -2.30791200 | 4.40166000  | 0.46450600  |
| C  | -1.40271400 | 2.91423400  | 1.88344100  |
| H  | -2.24974900 | 2.61060600  | 2.49659000  |
| C  | -0.07385100 | 2.41187900  | 1.97852300  |
| H  | 0.26859300  | 1.64968200  | 2.67595900  |
| N  | 2.25894800  | -0.34482400 | 1.70328100  |
| C  | 3.14018300  | 0.60497400  | 1.94397300  |
| C  | 3.99680000  | 1.21768500  | 1.02585400  |
| C  | 4.13056600  | 0.85231300  | -0.31908900 |
| N  | 3.46300800  | -0.08690100 | -0.95140800 |
| C  | 1.53991900  | -0.95646900 | 2.80072600  |
| H  | 1.82176000  | -2.01829700 | 2.89102500  |
| H  | 0.45325000  | -0.91032700 | 2.61838100  |
| H  | 1.76373200  | -0.44932000 | 3.75300600  |
| H  | 3.21010500  | 0.94689600  | 2.98796700  |
| H  | 4.64635500  | 2.00909800  | 1.39766600  |
| H  | 4.88050600  | 1.39957200  | -0.91000200 |
| C  | 3.71759800  | -0.34971700 | -2.35087100 |
| H  | 4.56455500  | 0.24915200  | -2.72096400 |
| H  | 3.94715500  | -1.41635700 | -2.50224800 |
| H  | 2.82747200  | -0.09895500 | -2.95282000 |

VI.4.10 Int6<sup>M</sup> – P/Si

|    |             |             |             |
|----|-------------|-------------|-------------|
| 0  | 1           |             |             |
| Ga | 2.27247600  | -0.01888500 | -0.05301800 |
| Fe | -2.00642100 | -1.43393800 | -0.03220700 |
| Cl | 1.97093600  | 1.35497500  | -1.78708300 |
| P  | -1.05074500 | 0.54756700  | 0.09803600  |
| P  | -2.86365700 | 0.33060900  | 1.26245500  |
| P  | -2.27990600 | -1.48287400 | 2.27588900  |
| P  | -0.28508100 | -1.84223400 | 1.50648700  |
| P  | 0.57877700  | 0.25098400  | 1.52444200  |
| Si | -1.08577200 | 2.36239200  | -1.41259900 |
| N  | 2.73226900  | -1.75088600 | -0.79297200 |
| N  | 4.02361500  | 0.38188000  | 0.71154900  |
| N  | -0.27092700 | 3.55587800  | -0.16958600 |
| N  | -2.39882000 | 3.35371600  | -0.39105100 |
| C  | -1.76166800 | -3.15212000 | -1.16117200 |
| C  | -2.99331400 | -3.21786500 | -0.45055900 |
| C  | -3.77982400 | -2.09790200 | -0.83765000 |

|   |             |             |             |
|---|-------------|-------------|-------------|
| C | -3.04080200 | -1.34283500 | -1.79239100 |
| C | -1.78736600 | -1.99649300 | -1.99277800 |
| C | -1.44423000 | 4.04070200  | 0.19715900  |
| C | 3.92036900  | -2.29237600 | -0.63078000 |
| C | 5.01065600  | -1.73658100 | 0.04651200  |
| H | 5.92426900  | -2.32719000 | 0.09912100  |
| C | 5.02255900  | -0.47585000 | 0.64778900  |
| H | 4.06592400  | -3.28722000 | -1.07837800 |
| H | 5.96477500  | -0.16140000 | 1.12213000  |
| H | -1.59360400 | 4.90810200  | 0.86279000  |
| H | -0.99628800 | -1.66071700 | -2.66112200 |
| H | -3.36700700 | -0.42230700 | -2.27508500 |
| H | -4.76246900 | -1.84197200 | -0.44440900 |
| H | -3.27212800 | -3.97248700 | 0.28262900  |
| H | -0.94169300 | -3.86212300 | -1.06798000 |
| C | -3.80894300 | 3.59512300  | -0.33224400 |
| H | -4.33128200 | 2.72244500  | 0.09301300  |
| H | -4.03085100 | 4.46964800  | 0.30115400  |
| H | -4.21963400 | 3.78757400  | -1.33666900 |
| C | 1.01621400  | 3.95055800  | 0.31635100  |
| H | 0.96933800  | 4.95182400  | 0.77604700  |
| H | 1.38850600  | 3.23971100  | 1.07493800  |
| H | 1.74324000  | 3.97110500  | -0.50730700 |
| C | 1.71988400  | -2.41952000 | -1.58041400 |
| H | 0.74656200  | -2.32884000 | -1.07512700 |
| H | 1.63005800  | -1.94615900 | -2.57279700 |
| H | 1.95529900  | -3.48710100 | -1.71528900 |
| C | 4.20883100  | 1.66546900  | 1.35049000  |
| H | 4.08994500  | 2.48119100  | 0.61799100  |
| H | 3.45450400  | 1.81142800  | 2.14140300  |
| H | 5.20966100  | 1.74750300  | 1.80357000  |

#### VI.4.11 Int7<sup>M</sup> – P/Si

|    |             |             |             |
|----|-------------|-------------|-------------|
| 0  | 1           |             |             |
| Ga | 2.17535300  | -0.52404300 | -0.01360300 |
| Fe | -2.51874200 | -0.87742800 | 0.14397400  |
| Cl | 1.62547400  | -0.37427400 | 2.13191100  |
| P  | 0.76370900  | 0.55127300  | -1.52069800 |
| P  | -1.77764800 | 0.97505900  | 1.27570800  |
| P  | -0.90830900 | -0.98329600 | -1.47105100 |
| Si | -0.17341900 | 1.77643400  | 0.04013300  |
| P  | -2.73273400 | 0.03385800  | -1.99743400 |
| P  | -3.28513700 | 1.25688400  | -0.28259500 |
| N  | 2.58234900  | -2.40039800 | -0.34866900 |
| N  | 0.91203800  | 3.02576800  | 0.92562600  |
| N  | 4.00050800  | 0.15397900  | -0.20737600 |
| N  | -0.49658700 | 3.49490200  | -0.63284600 |
| C  | -3.93042300 | -1.47648600 | 1.54812700  |
| C  | 3.79376800  | -2.79524500 | -0.67756500 |
| C  | 4.99589900  | -0.62743900 | -0.57474400 |
| C  | -4.23561800 | -2.01001900 | 0.26582100  |
| C  | -3.14034400 | -2.81734600 | -0.14994700 |
| C  | 4.93610300  | -2.00011400 | -0.82190200 |
| H  | 5.85660800  | -2.49702200 | -1.12541300 |
| C  | 0.36050500  | 4.00576400  | 0.21962400  |
| C  | -2.15139300 | -2.77842000 | 0.87847000  |
| C  | -2.63857800 | -1.94932300 | 1.92208800  |
| H  | 0.58440600  | 5.07794000  | 0.33795300  |
| H  | 5.97737000  | -0.14389900 | -0.69653700 |
| H  | 3.91855500  | -3.87460400 | -0.85254400 |
| H  | -4.55623100 | -0.79733400 | 2.12508100  |
| H  | -5.13277600 | -1.80362700 | -0.31595100 |
| H  | -3.05948300 | -3.34715200 | -1.09801900 |
| H  | -1.18606000 | -3.27844500 | 0.86267900  |
| H  | -2.10116100 | -1.69769700 | 2.83472000  |
| C  | 1.52790700  | -3.37831700 | -0.17233200 |
| H  | 1.16876000  | -3.35685400 | 0.86967800  |
| H  | 0.67409000  | -3.14235600 | -0.82937700 |
| H  | 1.88843000  | -4.39380000 | -0.40008600 |
| C  | 4.24592100  | 1.55153100  | 0.06461200  |
| H  | 3.43861800  | 2.16905200  | -0.36142200 |
| H  | 4.27160100  | 1.74243500  | 1.15093900  |
| H  | 5.20322300  | 1.88422900  | -0.36788400 |
| C  | -1.21431700 | 4.12978500  | -1.69766100 |
| H  | -2.27811200 | 3.85375700  | -1.64193600 |
| H  | -1.12252400 | 5.22497800  | -1.62991800 |
| H  | -0.83101900 | 3.79978700  | -2.67651700 |
| C  | 1.59950800  | 3.16576100  | 2.18142800  |

|   |            |            |            |
|---|------------|------------|------------|
| H | 2.22629000 | 4.07222700 | 2.18122300 |
| H | 0.89078500 | 3.22456000 | 3.02433200 |
| H | 2.23477500 | 2.28763500 | 2.35081800 |

VI.4.12 Int8<sup>M</sup> – P/Si

|    |             |             |             |
|----|-------------|-------------|-------------|
| 0  | 1           |             |             |
| Fe | 2.89314600  | -0.48299900 | 0.03594000  |
| P  | 2.66767500  | 1.60319600  | -1.08384900 |
| P  | 3.16970800  | -0.10149900 | -2.27162400 |
| P  | 2.16091700  | -1.90631200 | -1.67283100 |
| P  | 0.68518100  | -1.36694700 | -0.19877200 |
| P  | -0.72615100 | -0.00815600 | -1.37934800 |
| Si | 0.70216900  | 1.19626800  | -0.21993900 |
| Ga | -2.59370100 | -0.11936900 | 0.00721100  |
| Cl | -3.03615000 | 1.45248200  | 1.52932200  |
| N  | 0.32879600  | 1.48982000  | 1.56768000  |
| C  | -0.18718300 | 2.69452600  | 1.32517000  |
| N  | -0.05430100 | 2.96965900  | 0.05874200  |
| C  | 0.22189400  | 0.75423700  | 2.79434500  |
| H  | 0.20641700  | -0.31938900 | 2.56341300  |
| H  | 1.07088900  | 0.94254600  | 3.47315400  |
| H  | -0.71895800 | 1.00025800  | 3.31061500  |
| H  | -0.66479900 | 3.33197400  | 2.08195600  |
| C  | -0.48456100 | 4.13079900  | -0.65297700 |
| H  | -1.27739200 | 3.87135800  | -1.37407700 |
| H  | 0.35376900  | 4.56705400  | -1.21906000 |
| H  | -0.88056100 | 4.89708000  | 0.03247100  |
| C  | 3.05430400  | -1.09292800 | 2.00230100  |
| H  | 2.22052500  | -1.35546500 | 2.64948900  |
| C  | 3.74930700  | -1.99421200 | 1.14969200  |
| H  | 3.54043600  | -3.05635700 | 1.03491000  |
| C  | 4.75418400  | -1.25508100 | 0.45845500  |
| H  | 5.43356900  | -1.64757600 | -0.29634100 |
| C  | 4.67329000  | 0.09590900  | 0.88173700  |
| H  | 5.27954500  | 0.91871300  | 0.50661300  |
| C  | 3.61274200  | 0.20437200  | 1.83163300  |
| H  | 3.28754400  | 1.11878600  | 2.32486000  |
| N  | -4.14720600 | -0.08066900 | -1.18361000 |
| C  | -5.01834300 | -1.06495700 | -1.22455200 |
| C  | -5.00173900 | -2.22916200 | -0.45015900 |
| C  | -4.06289600 | -2.52258200 | 0.54247500  |
| N  | -3.01482100 | -1.80528900 | 0.89429600  |
| C  | -4.31488900 | 1.08231500  | -2.02435600 |
| H  | -3.42293000 | 1.22947100  | -2.65673800 |
| H  | -4.44168900 | 1.98595600  | -1.40509200 |
| H  | -5.19405200 | 0.98127500  | -2.68067200 |
| H  | -5.84748400 | -0.95553700 | -1.94054700 |
| H  | -5.79968600 | -2.95234700 | -0.61320400 |
| H  | -4.21621600 | -3.45716300 | 1.10328800  |
| C  | -2.19401600 | -2.23290300 | 2.00787000  |
| H  | -2.22056700 | -1.47672500 | 2.80993700  |
| H  | -2.55352000 | -3.18888300 | 2.42077600  |
| H  | -1.14752200 | -2.35740700 | 1.68373400  |

VI.4.13 Int9<sup>M</sup> – P/Si

|    |             |             |             |
|----|-------------|-------------|-------------|
| 0  | 1           |             |             |
| Ga | -2.60351000 | 0.07056000  | -0.05287000 |
| Fe | 2.52917400  | -0.82628200 | 0.17241900  |
| Cl | -2.50479000 | 2.23143600  | 0.45830500  |
| P  | 0.25204700  | 0.92640400  | -1.97439800 |
| P  | 2.30019300  | -0.21571200 | -2.14540200 |
| P  | 2.00407600  | -2.27188300 | -1.53097500 |
| P  | 0.48850400  | -1.89879400 | -0.01775300 |
| P  | -0.92577800 | -0.84279700 | -1.38172900 |
| Si | 1.38662900  | 0.98067300  | -0.06146500 |
| N  | -3.10705400 | -0.93616000 | 1.54281700  |
| N  | -4.31778300 | -0.09801100 | -0.98432500 |
| N  | 0.86133100  | 2.07418000  | 1.37984900  |
| N  | 2.26550100  | 2.64295300  | -0.14877700 |
| C  | 2.93496400  | -1.06476300 | 2.16954900  |
| C  | 3.44982600  | -2.16036400 | 1.42782600  |
| C  | 4.39815500  | -1.64972300 | 0.48610200  |
| C  | 4.46865300  | -0.24475100 | 0.64464800  |
| C  | 3.54933100  | 0.12645300  | 1.67210800  |
| C  | 1.63580400  | 3.04747700  | 0.93321100  |
| C  | -4.32892400 | -1.40943700 | 1.70157500  |
| C  | -5.40135000 | -1.31036400 | 0.81432000  |

|   |             |             |             |
|---|-------------|-------------|-------------|
| H | -6.34365100 | -1.76637300 | 1.11523000  |
| C | -5.35492300 | -0.69211600 | -0.44163000 |
| H | -4.51707500 | -1.95012900 | 2.64175300  |
| H | -6.27888900 | -0.71118900 | -1.04018900 |
| H | 1.74072200  | 4.03854900  | 1.40326800  |
| H | 3.40100900  | 1.13248000  | 2.06179400  |
| H | 5.07730400  | 0.43630200  | 0.05226700  |
| H | 4.94728700  | -2.23893800 | -0.24621200 |
| H | 3.16069300  | -3.20403300 | 1.54238800  |
| H | 2.18305200  | -1.12148900 | 2.95502500  |
| C | 3.03791800  | 3.40984400  | -1.07868300 |
| H | 2.46713500  | 3.60226300  | -2.00247300 |
| H | 3.33368500  | 4.37707900  | -0.64173400 |
| H | 3.94650400  | 2.85623500  | -1.35875600 |
| C | 0.16921500  | 2.02571900  | 2.63427900  |
| H | 0.41361500  | 2.90973600  | 3.24427600  |
| H | -0.91875200 | 2.00528300  | 2.47265800  |
| H | 0.46534900  | 1.12817000  | 3.20092100  |
| C | -2.11730700 | -1.15145900 | 2.57567900  |
| H | -1.22525600 | -1.64838200 | 2.15601900  |
| H | -1.79769200 | -0.19185000 | 3.01378600  |
| H | -2.51814800 | -1.78273200 | 3.38475900  |
| C | -4.41324400 | 0.49741900  | -2.29795500 |
| H | -4.23891700 | 1.58426500  | -2.23701900 |
| H | -3.64382000 | 0.07186300  | -2.96373900 |
| H | -5.40357400 | 0.32244300  | -2.74787600 |

VI.4.14 TS1<sup>M</sup> – P/Si

|     |             |             |             |
|-----|-------------|-------------|-------------|
| 0 1 |             |             |             |
| Ga  | 3.07190500  | -0.68638500 | -0.33893100 |
| Fe  | -3.68110100 | -0.00303600 | -0.01916000 |
| Cl  | 4.88269500  | -0.84127200 | -1.55668900 |
| P   | -0.77523700 | 1.46852300  | -0.34447600 |
| Si  | 1.85330500  | 1.39073100  | -0.27025400 |
| P   | -1.98729100 | 0.29310900  | -1.75393400 |
| P   | -1.80427600 | 0.64317000  | 1.41674900  |
| P   | -2.25610300 | -1.45250300 | 1.15350200  |
| P   | -2.37692700 | -1.68653800 | -0.97399600 |
| N   | 2.04880700  | 2.32335900  | 1.32199500  |
| N   | 1.71480300  | -1.97800700 | -0.85280400 |
| N   | 3.36501900  | -1.31707500 | 1.47074000  |
| N   | 2.58869100  | 3.03973900  | -0.63044200 |
| C   | -5.53458800 | -0.80048700 | 0.14999500  |
| C   | -5.11094600 | 1.26266500  | -0.78743700 |
| C   | -5.30696400 | 0.12658900  | 1.20917400  |
| C   | -5.41645600 | -0.09833400 | -1.08536500 |
| C   | 1.16648600  | -2.78064200 | 0.03292400  |
| C   | 2.58299000  | -2.24692600 | 2.00158600  |
| C   | 1.54234400  | -2.92590600 | 1.37717900  |
| H   | 0.97336500  | -3.63487500 | 1.97657900  |
| C   | 2.48143600  | 3.37743100  | 0.65043600  |
| C   | -5.04391300 | 1.40070400  | 0.62546200  |
| H   | 2.68925600  | 4.37225000  | 1.07164900  |
| H   | -5.50487600 | -0.53321800 | -2.07956700 |
| H   | -4.91594300 | 2.04750700  | -1.51620800 |
| H   | 0.32861400  | -3.39777200 | -0.32005000 |
| H   | 2.78465600  | -2.50346800 | 3.05245900  |
| H   | -4.78704500 | 2.30979500  | 1.16653400  |
| H   | -5.29716000 | -0.10677300 | 2.27254700  |
| H   | -5.73027400 | -1.86583500 | 0.26355500  |
| C   | 1.20148900  | -1.92577900 | -2.20568800 |
| H   | 0.72175800  | -0.94916600 | -2.39663000 |
| H   | 2.02091900  | -2.06520300 | -2.92815400 |
| H   | 0.43571000  | -2.69824700 | -2.37058600 |
| C   | 4.42873200  | -0.72547900 | 2.24989700  |
| H   | 5.40841300  | -0.91779500 | 1.78277700  |
| H   | 4.30276700  | 0.36970000  | 2.31199700  |
| H   | 4.44554400  | -1.12952800 | 3.27469400  |
| C   | 3.06445200  | 3.83559300  | -1.72603100 |
| H   | 3.37068800  | 4.83070700  | -1.36942100 |
| H   | 3.93200900  | 3.35840500  | -2.20772600 |
| H   | 2.27630400  | 3.96902100  | -2.48286100 |
| C   | 1.56722600  | 2.25965600  | 2.67548300  |
| H   | 1.77082700  | 3.20595600  | 3.19950300  |
| H   | 0.48098300  | 2.06708900  | 2.69063300  |
| H   | 2.06352200  | 1.44268500  | 3.22076300  |



VI.4.15 TS2<sup>M</sup> – P/Si

|    |             |             |             |  |
|----|-------------|-------------|-------------|--|
| 0  | 1           |             |             |  |
| Ga | 2.11212100  | -0.91628800 | -0.21770800 |  |
| Fe | -2.91099600 | -0.22693400 | -0.03993900 |  |
| Cl | 3.57118000  | -0.51755900 | -1.84426800 |  |
| P  | 0.00233200  | 0.50671300  | -0.77453000 |  |
| Si | 1.58899000  | 1.57226400  | 0.28622000  |  |
| P  | -0.84188600 | -0.32862800 | 1.07767100  |  |
| P  | -1.88997700 | 0.97603500  | -1.75383400 |  |
| P  | -2.87869700 | 2.10215100  | -0.18547700 |  |
| P  | -2.26318200 | 1.20367200  | 1.66982500  |  |
| N  | 1.20912200  | 3.23284400  | 1.04666500  |  |
| N  | 1.20434300  | -2.62442200 | -0.54060500 |  |
| N  | 3.15651000  | -1.54202500 | 1.31829000  |  |
| N  | 2.47849800  | 2.91813400  | -0.66309700 |  |
| C  | -4.87803100 | -0.61429600 | 0.35058000  |  |
| C  | -3.28728700 | -2.25806800 | 0.09913300  |  |
| C  | -4.61356400 | -0.75885300 | -1.04097500 |  |
| C  | -4.06390500 | -1.54526700 | 1.05660900  |  |
| C  | 1.29300300  | -3.63720000 | 0.29630300  |  |
| C  | 2.96455700  | -2.72233500 | 1.87307600  |  |
| C  | 2.09413300  | -3.72108600 | 1.43740500  |  |
| H  | 2.05030300  | -4.64156800 | 2.01792900  |  |
| C  | 1.98041700  | 3.82833300  | 0.15116400  |  |
| C  | -3.62376800 | -1.77583600 | -1.19540300 |  |
| H  | 2.18257200  | 4.91017300  | 0.10493200  |  |
| H  | -4.01691500 | -1.66430000 | 2.13773100  |  |
| H  | -2.54132500 | -3.01828000 | 0.32508700  |  |
| H  | 0.67114700  | -4.51481100 | 0.06372100  |  |
| H  | 3.56495300  | -2.94308600 | 2.76871700  |  |
| H  | -3.19233100 | -2.11006000 | -2.13752800 |  |
| H  | -5.06438000 | -0.17581700 | -1.84266300 |  |
| H  | -5.56406200 | 0.10319200  | 0.79851200  |  |
| C  | 0.27531300  | -2.70558100 | -1.64859200 |  |
| H  | -0.62139600 | -2.09231200 | -1.44609000 |  |
| H  | 0.74396000  | -2.32428900 | -2.56803000 |  |
| H  | -0.04037900 | -3.74701300 | -1.81874100 |  |
| C  | 4.13973000  | -0.64343800 | 1.87405100  |  |
| H  | 4.89683900  | -0.38933300 | 1.11435800  |  |
| H  | 3.66221600  | 0.29899000  | 2.19355100  |  |
| H  | 4.64664000  | -1.09358800 | 2.74209300  |  |
| C  | 3.34959800  | 3.09956400  | -1.78893800 |  |
| H  | 3.81695000  | 4.09652300  | -1.76065200 |  |
| H  | 4.13463700  | 2.33075600  | -1.78161100 |  |
| H  | 2.79626300  | 2.99480500  | -2.73586900 |  |
| C  | 0.41306000  | 3.83674700  | 2.07769300  |  |
| H  | 0.68868800  | 4.89580500  | 2.20299700  |  |
| H  | -0.65845300 | 3.76920300  | 1.83263500  |  |
| H  | 0.57055900  | 3.32006000  | 3.03556700  |  |

VI.4.16 TS3<sup>M</sup> – P/Si

|    |             |             |             |  |
|----|-------------|-------------|-------------|--|
| 0  | 1           |             |             |  |
| Fe | -1.89712100 | 1.67058900  | 0.04184200  |  |
| P  | -0.46266300 | 0.86951300  | -1.53039300 |  |
| P  | -2.45694100 | -0.06866400 | -1.47388200 |  |
| P  | -2.77913000 | -0.28987900 | 0.71001900  |  |
| P  | -0.83995800 | 0.22364300  | 1.53870000  |  |
| P  | 0.31308700  | -0.63021000 | -0.13836300 |  |
| Ga | 2.55571800  | -0.19897200 | 0.29325000  |  |
| Cl | 3.22947800  | -1.18246800 | 2.13131400  |  |
| Si | -1.13737000 | -2.43738100 | -1.12231300 |  |
| N  | -0.93148000 | -3.40271800 | 0.49824000  |  |
| C  | -2.19467900 | -3.80138100 | 0.53006900  |  |
| N  | -2.86478900 | -3.19600600 | -0.41568400 |  |
| C  | 0.10413500  | -3.67711200 | 1.44872700  |  |
| H  | -0.18742500 | -4.50238700 | 2.11904500  |  |
| H  | 0.32698900  | -2.79145100 | 2.06920000  |  |
| H  | 1.03658200  | -3.96794000 | 0.94086100  |  |
| H  | -2.59876100 | -4.55755400 | 1.22514300  |  |
| C  | -4.21660800 | -3.43003100 | -0.81567200 |  |
| H  | -4.71045700 | -4.16432100 | -0.15672400 |  |
| H  | -4.79181600 | -2.49013800 | -0.77843600 |  |
| H  | -4.26585300 | -3.81128000 | -1.84885700 |  |
| C  | -2.54261200 | 3.35270800  | -0.95962200 |  |
| H  | -2.60328900 | 3.43941900  | -2.04356400 |  |
| C  | -3.56680300 | 2.86572800  | -0.10006900 |  |
| H  | -4.54794300 | 2.51090100  | -0.41261400 |  |

|   |             |             |             |
|---|-------------|-------------|-------------|
| C | -3.07616400 | 2.89500600  | 1.23669300  |
| H | -3.61794700 | 2.57364900  | 2.12477300  |
| C | -1.73937800 | 3.38306900  | 1.20096000  |
| H | -1.07951500 | 3.49625500  | 2.05947200  |
| C | -1.41094600 | 3.67035700  | -0.15283400 |
| H | -0.45547900 | 4.04772400  | -0.51322100 |
| N | 2.90125000  | 1.71104300  | 0.28482000  |
| C | 3.79516700  | 2.24056600  | -0.52330400 |
| C | 4.59060900  | 1.56623600  | -1.45651500 |
| C | 4.52558700  | 0.19850900  | -1.73474400 |
| N | 3.74614500  | -0.69290100 | -1.15527200 |
| C | 2.08340900  | 2.54971900  | 1.13611700  |
| H | 2.21831000  | 2.27351700  | 2.19418600  |
| H | 1.01666300  | 2.40956300  | 0.88712200  |
| H | 2.34237500  | 3.61334300  | 1.01216700  |
| H | 3.91800000  | 3.33266200  | -0.46302900 |
| H | 5.29253500  | 2.16200700  | -2.03846400 |
| H | 5.18778200  | -0.17866600 | -2.52867100 |
| C | 3.77235700  | -2.07746300 | -1.57320600 |
| H | 4.49129200  | -2.23404200 | -2.39279600 |
| H | 4.05529400  | -2.72665700 | -0.72843700 |
| H | 2.77433100  | -2.39390800 | -1.92129900 |

VI.4.17 TS4<sup>M</sup> – P/Si

|    |             |             |             |
|----|-------------|-------------|-------------|
| 0  | 1           |             |             |
| Fe | -0.90200100 | 1.88746900  | 0.13793500  |
| P  | -0.08274700 | 0.69743900  | -1.67405100 |
| P  | -2.21725700 | 0.94738100  | -1.41429300 |
| P  | -2.52507700 | 0.37731600  | 0.90727300  |
| P  | -0.40154000 | 0.01471000  | 1.30920300  |
| P  | 0.10947900  | -1.18406800 | -0.52055500 |
| Ga | 2.42328900  | -1.12811000 | -0.14216000 |
| Cl | 3.38310100  | -3.10101100 | -0.18092000 |
| Si | -2.66120300 | -1.35920200 | -0.73898900 |
| N  | -2.86518300 | -2.71249100 | 0.54005300  |
| C  | -4.18333600 | -2.64351000 | 0.46614400  |
| N  | -4.50188300 | -1.65525800 | -0.34714100 |
| C  | -2.03000700 | -3.52635600 | 1.36538200  |
| H  | -1.24451000 | -4.00608800 | 0.76122200  |
| H  | -2.61906500 | -4.31316500 | 1.86346200  |
| H  | -1.53426100 | -2.91381800 | 2.13825600  |
| H  | -4.89156300 | -3.32233900 | 0.96621800  |
| C  | -5.80235600 | -1.24062300 | -0.77332600 |
| H  | -6.58474200 | -1.85995800 | -0.30577800 |
| H  | -5.98356000 | -0.18941800 | -0.49616200 |
| H  | -5.90680300 | -1.32341800 | -1.86708300 |
| C  | 0.03113600  | 3.63165800  | -0.45671700 |
| H  | 0.64736800  | 3.72395100  | -1.34968900 |
| C  | -1.37122300 | 3.86873900  | -0.38256700 |
| H  | -2.01290000 | 4.19090800  | -1.20112800 |
| C  | -1.78719900 | 3.58574800  | 0.94687300  |
| H  | -2.80829500 | 3.63930400  | 1.32202600  |
| C  | -0.64351100 | 3.18883500  | 1.69734400  |
| H  | -0.63941200 | 2.89673800  | 2.74663700  |
| C  | 0.48810800  | 3.21910100  | 0.82621600  |
| H  | 1.51316300  | 2.95104800  | 1.07640500  |
| N  | 3.00425600  | -0.24316300 | 1.49572800  |
| C  | 3.61499700  | 0.92234900  | 1.45818700  |
| C  | 3.98620200  | 1.64488400  | 0.31950300  |
| C  | 3.86229300  | 1.19058000  | -0.99856600 |
| N  | 3.31788500  | 0.06205600  | -1.39899400 |
| C  | 2.78012200  | -0.90892300 | 2.76168700  |
| H  | 3.24151500  | -1.90931400 | 2.74572300  |
| H  | 1.69892400  | -1.02670700 | 2.94350800  |
| H  | 3.21396800  | -0.33231600 | 3.59402000  |
| H  | 3.87373500  | 1.36562200  | 2.43204300  |
| H  | 4.47582400  | 2.60572700  | 0.47350400  |
| H  | 4.27969000  | 1.83571000  | -1.78656700 |
| C  | 3.30840900  | -0.29106900 | -2.80192900 |
| H  | 3.87701700  | 0.43889300  | -3.39952600 |
| H  | 3.75501200  | -1.28802100 | -2.94350300 |
| H  | 2.27286500  | -0.31822200 | -3.18200500 |

VI.4.18 TS5<sup>M</sup> – P/Si

|    |            |             |             |
|----|------------|-------------|-------------|
| 0  | 1          |             |             |
| Fe | 2.36758900 | -0.53030000 | 0.03282400  |
| P  | 1.13699600 | -0.77409300 | -1.89995400 |

|    |             |             |             |
|----|-------------|-------------|-------------|
| P  | 2.80595300  | 0.61340800  | -1.93028600 |
| P  | 2.44410600  | 1.76501700  | -0.13700800 |
| P  | 0.63185800  | 0.75106300  | 0.72330400  |
| P  | -0.50930400 | 0.51497600  | -1.18680200 |
| Ga | -2.06456900 | -0.96408700 | -0.25513600 |
| Cl | -4.06764700 | -0.72679200 | -1.11897800 |
| Si | 0.04982700  | 2.90210900  | -0.88255400 |
| N  | -1.79545500 | 3.09744300  | -0.25363500 |
| C  | -1.39298800 | 3.83943400  | 0.76380000  |
| N  | -0.08376600 | 3.80465000  | 0.83956300  |
| C  | -3.11315800 | 3.07937400  | -0.82509400 |
| H  | -3.86237500 | 3.40639500  | -0.08477600 |
| H  | -3.37690400 | 2.06002700  | -1.14657800 |
| H  | -3.19146100 | 3.74271200  | -1.70322900 |
| H  | -2.05641000 | 4.43692700  | 1.41317600  |
| C  | 0.76215200  | 4.30741400  | 1.87500000  |
| H  | 1.60763900  | 4.86514500  | 1.44511100  |
| H  | 0.20964300  | 4.98048300  | 2.55215200  |
| H  | 1.18049900  | 3.47642300  | 2.46947400  |
| C  | 2.53694400  | -2.55891500 | 0.42001100  |
| H  | 1.92417400  | -3.33638500 | -0.03276800 |
| C  | 3.75792200  | -2.04676700 | -0.10388600 |
| H  | 4.24206700  | -2.36134800 | -1.02711000 |
| C  | 4.21301100  | -1.01731800 | 0.77085500  |
| H  | 5.11031100  | -0.41502400 | 0.63572600  |
| C  | 3.28001800  | -0.90289200 | 1.84107800  |
| H  | 3.33742400  | -0.19580700 | 2.66749000  |
| C  | 2.23941600  | -1.85269300 | 1.61783900  |
| H  | 1.35778100  | -2.00564800 | 2.23883900  |
| N  | -2.22453500 | -0.80471600 | 1.67309500  |
| C  | -1.82861900 | -1.77425600 | 2.47068400  |
| C  | -1.33091300 | -3.02455400 | 2.08994900  |
| C  | -1.22204700 | -3.48425400 | 0.77317000  |
| N  | -1.50549300 | -2.82068800 | -0.32872300 |
| C  | -2.74678600 | 0.42886800  | 2.21620200  |
| H  | -3.75226900 | 0.62362200  | 1.80996200  |
| H  | -2.09149900 | 1.27072100  | 1.93420700  |
| H  | -2.80955300 | 0.38501300  | 3.31480900  |
| H  | -1.90908800 | -1.57908300 | 3.55058600  |
| H  | -1.04907600 | -3.71456700 | 2.88425500  |
| H  | -0.87196300 | -4.51873900 | 0.63796600  |
| C  | -1.38887800 | -3.46387700 | -1.62176600 |
| H  | -1.08680300 | -4.51723800 | -1.51221400 |
| H  | -2.35449000 | -3.42783700 | -2.15094500 |
| H  | -0.63673900 | -2.94512300 | -2.23989100 |

VI.4.19 TS6<sup>M</sup> – P/Si

|     |             |             |             |
|-----|-------------|-------------|-------------|
| 0 1 |             |             |             |
| Ga  | 2.64050100  | -0.37523000 | 0.02549200  |
| Fe  | -1.24967100 | 1.63992000  | 0.24445300  |
| Cl  | 2.43569400  | 0.70599900  | 1.94496700  |
| P   | -0.64614600 | -0.55744300 | 0.15739800  |
| P   | -2.43527200 | 0.16859300  | -0.94348800 |
| P   | -1.62295500 | 1.80063900  | -2.10627200 |
| P   | 0.40013900  | 1.74289900  | -1.34994500 |
| P   | 0.83937700  | -0.43771700 | -1.46380600 |
| Si  | -2.78932600 | -2.17727300 | -0.85988400 |
| N   | 4.29546100  | 0.26304100  | -0.78772300 |
| N   | 3.26163000  | -2.17323800 | 0.46803200  |
| N   | -4.75071100 | -2.01889300 | -0.67458800 |
| N   | -3.36167500 | -2.19921200 | 0.95778600  |
| C   | -0.30859200 | 2.94344400  | 1.53521600  |
| C   | -1.34733800 | 3.61340400  | 0.82752000  |
| C   | -2.57368300 | 2.94702500  | 1.10773700  |
| C   | -2.29591000 | 1.87686100  | 2.01045100  |
| C   | -0.89768900 | 1.87081800  | 2.26553500  |
| C   | -4.64206700 | -2.19838800 | 0.61734900  |
| C   | 5.34900700  | -0.51590700 | -0.90946100 |
| C   | 5.46471600  | -1.84988900 | -0.50362400 |
| H   | 6.41334400  | -2.35016400 | -0.69418700 |
| C   | 4.47145600  | -2.58379300 | 0.15277800  |
| H   | 6.23609800  | -0.06345600 | -1.37906500 |
| H   | 4.72660200  | -3.61538800 | 0.44096700  |
| H   | -5.47961700 | -2.35848900 | 1.31929700  |
| H   | -0.34564300 | 1.15671100  | 2.87372100  |
| H   | -3.02166700 | 1.16219100  | 2.39600400  |
| H   | -3.54790100 | 3.19969900  | 0.69164800  |
| H   | -1.22046100 | 4.45696200  | 0.15052300  |

|   |             |             |             |
|---|-------------|-------------|-------------|
| H | 0.75422200  | 3.17498200  | 1.51279400  |
| C | -2.81067000 | -2.48039400 | 2.25088500  |
| H | -1.91398700 | -1.86179200 | 2.40730500  |
| H | -3.54046400 | -2.24654600 | 3.04293600  |
| H | -2.51308300 | -3.53814700 | 2.35660600  |
| C | -5.94792700 | -1.91595800 | -1.44776800 |
| H | -6.84356800 | -2.06194400 | -0.82074100 |
| H | -6.02175200 | -0.92377300 | -1.92404500 |
| H | -5.96583500 | -2.67248000 | -2.24861800 |
| C | 4.35560900  | 1.64772800  | -1.20268500 |
| H | 3.52090100  | 1.88457300  | -1.88253500 |
| H | 4.26017300  | 2.31209300  | -0.32793100 |
| H | 5.30540600  | 1.87063300  | -1.71457000 |
| C | 2.35441200  | -3.04009400 | 1.18538500  |
| H | 2.10611700  | -2.60391300 | 2.16712200  |
| H | 1.40909100  | -3.15498000 | 0.62892400  |
| H | 2.79366000  | -4.03829300 | 1.34300700  |

VI.4.20 TS7<sup>M</sup> – P/Si

|     |             |             |             |
|-----|-------------|-------------|-------------|
| 0 1 |             |             |             |
| Ga  | -1.84542400 | 1.38429500  | -0.13235700 |
| Fe  | 0.44856200  | -2.10708100 | 0.12490500  |
| Cl  | -2.24337100 | 3.54777700  | -0.08444900 |
| P   | 1.23580600  | 0.03826300  | 0.31448300  |
| P   | 2.59382700  | -1.42525200 | -0.56794400 |
| P   | 1.29814600  | -2.26570900 | -2.05538300 |
| P   | -0.57441700 | -1.23169500 | -1.74639000 |
| P   | 0.06599000  | 0.87794300  | -1.40135000 |
| Si  | 2.04051600  | 2.23057700  | 0.50797800  |
| N   | -2.08220700 | 0.77190100  | 1.70671100  |
| N   | -3.42175600 | 0.50152900  | -0.88135900 |
| N   | 3.32714600  | 2.00878300  | -0.86634600 |
| N   | 3.79623300  | 1.86980500  | 1.22673600  |
| C   | -1.24755600 | -2.88106300 | 0.99904300  |
| C   | -0.56696400 | -3.87700300 | 0.23503100  |
| C   | 0.74481900  | -4.02660600 | 0.77141300  |
| C   | 0.87861000  | -3.13467000 | 1.87314000  |
| C   | -0.34930300 | -2.42636100 | 2.00373500  |
| C   | 4.30319300  | 1.88221000  | 0.00905900  |
| C   | -3.08618100 | -0.00990700 | 2.04825800  |
| C   | -4.07244200 | -0.53930900 | 1.21245000  |
| H   | -4.82283900 | -1.18359300 | 1.66885800  |
| C   | -4.20335100 | -0.26301100 | -0.15456300 |
| H   | -3.15587900 | -0.26877200 | 3.11612600  |
| H   | -5.05609500 | -0.72542200 | -0.67486300 |
| H   | 5.37722400  | 1.82688300  | -0.23839800 |
| H   | -0.55270000 | -1.63598300 | 2.72434900  |
| H   | 1.77031800  | -2.99664100 | 2.48204300  |
| H   | 1.51918400  | -4.68639700 | 0.38278000  |
| H   | -0.96662600 | -4.40800700 | -0.62770800 |
| H   | -2.26103200 | -2.51793400 | 0.83765800  |
| C   | 4.51560500  | 1.89345200  | 2.46385100  |
| H   | 4.18361300  | 1.07456400  | 3.12207500  |
| H   | 5.59720200  | 1.77056600  | 2.29078500  |
| H   | 4.36349600  | 2.84293200  | 3.00386100  |
| C   | 3.39656200  | 1.88597600  | -2.29205800 |
| H   | 4.44196400  | 1.95564000  | -2.63438000 |
| H   | 2.98174500  | 0.91711900  | -2.61822100 |
| H   | 2.81093500  | 2.68165400  | -2.77432300 |
| C   | -1.19979500 | 1.29610200  | 2.72536700  |
| H   | -0.17117600 | 0.92799200  | 2.56965800  |
| H   | -1.17605900 | 2.39654600  | 2.67526400  |
| H   | -1.53214300 | 0.99647300  | 3.73242100  |
| C   | -3.70372700 | 0.71353100  | -2.28375600 |
| H   | -3.79603400 | 1.79149800  | -2.49210700 |
| H   | -2.88329600 | 0.30957200  | -2.90099900 |
| H   | -4.63918800 | 0.21454200  | -2.58264000 |

VI.4.21 TS8<sup>M</sup> – P/Si

|     |             |             |             |
|-----|-------------|-------------|-------------|
| 0 1 |             |             |             |
| Ga  | 2.27155400  | -0.07956400 | 0.16388400  |
| Fe  | -1.86948700 | -1.57263500 | 0.15294700  |
| Cl  | 1.78280800  | -0.88866600 | 2.14921900  |
| P   | 0.53928300  | 0.71094100  | -1.19193400 |
| P   | -1.50373900 | 0.54225800  | 0.92453000  |
| P   | -0.50698100 | -1.16309900 | -1.61879900 |
| Si  | -0.45901200 | 2.37239300  | 0.10853000  |

|   |             |             |             |
|---|-------------|-------------|-------------|
| P | -2.58376600 | -0.81784100 | -1.95149200 |
| P | -3.31185000 | 0.23362000  | -0.15134500 |
| N | 3.35224500  | -1.41691900 | -0.76004900 |
| N | -1.60095700 | 3.69299300  | 0.92122200  |
| N | 3.67755800  | 1.25049900  | 0.41337500  |
| N | -1.59071200 | 3.16731200  | -1.15694800 |
| C | -2.85807400 | -2.46420200 | 1.73974900  |
| C | 4.57876700  | -1.14410500 | -1.15465800 |
| C | 4.85478300  | 1.11257600  | -0.15845700 |
| C | -3.14722800 | -3.12687700 | 0.50927200  |
| C | -1.92299000 | -3.61358800 | -0.02876700 |
| C | 5.29382100  | 0.03759400  | -0.93821900 |
| H | 6.29997600  | 0.09652500  | -1.35130500 |
| C | -2.14805900 | 3.94538700  | -0.25026200 |
| C | -0.87244600 | -3.23083700 | 0.85730200  |
| C | -1.45362300 | -2.52519400 | 1.94689600  |
| H | -2.93234100 | 4.69293000  | -0.44937100 |
| H | 5.57493400  | 1.92798600  | 0.01012600  |
| H | 5.10104700  | -1.94463200 | -1.70066500 |
| H | -3.58148000 | -1.96627600 | 2.38326300  |
| H | -4.12940600 | -3.22244100 | 0.04842900  |
| H | -1.80804400 | -4.14296200 | -0.97348600 |
| H | 0.19054600  | -3.42160300 | 0.72788200  |
| H | -0.89599600 | -2.06315600 | 2.75956600  |
| C | 2.80240300  | -2.73937300 | -0.96803700 |
| H | 2.62651800  | -3.23321500 | 0.00204800  |
| H | 1.83501100  | -2.67721300 | -1.49444400 |
| H | 3.48837600  | -3.36571600 | -1.56025200 |
| C | 3.41611600  | 2.38078800  | 1.27856600  |
| H | 2.51476600  | 2.91889000  | 0.94103300  |
| H | 3.22597300  | 2.03377600  | 2.30759600  |
| H | 4.26967600  | 3.07740200  | 1.29137500  |
| C | -1.84792100 | 3.09135800  | -2.56346200 |
| H | -2.20150400 | 2.08170600  | -2.82904900 |
| H | -2.61933400 | 3.82125400  | -2.85609300 |
| H | -0.93318700 | 3.29469000  | -3.14189700 |
| C | -1.99159800 | 4.13493400  | 2.22082400  |
| H | -2.88812800 | 4.77345800  | 2.17041400  |
| H | -2.22820800 | 3.26479200  | 2.85781800  |
| H | -1.18711400 | 4.70647900  | 2.71175800  |

VI.4.22 TS9<sup>M</sup> – P/Si

|     |             |             |             |
|-----|-------------|-------------|-------------|
| 0 1 |             |             |             |
| Ga  | 2.63647400  | -0.01722400 | -0.13363200 |
| Fe  | -3.04049900 | -0.29241200 | 0.05849300  |
| Cl  | 2.84575100  | 2.06631000  | -0.89896800 |
| P   | 0.66572900  | -1.18617600 | -0.64826100 |
| P   | -1.92870100 | -0.73402400 | -1.82655100 |
| P   | -0.20817700 | -1.10036100 | 1.37859500  |
| Si  | -0.84769100 | 0.51512000  | -0.10588200 |
| P   | -2.17937200 | -2.12290200 | 1.22377800  |
| P   | -2.69738100 | -2.46093400 | -0.84663500 |
| N   | 3.43674100  | 0.00084600  | 1.64381600  |
| N   | -0.32647300 | 2.06861800  | 0.84027300  |
| N   | 4.06515200  | -1.01831200 | -1.02395000 |
| N   | -0.51905400 | 2.00002700  | -1.29007900 |
| C   | -4.24764900 | 1.22117400  | -0.65366300 |
| C   | 4.56975900  | -0.62375100 | 1.89740900  |
| C   | 5.10036800  | -1.49092100 | -0.36562100 |
| C   | -5.00492300 | 0.05172800  | -0.36353100 |
| C   | -4.83429200 | -0.26238900 | 1.01547300  |
| C   | 5.36108000  | -1.34521100 | 1.00107000  |
| H   | 6.26641200  | -1.80751200 | 1.39215300  |
| C   | -0.20641900 | 2.76885100  | -0.27638200 |
| C   | -3.96571900 | 0.71285700  | 1.58833300  |
| C   | -3.59953500 | 1.62230800  | 0.55306800  |
| H   | 0.10500600  | 3.82063900  | -0.34376100 |
| H   | 5.83939700  | -2.05494900 | -0.95528800 |
| H   | 4.93266000  | -0.56032500 | 2.93456400  |
| H   | -4.15929300 | 1.71032300  | -1.62198500 |
| H   | -5.57853100 | -0.53210300 | -1.08198300 |
| H   | -5.26462000 | -1.11830400 | 1.53300300  |
| H   | -3.62762100 | 0.74502700  | 2.62265400  |
| H   | -2.95972200 | 2.49583000  | 0.66781600  |
| C   | 2.77925100  | 0.75115600  | 2.69000800  |
| H   | 2.67143200  | 1.80549500  | 2.38753900  |
| H   | 1.77184800  | 0.34349400  | 2.87604700  |
| H   | 3.35448700  | 0.71366300  | 3.62870300  |

|   |             |             |             |
|---|-------------|-------------|-------------|
| C | 3.95560800  | -1.21369800 | -2.45246800 |
| H | 3.00620300  | -1.71786700 | -2.69803300 |
| H | 3.96343600  | -0.24081900 | -2.97118400 |
| H | 4.78706000  | -1.82461400 | -2.83861400 |
| C | -0.25226900 | 2.24668500  | -2.67708800 |
| H | 0.76177500  | 1.90767100  | -2.94727700 |
| H | -0.98275900 | 1.70408000  | -3.29263000 |
| H | -0.32687600 | 3.32232900  | -2.90493100 |
| C | -0.33916800 | 2.53687400  | 2.19183500  |
| H | -1.25953300 | 3.09425500  | 2.44220500  |
| H | -0.28881400 | 1.66183200  | 2.85631200  |
| H | 0.52763800  | 3.18329900  | 2.40629600  |

VI.4.23 TS10<sup>M</sup> – P/Si

|    |             |             |             |
|----|-------------|-------------|-------------|
| 0  | 1           |             |             |
| Ga | 2.64050100  | -0.37523000 | 0.02549200  |
| Fe | -1.24967100 | 1.63992000  | 0.24445300  |
| Cl | 2.43569400  | 0.70599900  | 1.94496700  |
| P  | -0.64614600 | -0.55744300 | 0.15739800  |
| P  | -2.43527200 | 0.16859300  | -0.94348800 |
| P  | -1.62295500 | 1.80063900  | -2.10627200 |
| P  | 0.40013900  | 1.74289900  | -1.34994500 |
| P  | 0.83937700  | -0.43771700 | -1.46380600 |
| Si | -2.78932600 | -2.17727300 | -0.85988400 |
| N  | 4.29546100  | 0.26304100  | -0.78772300 |
| N  | 3.26163000  | -2.17323800 | 0.46803200  |
| N  | -4.75071100 | -2.01889300 | -0.67458800 |
| N  | -3.36167500 | -2.19921200 | 0.95778600  |
| C  | -0.30859200 | 2.94344400  | 1.53521600  |
| C  | -1.34733800 | 3.61340400  | 0.82752000  |
| C  | -2.57368300 | 2.94702500  | 1.10773700  |
| C  | -2.29591000 | 1.87686100  | 2.01045100  |
| C  | -0.89768900 | 1.87081800  | 2.26553500  |
| C  | -4.64206700 | -2.19838800 | 0.61734900  |
| C  | 5.34900700  | -0.51590700 | -0.90946100 |
| C  | 5.46471600  | -1.84988900 | -0.50362400 |
| H  | 6.41334400  | -2.35016400 | -0.69418700 |
| C  | 4.47145600  | -2.58379300 | 0.15277800  |
| H  | 6.23609800  | -0.06345600 | -1.37906500 |
| H  | 4.72660200  | -3.61538800 | 0.44096700  |
| H  | -5.47961700 | -2.35848900 | 1.31929700  |
| H  | -0.34564300 | 1.15671100  | 2.87372100  |
| H  | -3.02166700 | 1.16219100  | 2.39600400  |
| H  | -3.54790100 | 3.19969900  | 0.69164800  |
| H  | -1.22046100 | 4.45696200  | 0.15052300  |
| H  | 0.75422200  | 3.17498200  | 1.51279400  |
| C  | -2.81067000 | -2.48039400 | 2.25088500  |
| H  | -1.91398700 | -1.86179200 | 2.40730500  |
| H  | -3.54046400 | -2.24654600 | 3.04293600  |
| H  | -2.51308300 | -3.53814700 | 2.35660600  |
| C  | -5.94792700 | -1.91595800 | -1.44776800 |
| H  | -6.84356800 | -2.06194400 | -0.82074100 |
| H  | -6.02175200 | -0.92377300 | -1.92404500 |
| H  | -5.96583500 | -2.67248000 | -2.24861800 |
| C  | 4.35560900  | 1.64772800  | -1.20268500 |
| H  | 3.52090100  | 1.88457300  | -1.88253500 |
| H  | 4.26017300  | 2.31209300  | -0.32793100 |
| H  | 5.30540600  | 1.87063300  | -1.71457000 |
| C  | 2.35441200  | -3.04009400 | 1.18538500  |
| H  | 2.10611700  | -2.60391300 | 2.16712200  |
| H  | 1.40909100  | -3.15498000 | 0.62892400  |
| H  | 2.79366000  | -4.03829300 | 1.34300700  |

VI.4.24 Int1<sup>M</sup> – As/Si

|    |             |             |             |
|----|-------------|-------------|-------------|
| 0  | 1           |             |             |
| Ga | -2.92866700 | 0.41658900  | 0.09728800  |
| Fe | 2.73243500  | 0.67848300  | 0.01894400  |
| Cl | -4.88752600 | -0.62052200 | 0.29886200  |
| As | 0.22151400  | -1.05121800 | -1.89279500 |
| Si | -1.08129700 | -1.10754700 | 0.07996700  |
| As | 0.71903400  | 1.19836400  | -1.04055000 |
| As | 2.44719500  | -1.54388700 | -0.99135100 |
| As | 2.22309300  | -1.20041900 | 1.34345100  |
| As | 0.55625400  | 0.57753500  | 1.34008500  |
| N  | -1.20602200 | -2.30074700 | 1.49812300  |
| N  | -3.02936100 | 1.60912200  | -1.44366100 |
| N  | -2.89704600 | 1.80610600  | 1.46714400  |

|   |             |             |             |
|---|-------------|-------------|-------------|
| N | -2.13798400 | -2.75723400 | -0.38312000 |
| C | 3.79099700  | 1.96467200  | 1.25942700  |
| C | 3.95291300  | 1.93899900  | -1.03877400 |
| C | 4.63134400  | 0.87788800  | 0.89015200  |
| C | 3.37614500  | 2.62818600  | 0.07171800  |
| C | -2.94284000 | 2.91588800  | -1.31506900 |
| C | -2.83794200 | 3.08475900  | 1.15842400  |
| C | -2.83482100 | 3.64017500  | -0.12382100 |
| H | -2.76948800 | 4.72460000  | -0.20083100 |
| C | -1.98662500 | -3.16186200 | 0.83976700  |
| C | 4.72151700  | 0.85482500  | -0.53042400 |
| H | -2.44401300 | -4.05343300 | 1.29751700  |
| H | 2.72498600  | 3.49992500  | 0.01960200  |
| H | 3.82186300  | 2.18788500  | -2.09043300 |
| H | -2.96408300 | 3.49869000  | -2.24845800 |
| H | -2.79270200 | 3.78788400  | 2.00410300  |
| H | 5.26890100  | 0.12617700  | -1.12563600 |
| H | 5.10925500  | 0.17841600  | 1.57377600  |
| H | 3.49622500  | 2.22619900  | 2.27475400  |
| C | -3.15203200 | 1.01254800  | -2.75454300 |
| H | -2.28120400 | 0.36937800  | -2.97116400 |
| H | -4.05688600 | 0.38519900  | -2.80443300 |
| H | -3.21541200 | 1.78189500  | -3.54039200 |
| C | -2.93603200 | 1.38924100  | 2.84930100  |
| H | -3.85125700 | 0.80750600  | 3.04624000  |
| H | -2.06800100 | 0.74821900  | 3.08077400  |
| H | -2.91368000 | 2.25462800  | 3.53066300  |
| C | -3.01881000 | -3.28103100 | -1.38056900 |
| H | -3.26488700 | -4.33835400 | -1.18703000 |
| H | -3.95940800 | -2.70489900 | -1.40684800 |
| H | -2.53899200 | -3.21391000 | -2.36913700 |
| C | -0.76513300 | -2.41689100 | 2.85764500  |
| H | -1.55108300 | -2.86870900 | 3.48464100  |
| H | 0.15506100  | -3.01781100 | 2.95213100  |
| H | -0.54688400 | -1.41723200 | 3.26094100  |

VI.4.25 Int2<sup>M</sup> – As/Si

|     |             |             |             |
|-----|-------------|-------------|-------------|
| 0 1 |             |             |             |
| Ga  | -2.61069200 | -0.34084100 | -0.04852900 |
| Fe  | 1.72330900  | -1.36235200 | 0.34402200  |
| Cl  | -4.29849500 | 1.04156400  | 0.27454000  |
| As  | -0.58158500 | 0.90931600  | -0.48871600 |
| Si  | -1.16835700 | 3.23391700  | -1.07366500 |
| As  | 0.62469600  | -0.73618600 | -1.75170200 |
| As  | 0.66086900  | 0.54515900  | 1.52862400  |
| As  | 2.90545500  | 0.73251300  | 0.79407400  |
| As  | 2.87085200  | -0.06758100 | -1.42213700 |
| N   | 0.54454900  | 3.80858200  | -0.46545700 |
| N   | -2.60695700 | -1.64229200 | 1.39059500  |
| N   | -3.00676200 | -1.56164500 | -1.50778100 |
| N   | -1.17523600 | 3.59036800  | 0.79401700  |
| C   | 3.12101200  | -2.80048000 | 0.75384500  |
| C   | 0.88206500  | -3.24456700 | 0.42148700  |
| C   | 2.42520500  | -2.46182600 | 1.94874900  |
| C   | 2.17212800  | -3.28937200 | -0.18841100 |
| C   | -2.72863400 | -2.93128700 | 1.14258100  |
| C   | -3.04888800 | -2.86313200 | -1.31932000 |
| C   | -2.90182700 | -3.54014700 | -0.10339300 |
| H   | -2.97239500 | -4.62687400 | -0.12315800 |
| C   | 0.09903900  | 3.95195300  | 0.76790400  |
| C   | 1.04227000  | -2.73420000 | 1.73836900  |
| H   | 0.68105300  | 4.33320500  | 1.62158600  |
| H   | 2.39169800  | -3.61959400 | -1.20266500 |
| H   | -0.06061600 | -3.53696000 | -0.03864700 |
| H   | -2.69657100 | -3.59717700 | 2.01800200  |
| H   | -3.22768200 | -3.47937900 | -2.21314900 |
| H   | 0.24339800  | -2.56363700 | 2.45760700  |
| H   | 2.86861400  | -2.04714400 | 2.85246100  |
| H   | 4.19024200  | -2.68526000 | 0.58213600  |
| C   | -2.50351500 | -1.17063800 | 2.75532600  |
| H   | -1.54634300 | -0.64356900 | 2.90871000  |
| H   | -3.31966600 | -0.46327800 | 2.97409800  |
| H   | -2.56316000 | -2.00743700 | 3.46900200  |
| C   | -3.19090900 | -1.00404200 | -2.83064500 |
| H   | -4.00639700 | -0.26367200 | -2.82114500 |
| H   | -2.27018200 | -0.49518700 | -3.16328600 |
| H   | -3.43491400 | -1.78938000 | -3.56289700 |
| C   | -2.01671400 | 3.44624400  | 1.94591600  |

|   |             |            |             |
|---|-------------|------------|-------------|
| H | -1.86585200 | 4.27554100 | 2.65645500  |
| H | -3.06888500 | 3.43765100 | 1.63271000  |
| H | -1.81705400 | 2.49612000 | 2.47272100  |
| C | 1.85665100  | 4.09935500 | -0.96276800 |
| H | 2.50318900  | 4.46653900 | -0.15033500 |
| H | 2.32194900  | 3.19038800 | -1.37535200 |
| H | 1.82050200  | 4.86632500 | -1.75314000 |

VI.4.26 Int3<sup>M</sup> – As/Si

|    |             |             |             |
|----|-------------|-------------|-------------|
| 0  | 1           |             |             |
| Fe | 1.09416400  | -1.68404000 | 0.61919200  |
| As | -0.27929900 | -1.57403100 | -1.36323900 |
| As | 2.06952200  | -1.80708200 | -1.67803400 |
| As | 2.85927300  | -0.28354200 | -0.07633400 |
| As | 0.73127700  | 0.73714700  | 0.76510600  |
| As | -0.55500300 | 0.84794900  | -1.33353900 |
| Ga | -2.61189200 | 0.67890400  | -0.03021900 |
| Cl | -3.69624200 | 2.60829200  | 0.00833900  |
| Si | 2.04669000  | 2.30202900  | -0.80093400 |
| N  | 0.96336900  | 3.74922500  | -0.11031800 |
| C  | 1.95914700  | 4.15638200  | 0.64862400  |
| N  | 2.93395000  | 3.26871400  | 0.61119100  |
| C  | -0.25940700 | 4.44209200  | -0.39281800 |
| H  | -0.27116900 | 5.42736200  | 0.10274900  |
| H  | -1.13751100 | 3.87221200  | -0.04710000 |
| H  | -0.37740100 | 4.60077200  | -1.47610900 |
| H  | 1.99058300  | 5.11663700  | 1.19265500  |
| C  | 4.20459500  | 3.33826700  | 1.26405900  |
| H  | 4.35780000  | 2.46291700  | 1.91650300  |
| H  | 5.02955000  | 3.35546300  | 0.53319600  |
| H  | 4.28055700  | 4.24640200  | 1.88493600  |
| C  | -0.22354500 | -2.96333200 | 1.58036600  |
| H  | -1.27198700 | -3.10620700 | 1.32332400  |
| C  | 0.88435300  | -3.68344400 | 1.04648400  |
| H  | 0.83619500  | -4.47139900 | 0.29626900  |
| C  | 2.07307500  | -3.16484100 | 1.63585500  |
| H  | 3.08788700  | -3.49484100 | 1.41796800  |
| C  | 1.70339000  | -2.13091900 | 2.54446100  |
| H  | 2.38356500  | -1.53279100 | 3.14895000  |
| C  | 0.28575300  | -2.00485100 | 2.49985400  |
| H  | -0.30690700 | -1.28480800 | 3.06130800  |
| N  | -2.72539900 | 0.03528900  | 1.81364300  |
| C  | -3.28790900 | -1.12002400 | 2.10580000  |
| C  | -3.88874500 | -2.01733500 | 1.21924900  |
| C  | -4.10812900 | -1.77461100 | -0.14204100 |
| N  | -3.73729300 | -0.71291300 | -0.82236600 |
| C  | -2.28444600 | 0.90886100  | 2.87996800  |
| H  | -2.84856600 | 1.85504000  | 2.84829200  |
| H  | -1.21518400 | 1.15281200  | 2.76335000  |
| H  | -2.43511700 | 0.43921500  | 3.86526700  |
| H  | -3.29448000 | -1.39999600 | 3.17050600  |
| H  | -4.28102100 | -2.94527000 | 1.63353800  |
| H  | -4.66254100 | -2.54412800 | -0.70046200 |
| C  | -4.06184800 | -0.59594900 | -2.22636300 |
| H  | -4.68650000 | -1.43799800 | -2.56385400 |
| H  | -4.60466900 | 0.34392400  | -2.41500200 |
| H  | -3.14069200 | -0.58417500 | -2.83391000 |

VI.4.27 Int4<sup>M</sup> – As/Si

|    |             |             |             |
|----|-------------|-------------|-------------|
| 0  | 1           |             |             |
| Ga | 3.18358700  | 0.76032500  | -0.00025100 |
| Fe | -1.41652600 | -1.59617700 | 0.00023000  |
| Cl | 4.67157600  | 2.38222800  | -0.00070800 |
| Si | -2.50838800 | 1.18712400  | 0.00009700  |
| N  | -2.63900000 | 3.06676700  | 0.00001400  |
| N  | 3.63921300  | -0.46420900 | 1.45797500  |
| N  | -4.30697400 | 1.70996600  | -0.00006100 |
| N  | 3.63906800  | -0.46488600 | -1.45795500 |
| C  | -0.52012400 | -3.42622900 | 0.00079700  |
| C  | -1.34738700 | -3.29280300 | 1.15293000  |
| C  | -1.34667800 | -3.29321300 | -1.15189900 |
| C  | -2.68668900 | -3.08239300 | 0.70854300  |
| C  | -2.68624500 | -3.08266400 | -0.70841400 |
| C  | -3.95376200 | 2.98226400  | -0.00018500 |
| C  | 3.93251100  | -2.38513000 | 0.00044100  |
| H  | 4.12445900  | -3.45739400 | 0.00068000  |
| C  | 3.86276400  | -1.74223100 | 1.24147800  |



|    |             |             |             |
|----|-------------|-------------|-------------|
| C  | 3.86265600  | -1.74280400 | -1.24088700 |
| H  | 4.02475700  | -2.36757300 | -2.13277300 |
| H  | 4.02492900  | -2.36659000 | 2.13363800  |
| H  | -4.65106200 | 3.83571200  | -0.00041000 |
| H  | -3.55201000 | -2.92211300 | -1.34803400 |
| H  | -1.01409600 | -3.33550100 | -2.18842100 |
| H  | 0.55985500  | -3.57154900 | 0.00115300  |
| H  | -1.01544600 | -3.33471400 | 2.18967300  |
| H  | -3.55285100 | -2.92162200 | 1.34757000  |
| As | 0.85158900  | 1.45194200  | -0.00027700 |
| As | 0.17113600  | -0.43857400 | -1.44675700 |
| As | 0.17135000  | -0.43826700 | 1.44671800  |
| As | -2.12041300 | -0.01630400 | 1.89450100  |
| As | -2.12068000 | -0.01660100 | -1.89418800 |
| C  | -5.61905800 | 1.13936700  | -0.00188500 |
| H  | -5.77024400 | 0.50746200  | 0.88789000  |
| H  | -6.38727700 | 1.92878400  | -0.00119900 |
| H  | -5.76908300 | 0.51008100  | -0.89373700 |
| C  | -1.80755700 | 4.23301400  | 0.00136300  |
| H  | -1.15495300 | 4.24321000  | -0.88506400 |
| H  | -2.42136000 | 5.14776700  | 0.00113400  |
| H  | -1.15672500 | 4.24250100  | 0.88911400  |
| C  | 3.64670200  | 0.06151200  | -2.80334300 |
| H  | 3.90583400  | -0.71836300 | -3.53711000 |
| H  | 2.65236000  | 0.46371200  | -3.06397500 |
| H  | 4.37729000  | 0.88232000  | -2.88415600 |
| C  | 3.64688700  | 0.06279200  | 2.80312600  |
| H  | 2.65249700  | 0.46492600  | 3.06368100  |
| H  | 3.90623900  | -0.71670600 | 3.53721600  |
| H  | 4.37733600  | 0.88376700  | 2.88349500  |

VI.4.28 Int5<sup>M</sup> – As/Si

|    |             |             |             |
|----|-------------|-------------|-------------|
| 0  |             |             |             |
| 1  |             |             |             |
| Ga | -3.18104400 | 0.28742400  | 0.14344200  |
| Fe | 1.22708800  | -0.58311100 | 0.86548000  |
| Cl | -2.64431400 | 0.29511700  | 2.29781100  |
| As | 0.15207300  | 1.29884200  | -0.14820900 |
| As | 2.03693700  | 0.36163000  | -1.25209700 |
| As | 1.77347800  | -1.97592800 | -1.05286000 |
| As | -0.47206300 | -1.87743000 | -0.27362300 |
| As | -1.42420500 | 0.02292400  | -1.50978000 |
| Si | 4.26129300  | 1.36200500  | -1.47960300 |
| N  | -4.65959700 | -0.98084000 | -0.03436100 |
| N  | -4.23502900 | 1.91356300  | -0.13488300 |
| N  | 5.12425200  | 0.35084300  | -0.11272900 |
| N  | 4.19270100  | 2.25775300  | 0.20424800  |
| C  | 0.56861600  | -1.24751400 | 2.71362800  |
| C  | 1.77680000  | -1.90937700 | 2.35558800  |
| C  | 2.78429600  | -0.91879800 | 2.17177700  |
| C  | 2.20130300  | 0.35485100  | 2.43445400  |
| C  | 0.83066800  | 0.14883800  | 2.76170800  |
| C  | 4.92141200  | 1.31278100  | 0.76665400  |
| C  | -5.88590100 | -0.58371100 | -0.29931700 |
| C  | -6.32623700 | 0.73016600  | -0.49034600 |
| H  | -7.38242000 | 0.87685400  | -0.71270000 |
| C  | -5.52574800 | 1.87219700  | -0.38647400 |
| H  | -6.64736400 | -1.37549300 | -0.37406000 |
| H  | -6.02695600 | 2.84271100  | -0.52585900 |
| H  | 5.31422100  | 1.33368300  | 1.79767300  |
| H  | 0.09178700  | 0.91236800  | 2.99621300  |
| H  | 2.69820200  | 1.32092900  | 2.38729100  |
| H  | 3.81570700  | -1.11568700 | 1.88943500  |
| H  | 1.90514500  | -2.98245600 | 2.22262000  |
| H  | -0.39974900 | -1.70739500 | 2.89922500  |
| C  | 3.67320100  | 3.44920900  | 0.80356300  |
| H  | 2.57007500  | 3.42736800  | 0.81618700  |
| H  | 4.02907700  | 3.54984900  | 1.84187000  |
| H  | 3.98971300  | 4.34443800  | 0.24546600  |
| C  | 5.86123500  | -0.86388600 | 0.05787800  |
| H  | 6.28664200  | -0.92328200 | 1.07286900  |
| H  | 5.20499500  | -1.73732300 | -0.09302800 |
| H  | 6.69056700  | -0.93205700 | -0.66412200 |
| C  | -4.37856200 | -2.38217300 | 0.18801600  |
| H  | -3.60192800 | -2.73894900 | -0.50840000 |
| H  | -3.99525700 | -2.53611500 | 1.21005800  |
| H  | -5.28270400 | -2.99740600 | 0.05367000  |
| C  | -3.55353900 | 3.18167500  | -0.00837200 |
| H  | -3.15423200 | 3.30017000  | 1.01256100  |

|   |             |            |             |
|---|-------------|------------|-------------|
| H | -2.69888000 | 3.23267200 | -0.70364200 |
| H | -4.23011800 | 4.02472500 | -0.22220300 |

VI.4.29 Int6<sup>M</sup> – As/Si

|    |             |             |             |
|----|-------------|-------------|-------------|
| 0  | 1           |             |             |
| Ga | 2.65951700  | 0.07098700  | -0.02310000 |
| Fe | -1.66380400 | -0.86365000 | 0.88773800  |
| Cl | 2.03284500  | 1.59376500  | 1.51039200  |
| Si | -0.23442400 | 3.09338400  | -0.53816000 |
| N  | -0.94137300 | 3.48366100  | 1.19250600  |
| N  | 3.68152900  | -1.23656300 | 1.00199400  |
| N  | -2.09633000 | 3.57562200  | -0.61594700 |
| N  | 4.18211700  | 0.90978500  | -0.92332000 |
| C  | -1.20668600 | -1.68909600 | 2.72368500  |
| C  | -1.01970800 | -0.27888400 | 2.73275700  |
| C  | -2.56940600 | -1.96069700 | 2.40670800  |
| C  | -2.27885700 | 0.32553300  | 2.42452600  |
| C  | -3.22980300 | -0.71445800 | 2.22068500  |
| C  | -2.10200800 | 3.84344900  | 0.67372400  |
| C  | 5.83046200  | -0.56513200 | 0.07400900  |
| H  | 6.89579800  | -0.79035000 | 0.10145000  |
| C  | 4.99220600  | -1.32760300 | 0.89093600  |
| C  | 5.41496900  | 0.48876700  | -0.74745800 |
| H  | 6.19970700  | 1.02581400  | -1.30241500 |
| H  | 5.47729400  | -2.08881500 | 1.52087000  |
| H  | -2.92510900 | 4.32935100  | 1.22501900  |
| H  | -4.27424600 | -0.58118400 | 1.94312500  |
| H  | -3.02101400 | -2.94589800 | 2.30589300  |
| H  | -0.43765600 | -2.43653200 | 2.91165900  |
| H  | -0.07765800 | 0.24151200  | 2.90265000  |
| H  | -2.47218900 | 1.39322000  | 2.34048000  |
| As | 0.99370400  | -0.59637400 | -1.67177000 |
| As | -0.06245600 | -2.33302800 | -0.24597100 |
| As | -0.65275300 | 0.70109600  | -0.50561300 |
| As | -2.80964500 | -0.03718700 | -1.17425500 |
| As | -2.33082800 | -2.33706600 | -0.96022700 |
| C  | -3.14192600 | 3.81182800  | -1.56521800 |
| H  | -3.44108200 | 2.86942800  | -2.05243000 |
| H  | -4.02963600 | 4.23699200  | -1.06956600 |
| H  | -2.81564200 | 4.51460400  | -2.34872700 |
| C  | -0.50469900 | 3.65950600  | 2.54624900  |
| H  | 0.42911600  | 4.24085100  | 2.58441300  |
| H  | -1.27103000 | 4.19184200  | 3.13333100  |
| H  | -0.30602800 | 2.68888100  | 3.02510100  |
| C  | 3.90699900  | 2.04344000  | -1.77805900 |
| H  | 4.83031700  | 2.43496700  | -2.23409300 |
| H  | 3.21103700  | 1.75716800  | -2.58426400 |
| H  | 3.42616600  | 2.85067700  | -1.20122000 |
| C  | 2.98190300  | -2.05547400 | 1.96886300  |
| H  | 2.18813200  | -2.64291000 | 1.47808000  |
| H  | 3.67220100  | -2.74812000 | 2.47603400  |
| H  | 2.50195600  | -1.41873200 | 2.73063300  |

VI.4.30 Int7<sup>M</sup> – As/Si

|    |             |             |             |
|----|-------------|-------------|-------------|
| 0  | 1           |             |             |
| Ga | 2.72279700  | -0.44215300 | 0.11323400  |
| Fe | -2.18846100 | -1.10879900 | 0.44531200  |
| Cl | 2.29437200  | -0.06846900 | 2.26438000  |
| As | 1.19408000  | 0.50378300  | -1.51026900 |
| As | -1.29921000 | 0.80005600  | 1.63619700  |
| As | -0.55603700 | -1.26262600 | -1.31577700 |
| Si | 0.15611200  | 1.73476100  | 0.13567200  |
| As | -2.61405500 | -0.19023100 | -1.81041700 |
| As | -3.12984800 | 1.11174300  | 0.11975000  |
| N  | 3.15563200  | -2.34341200 | 0.00072900  |
| N  | 1.16547600  | 3.12910300  | 0.89401400  |
| N  | 4.53629000  | 0.22497800  | -0.22055400 |
| N  | -0.34304800 | 3.37844700  | -0.62076500 |
| C  | -3.62025400 | -1.74810700 | 1.82498500  |
| C  | 4.36118500  | -2.76080100 | -0.32294700 |
| C  | 5.53029400  | -0.58210500 | -0.52871000 |
| C  | -3.82987000 | -2.35480900 | 0.55561900  |
| C  | -2.66204700 | -3.09403200 | 0.21925700  |
| C  | 5.48253900  | -1.97556200 | -0.61146700 |
| H  | 6.40011300  | -2.49468700 | -0.88522200 |
| C  | 0.51408900  | 4.01039700  | 0.14969000  |
| C  | -1.71970100 | -2.93569700 | 1.28046700  |

|   |             |             |             |
|---|-------------|-------------|-------------|
| C | -2.31534000 | -2.10556400 | 2.26845400  |
| H | 0.66688700  | 5.10125900  | 0.17613300  |
| H | 6.50078900  | -0.10573200 | -0.73736700 |
| H | 4.50038200  | -3.85198800 | -0.36163700 |
| H | -4.32402500 | -1.10652000 | 2.35275500  |
| H | -4.71771300 | -2.24744500 | -0.06558300 |
| H | -2.51071800 | -3.66666800 | -0.69508500 |
| H | -0.72314400 | -3.36867800 | 1.32888600  |
| H | -1.84704900 | -1.79064100 | 3.19948100  |
| C | 2.12978400  | -3.30356900 | 0.35066800  |
| H | 1.76799000  | -3.10840100 | 1.37336300  |
| H | 1.26810600  | -3.21586300 | -0.33209400 |
| H | 2.51787900  | -4.33337100 | 0.30372100  |
| C | 4.76526800  | 1.64693000  | -0.11353300 |
| H | 3.97268900  | 2.20194500  | -0.64226200 |
| H | 4.74736600  | 1.96714200  | 0.94212500  |
| H | 5.73768800  | 1.93291500  | -0.54586800 |
| C | -1.11518200 | 3.88566600  | -1.71614500 |
| H | -2.14751300 | 3.51274700  | -1.64436900 |
| H | -1.12884900 | 4.98682200  | -1.70299600 |
| H | -0.70066000 | 3.54658300  | -2.67961300 |
| C | 1.92790600  | 3.40657800  | 2.07989100  |
| H | 2.37511700  | 4.41210300  | 2.02257700  |
| H | 1.29760700  | 3.35028400  | 2.98293700  |
| H | 2.72529700  | 2.66138300  | 2.19356000  |

#### VI.4.31 Int8<sup>M</sup> – As/Si

|    |             |             |             |
|----|-------------|-------------|-------------|
| 0  |             |             |             |
| 1  |             |             |             |
| Fe | 2.61966500  | -0.28256800 | 0.63716700  |
| As | 2.36482900  | 1.80135100  | -0.72464200 |
| As | 3.16223200  | -0.13017100 | -1.79059900 |
| As | 2.11476100  | -2.07977800 | -0.98316500 |
| As | 0.34434900  | -1.35383200 | 0.40983000  |
| As | -1.08556200 | -0.15064900 | -1.26625100 |
| Si | 0.24301300  | 1.29042700  | -0.04133700 |
| Ga | -3.12240300 | -0.07193300 | 0.04889500  |
| Cl | -3.64988000 | 1.60962900  | 1.42478100  |
| N  | -0.29882900 | 1.75909400  | 1.66679800  |
| C  | -0.84858700 | 2.89995000  | 1.25176300  |
| N  | -0.63365300 | 3.03995100  | -0.02510300 |
| C  | -0.43358700 | 1.18651500  | 2.97466100  |
| H  | -0.43104900 | 0.09070800  | 2.89108200  |
| H  | 0.39097400  | 1.47616500  | 3.64795700  |
| H  | -1.39260900 | 1.48511800  | 3.42566700  |
| H  | -1.40884400 | 3.59097000  | 1.89650500  |
| C  | -1.09012800 | 4.07489200  | -0.89629300 |
| H  | -1.80895800 | 3.67379300  | -1.63056400 |
| H  | -0.24645100 | 4.50862600  | -1.45651000 |
| H  | -1.58809300 | 4.88139200  | -0.33443800 |
| C  | 2.59461900  | -0.59856300 | 2.67952100  |
| H  | 1.70909600  | -0.79641700 | 3.27955800  |
| C  | 3.39516400  | -1.58554400 | 2.03916300  |
| H  | 3.23225000  | -2.66143000 | 2.07099100  |
| C  | 4.44543500  | -0.91303300 | 1.34710200  |
| H  | 5.21125800  | -1.38308300 | 0.73235100  |
| C  | 4.28944500  | 0.48027500  | 1.55951400  |
| H  | 4.91666700  | 1.26326000  | 1.13675100  |
| C  | 3.13616700  | 0.68112700  | 2.37797200  |
| H  | 2.74340000  | 1.64233600  | 2.70498300  |
| N  | -4.59770900 | -0.09353500 | -1.24454900 |
| C  | -5.48126200 | -1.06754900 | -1.27894600 |
| C  | -5.54230300 | -2.17358200 | -0.42607100 |
| C  | -4.69631700 | -2.39650200 | 0.66450200  |
| N  | -3.66718000 | -1.66664500 | 1.04208100  |
| C  | -4.70014300 | 1.01873200  | -2.16066200 |
| H  | -3.77157400 | 1.12251900  | -2.74754700 |
| H  | -4.85159600 | 1.95862300  | -1.60394700 |
| H  | -5.54030100 | 0.88771200  | -2.86138700 |
| H  | -6.25714000 | -0.99710700 | -2.05701000 |
| H  | -6.33837200 | -2.89684500 | -0.59781800 |
| H  | -4.91853500 | -3.27629200 | 1.28772600  |
| C  | -2.96045200 | -1.99556000 | 2.26135500  |
| H  | -3.03658100 | -1.16142200 | 2.97867700  |
| H  | -3.37949000 | -2.89891800 | 2.73265100  |
| H  | -1.89191700 | -2.17005800 | 2.05285900  |

VI.4.32 Int9<sup>M</sup> – As/Si

|    |             |             |             |  |
|----|-------------|-------------|-------------|--|
| 0  | 1           |             |             |  |
| Ga | -2.92456900 | 0.03689400  | -0.12875100 |  |
| Fe | 2.37621500  | -0.99992200 | 0.14943300  |  |
| Cl | -2.69995400 | -0.54034700 | -2.23839300 |  |
| As | 0.14814300  | 1.82325500  | -1.03908000 |  |
| As | 1.19912100  | -0.30875400 | -1.95339800 |  |
| As | 0.40284100  | -2.12991900 | -0.69497100 |  |
| As | 0.30170400  | -1.00101300 | 1.41327900  |  |
| As | -1.00041200 | 1.04409000  | 0.95949700  |  |
| Si | 1.99310700  | 1.12924500  | 0.19978400  |  |
| N  | -4.41579800 | 1.31586900  | -0.09777800 |  |
| N  | -3.84856400 | -1.40997300 | 0.80809500  |  |
| N  | 2.36172200  | 2.21870800  | 1.68744700  |  |
| N  | 3.39859200  | 2.34085900  | -0.19250300 |  |
| C  | 3.59315600  | -1.63272500 | 1.69609600  |  |
| C  | 3.30069900  | -2.71377700 | 0.82355100  |  |
| C  | 3.76998100  | -2.36962400 | -0.48260500 |  |
| C  | 4.35338600  | -1.07892700 | -0.41439800 |  |
| C  | 4.22968000  | -0.61084200 | 0.93213900  |  |
| C  | 3.29091200  | 2.86626800  | 1.01127800  |  |
| C  | -5.55712400 | 1.04762200  | 0.49490600  |  |
| C  | -5.89524500 | -0.13561500 | 1.16101200  |  |
| H  | -6.88874000 | -0.19712700 | 1.60342700  |  |
| C  | -5.07824500 | -1.26573300 | 1.25817600  |  |
| H  | -6.32779700 | 1.83348600  | 0.45481800  |  |
| H  | -5.51247300 | -2.14350200 | 1.76132800  |  |
| H  | 3.87535300  | 3.72046700  | 1.39048800  |  |
| H  | 4.61579700  | 0.32999900  | 1.32159900  |  |
| H  | 4.78915200  | -0.53144600 | -1.24840300 |  |
| H  | 3.67484500  | -2.98316700 | -1.37696700 |  |
| H  | 2.79472900  | -3.63837000 | 1.09659700  |  |
| H  | 3.34042300  | -1.57852400 | 2.75381800  |  |
| C  | 4.16178800  | 2.81886400  | -1.30387900 |  |
| H  | 3.49985900  | 3.18043700  | -2.10819200 |  |
| H  | 4.82226600  | 3.64761200  | -1.00193000 |  |
| H  | 4.78706500  | 2.01473500  | -1.72226700 |  |
| C  | 1.94272300  | 2.40319600  | 3.04399500  |  |
| H  | 2.49351500  | 3.23346900  | 3.51454900  |  |
| H  | 0.86450300  | 2.62402200  | 3.08387100  |  |
| H  | 2.11789900  | 1.48891800  | 3.63389100  |  |
| C  | -4.22739100 | 2.56451200  | -0.79944100 |  |
| H  | -3.35551700 | 3.10630300  | -0.39511900 |  |
| H  | -4.03031500 | 2.37366400  | -1.86718500 |  |
| H  | -5.11393400 | 3.21343000  | -0.71265300 |  |
| C  | -3.17829000 | -2.68613000 | 0.94576800  |  |
| H  | -2.85782800 | -3.05486700 | -0.04212600 |  |
| H  | -2.27257500 | -2.58725900 | 1.56638800  |  |
| H  | -3.84439900 | -3.43510700 | 1.40357100  |  |

VI.4.33 Int1<sup>M</sup> – P/Ge

|    |             |             |             |  |
|----|-------------|-------------|-------------|--|
| 0  | 1           |             |             |  |
| Ga | -2.42249600 | 0.99451200  | 0.02548300  |  |
| Fe | 3.47522300  | -0.14722200 | -0.05043900 |  |
| Cl | -4.62526400 | 1.08382100  | -0.13150800 |  |
| P  | 0.80564800  | -1.74542300 | -0.68826500 |  |
| Ge | -1.65551000 | -1.29948000 | -0.39560800 |  |
| P  | 1.89049100  | -0.24878900 | -1.86039700 |  |
| P  | 1.68079700  | -1.15828100 | 1.23066000  |  |
| P  | 1.93625800  | 0.99270200  | 1.30675900  |  |
| P  | 2.05911900  | 1.59124300  | -0.73905000 |  |
| N  | -2.16238100 | -2.48278900 | 1.09382100  |  |
| N  | -1.60442000 | 2.26340700  | -1.18610000 |  |
| N  | -1.77962700 | 1.75358700  | 1.68249300  |  |
| N  | -3.15696100 | -2.50101400 | -0.83930700 |  |
| C  | 5.25934200  | 0.75220200  | 0.30047800  |  |
| C  | 5.01528900  | -1.15116300 | -0.97718100 |  |
| C  | 5.09251800  | -0.35341300 | 1.18469400  |  |
| C  | 5.21535800  | 0.26003900  | -1.03628900 |  |
| C  | -1.04047400 | 3.36576300  | -0.73336700 |  |
| C  | -1.18656900 | 2.93463800  | 1.69981400  |  |
| C  | -0.89313700 | 3.74434800  | 0.60364700  |  |
| H  | -0.40900300 | 4.69924600  | 0.80208200  |  |
| C  | -3.12516900 | -3.02317100 | 0.37463400  |  |
| C  | 4.93962900  | -1.52792400 | 0.39087300  |  |
| H  | -3.81081100 | -3.80747500 | 0.73406900  |  |
| H  | 5.28233200  | 0.86070200  | -1.94189600 |  |

|   |             |             |             |
|---|-------------|-------------|-------------|
| H | 4.89737400  | -1.81611600 | -1.83089800 |
| H | -0.62291800 | 4.04422600  | -1.49118100 |
| H | -0.87468600 | 3.30367000  | 2.68770500  |
| H | 4.75024700  | -2.53199300 | 0.76658000  |
| H | 5.05021900  | -0.30349900 | 2.27143300  |
| H | 5.36772000  | 1.79535700  | 0.59406000  |
| C | -1.52447000 | 1.93956300  | -2.59423200 |
| H | -0.77082200 | 1.14857800  | -2.76313200 |
| H | -2.50106400 | 1.59036700  | -2.96476100 |
| H | -1.22406100 | 2.81756200  | -3.18710400 |
| C | -1.83211800 | 0.96657000  | 2.89592400  |
| H | -2.79431600 | 0.43635500  | 2.96785800  |
| H | -1.01482100 | 0.22315800  | 2.90776700  |
| H | -1.72281100 | 1.60415700  | 3.78736700  |
| C | -4.22755700 | -2.58986800 | -1.79091300 |
| H | -4.86499500 | -3.46237400 | -1.57375100 |
| H | -4.85592600 | -1.68362700 | -1.76290100 |
| H | -3.82689500 | -2.70766200 | -2.80851800 |
| C | -1.66023100 | -2.92382500 | 2.36464000  |
| H | -2.16170800 | -3.85370100 | 2.67703400  |
| H | -0.57597900 | -3.10679000 | 2.30540700  |
| H | -1.82509700 | -2.16048600 | 3.14100900  |

VI.4.34 Int2<sup>M</sup> – P/Ge

|    |             |             |             |
|----|-------------|-------------|-------------|
| 0  | 1           |             |             |
| Ga | 0.08574800  | 2.06744400  | -0.03271900 |
| Fe | -1.91060900 | -1.59067600 | 0.07377900  |
| Cl | 1.91638100  | 3.25578700  | 0.31410600  |
| P  | 0.76381200  | -0.13864200 | -0.39303700 |
| Ge | 3.17772000  | -0.09695900 | -0.82726900 |
| P  | -0.75829500 | -0.81989500 | -1.79363000 |
| P  | -0.00386900 | -1.15022800 | 1.37887000  |
| P  | -0.30452100 | -3.16437900 | 0.65196000  |
| P  | -0.75641400 | -2.95210800 | -1.43697000 |
| N  | 3.25962700  | -1.99983300 | -0.11883400 |
| N  | -1.19261500 | 2.46459100  | 1.36534700  |
| N  | -0.90015100 | 2.81174900  | -1.52756200 |
| N  | 3.35246400  | -0.25911000 | 1.17909600  |
| C  | -3.69615700 | -2.56880600 | 0.24813000  |
| C  | -3.50137100 | -0.28758300 | -0.03106000 |
| C  | -3.34278600 | -2.00233800 | 1.50560000  |
| C  | -3.80110400 | -1.51230200 | -0.70074400 |
| C  | -2.35603300 | 3.01786700  | 1.08370400  |
| C  | -2.11146300 | 3.30112600  | -1.37162400 |
| C  | -2.83013400 | 3.39739800  | -0.17467200 |
| H  | -3.82689600 | 3.83375200  | -0.22222200 |
| C  | 3.35315500  | -1.57942200 | 1.12318800  |
| C  | -3.21994700 | -0.59423700 | 1.32803800  |
| H  | 3.43099400  | -2.24121900 | 2.00233400  |
| H  | -4.03779800 | -1.62399300 | -1.75778700 |
| H  | -3.47761200 | 0.70531000  | -0.47723600 |
| H  | -3.02186300 | 3.20404000  | 1.93958300  |
| H  | -2.60437100 | 3.67928500  | -2.27967500 |
| H  | -2.92962000 | 0.12076500  | 2.09534400  |
| H  | -3.16474800 | -2.55172000 | 2.42846200  |
| H  | -3.83533000 | -3.62884700 | 0.04086200  |
| C  | -0.83143400 | 2.18896900  | 2.74067300  |
| H  | -0.63762000 | 1.11138300  | 2.87591900  |
| H  | 0.08722800  | 2.73605900  | 3.00797200  |
| H  | -1.63466800 | 2.49540300  | 3.42912500  |
| C  | -0.27619700 | 2.79557200  | -2.83440600 |
| H  | 0.69957000  | 3.30517000  | -2.79399800 |
| H  | -0.11162700 | 1.75564000  | -3.16341100 |
| H  | -0.90754800 | 3.30134000  | -3.58140900 |
| C  | 3.25260100  | 0.53708000  | 2.36528300  |
| H  | 3.78116700  | 0.05852700  | 3.20726200  |
| H  | 3.69484300  | 1.52741700  | 2.19173100  |
| H  | 2.19974400  | 0.68745400  | 2.66552400  |
| C  | 3.27422000  | -3.35947900 | -0.56755500 |
| H  | 3.35088100  | -4.05107000 | 0.28767200  |
| H  | 2.34488100  | -3.60063900 | -1.10761000 |
| H  | 4.12644800  | -3.54899500 | -1.24118200 |

VI.4.35 Int3<sup>M</sup> – P/Ge

|    |             |             |             |
|----|-------------|-------------|-------------|
| 0  | 1           |             |             |
| Ga | 0.08574800  | 2.06744400  | -0.03271900 |
| Fe | -1.91060900 | -1.59067600 | 0.07377900  |

|    |             |             |             |
|----|-------------|-------------|-------------|
| Cl | 1.91638100  | 3.25578700  | 0.31410600  |
| P  | 0.76381200  | -0.13864200 | -0.39303700 |
| Ge | 3.17772000  | -0.09695900 | -0.82726900 |
| P  | -0.75829500 | -0.81989500 | -1.79363000 |
| P  | -0.00386900 | -1.15022800 | 1.37887000  |
| P  | -0.30452100 | -3.16437900 | 0.65196000  |
| P  | -0.75641400 | -2.95210800 | -1.43697000 |
| N  | 3.25962700  | -1.99983300 | -0.11883400 |
| N  | -1.19261500 | 2.46459100  | 1.36534700  |
| N  | -0.90015100 | 2.81174900  | -1.52756200 |
| N  | 3.35246400  | -0.25911000 | 1.17909600  |
| C  | -3.69615700 | -2.56880600 | 0.24813000  |
| C  | -3.50137100 | -0.28758300 | -0.03106000 |
| C  | -3.34278600 | -2.00233800 | 1.50560000  |
| C  | -3.80110400 | -1.51230200 | -0.70074400 |
| C  | -2.35603300 | 3.01786700  | 1.08370400  |
| C  | -2.11146300 | 3.30112600  | -1.37162400 |
| C  | -2.83013400 | 3.39739800  | -0.17467200 |
| H  | -3.82689600 | 3.83375200  | -0.22222200 |
| C  | 3.35315500  | -1.57942200 | 1.12318800  |
| C  | -3.21994700 | -0.59423700 | 1.32803800  |
| H  | 3.43099400  | -2.24121900 | 2.00233400  |
| H  | -4.03779800 | -1.62399300 | -1.75778700 |
| H  | -3.47761200 | 0.70531000  | -0.47723600 |
| H  | -3.02186300 | 3.20404000  | 1.93958300  |
| H  | -2.60437100 | 3.67928500  | -2.27967500 |
| H  | -2.92962000 | 0.12076500  | 2.09534400  |
| H  | -3.16474800 | -2.55172000 | 2.42846200  |
| H  | -3.83533000 | -3.62884700 | 0.04086200  |
| C  | -0.83143400 | 2.18896900  | 2.74067300  |
| H  | -0.63762000 | 1.11138300  | 2.87591900  |
| H  | 0.08722800  | 2.73605900  | 3.00797200  |
| H  | -1.63466800 | 2.49540300  | 3.42912500  |
| C  | -0.27619700 | 2.79557200  | -2.83440600 |
| H  | 0.69957000  | 3.30517000  | -2.79399800 |
| H  | -0.11162700 | 1.75564000  | -3.16341100 |
| H  | -0.90754800 | 3.30134000  | -3.58140900 |
| C  | 3.25260100  | 0.53708000  | 2.36528300  |
| H  | 3.78116700  | 0.05852700  | 3.20726200  |
| H  | 3.69484300  | 1.52741700  | 2.19173100  |
| H  | 2.19974400  | 0.68745400  | 2.66552400  |
| C  | 3.27422000  | -3.35947900 | -0.56755500 |
| H  | 3.35088100  | -4.05107000 | 0.28767200  |
| H  | 2.34488100  | -3.60063900 | -1.10761000 |
| H  | 4.12644800  | -3.54899500 | -1.24118200 |

#### VI.4.36 Int4<sup>M</sup> – P/Ge

|     |             |             |             |
|-----|-------------|-------------|-------------|
| 0 1 |             |             |             |
| Ga  | -2.92334900 | -0.92878600 | -0.00000900 |
| Fe  | 1.22041300  | 1.74213600  | 0.00005900  |
| Cl  | -4.12293500 | -2.76717400 | -0.00020700 |
| Ge  | 2.46022300  | -0.97570700 | -0.00003600 |
| N   | 2.84096700  | -2.93698700 | -0.00014700 |
| N   | -3.52907700 | 0.21372500  | 1.46044300  |
| N   | 4.39848900  | -1.41999100 | -0.00024000 |
| N   | -3.52915400 | 0.21407100  | -1.46016000 |
| C   | 0.17980600  | 3.49081500  | 0.00033300  |
| C   | 1.01639100  | 3.42613300  | 1.15158800  |
| C   | 1.01600300  | 3.42628300  | -1.15121500 |
| C   | 2.36899900  | 3.32849700  | 0.70815900  |
| C   | 2.36875500  | 3.32859600  | -0.70825700 |
| C   | 4.13647500  | -2.71077000 | -0.00029300 |
| C   | -4.11056700 | 2.06663200  | 0.00037700  |
| H   | -4.46246400 | 3.09752700  | 0.00050800  |
| C   | -3.93869500 | 1.44464000  | 1.24187000  |
| C   | -3.93876800 | 1.44493200  | -1.24127200 |
| H   | -4.18397800 | 2.04156800  | -2.13317000 |
| H   | -4.18384500 | 2.04107000  | 2.13392300  |
| H   | 4.90776400  | -3.49953600 | -0.00049500 |
| H   | 3.24349500  | 3.23420500  | -1.34912900 |
| H   | 0.68062700  | 3.43154000  | -2.18754600 |
| H   | -0.90854500 | 3.54182300  | 0.00052000  |
| H   | 0.68136900  | 3.43125800  | 2.18803400  |
| H   | 3.24395800  | 3.23403300  | 1.34872000  |
| P   | -0.59935000 | -1.23741600 | -0.00008500 |
| P   | -0.13836100 | 0.48231500  | -1.38365000 |
| P   | -0.13834300 | 0.48218000  | 1.38365300  |
| P   | 1.97132900  | 0.28889500  | 1.79992200  |

|   |             |             |             |
|---|-------------|-------------|-------------|
| P | 1.97130500  | 0.28901300  | -1.79991400 |
| C | 5.67723200  | -0.77886200 | -0.00094600 |
| H | 5.79719600  | -0.13989300 | 0.88897700  |
| H | 6.49038400  | -1.52340700 | -0.00097000 |
| H | 5.79656800  | -0.14051300 | -0.89140600 |
| C | 2.14649800  | -4.18779900 | 0.00039100  |
| H | 1.49826800  | -4.27521400 | -0.88573300 |
| H | 2.85641700  | -5.03143700 | -0.00144700 |
| H | 1.50143100  | -4.27642800 | 0.88872300  |
| C | -3.42745100 | -0.29481400 | -2.80915400 |
| H | -3.84277500 | 0.41998200  | -3.53730600 |
| H | -2.36998300 | -0.47639600 | -3.06893000 |
| H | -3.97481400 | -1.24675000 | -2.89614400 |
| C | -3.42727000 | -0.29547000 | 2.80931100  |
| H | -2.36978200 | -0.47711200 | 3.06896500  |
| H | -3.84253800 | 0.41915700  | 3.53766100  |
| H | -3.97462400 | -1.24742800 | 2.89612400  |

#### VI.4.37 Int5<sup>M</sup> – P/Ge

|     |             |             |             |
|-----|-------------|-------------|-------------|
| 0 1 |             |             |             |
| Ga  | -3.15029500 | 0.22927700  | 0.06082200  |
| Fe  | 1.00692900  | -1.12612200 | 0.26744000  |
| Cl  | -2.84164200 | -0.84219100 | 1.97164600  |
| P   | 0.13583400  | 1.01976700  | 0.21105500  |
| P   | 1.85484400  | 0.53005200  | -0.98148900 |
| P   | 1.43102000  | -1.29423800 | -2.03222600 |
| P   | -0.60923500 | -1.47532800 | -1.33010600 |
| P   | -1.36267800 | 0.62520500  | -1.38516500 |
| Ge  | 3.98440600  | 1.68078300  | -1.00440300 |
| N   | -4.65283700 | -0.65070400 | -0.82261300 |
| N   | -4.07405200 | 1.88992200  | 0.51593200  |
| N   | 4.94130200  | 0.07381800  | -0.20872900 |
| N   | 4.01183300  | 1.60674100  | 1.02374700  |
| C   | 0.23242300  | -2.58315300 | 1.51879300  |
| C   | 1.41162200  | -3.05721100 | 0.87571000  |
| C   | 2.48327000  | -2.18583700 | 1.22309600  |
| C   | 1.96687700  | -1.18052500 | 2.09375600  |
| C   | 0.57512300  | -1.42412700 | 2.26689500  |
| C   | 4.70566500  | 0.48858100  | 1.01700700  |
| C   | -5.80940300 | -0.04394200 | -0.98270400 |
| C   | -6.15146900 | 1.24746500  | -0.56693300 |
| H   | -7.15767500 | 1.59648900  | -0.79546800 |
| C   | -5.31841100 | 2.11187500  | 0.15063000  |
| H   | -6.59366700 | -0.62152200 | -1.49611800 |
| H   | -5.74810700 | 3.08125900  | 0.44745800  |
| H   | 5.04416400  | -0.03830900 | 1.92749700  |
| H   | -0.12671300 | -0.82297200 | 2.84103100  |
| H   | 2.52243600  | -0.35869100 | 2.53947000  |
| H   | 3.51120400  | -2.27968300 | 0.87884900  |
| H   | 1.47727400  | -3.91446400 | 0.20754300  |
| H   | -0.76904600 | -3.00019100 | 1.43719300  |
| C   | 3.47021900  | 2.28568400  | 2.16108800  |
| H   | 2.36695300  | 2.25089200  | 2.14654600  |
| H   | 3.81782900  | 1.81880200  | 3.09834400  |
| H   | 3.77674800  | 3.34390600  | 2.17641000  |
| C   | 5.62459700  | -1.11898400 | -0.60362200 |
| H   | 6.00636900  | -1.66301600 | 0.27699000  |
| H   | 4.94659900  | -1.79299000 | -1.15413700 |
| H   | 6.48188600  | -0.89278100 | -1.25843700 |
| C   | -4.48104500 | -2.02234000 | -1.25027600 |
| H   | -3.59158400 | -2.11889800 | -1.89403900 |
| H   | -4.32200900 | -2.67644900 | -0.37699900 |
| H   | -5.36298900 | -2.38095800 | -1.80484100 |
| C   | -3.35421000 | 2.86451000  | 1.30391000  |
| H   | -3.10258300 | 2.44559400  | 2.29232800  |
| H   | -2.40502900 | 3.13438300  | 0.81137600  |
| H   | -3.94819800 | 3.78112300  | 1.44951800  |

#### VI.4.38 Int6<sup>M</sup> – P/Ge

|     |             |             |             |
|-----|-------------|-------------|-------------|
| 0 1 |             |             |             |
| Ga  | 2.34002800  | 0.17818200  | -0.09474500 |
| Fe  | -1.49972500 | -1.71351000 | 0.17029900  |
| Cl  | 1.38994500  | 1.33593200  | 1.57883400  |
| Ge  | -1.05023300 | 2.56958600  | -0.31155900 |
| N   | -1.98066900 | 2.37666700  | 1.47599900  |
| N   | 3.47614500  | -1.14230800 | 0.77016200  |
| N   | -3.10651800 | 2.52164900  | -0.38248400 |

|   |             |             |             |
|---|-------------|-------------|-------------|
| N | 3.76707600  | 1.34514200  | -0.74084000 |
| C | -0.93915600 | -2.84210800 | 1.80650000  |
| C | -1.11682500 | -1.47561900 | 2.15983800  |
| C | -2.17027400 | -3.33694800 | 1.28823900  |
| C | -2.47132600 | -1.12565700 | 1.86177200  |
| C | -3.11527900 | -2.27437900 | 1.32107200  |
| C | -3.17527900 | 2.47876400  | 0.92739600  |
| C | 5.55355800  | -0.02590100 | 0.15940800  |
| H | 6.63669200  | -0.10243700 | 0.24487500  |
| C | 4.79022000  | -1.02952900 | 0.76028900  |
| C | 5.03667200  | 1.07857800  | -0.52589400 |
| H | 5.76388800  | 1.80100200  | -0.92726600 |
| H | 5.34392400  | -1.81887600 | 1.29074700  |
| H | -4.11674900 | 2.53694700  | 1.50375000  |
| H | -4.14255300 | -2.32262000 | 0.96313600  |
| H | -2.34819600 | -4.34044000 | 0.90600400  |
| H | -0.01542500 | -3.41136800 | 1.89267300  |
| H | -0.35137600 | -0.80627800 | 2.55094000  |
| H | -2.92168700 | -0.14590400 | 2.00285200  |
| P | 0.91317300  | -0.35545200 | -1.87196000 |
| P | 0.31321400  | -2.39699500 | -1.11609900 |
| P | -0.87324100 | 0.19836500  | -0.73835700 |
| P | -2.57780700 | -0.74223200 | -1.68631200 |
| P | -1.67065500 | -2.67813700 | -1.94336300 |
| C | -4.20605000 | 2.60801800  | -1.29470700 |
| H | -4.23259900 | 1.72633800  | -1.95647200 |
| H | -5.16553800 | 2.65446800  | -0.75177200 |
| H | -4.12940800 | 3.50804600  | -1.92670200 |
| C | -1.68057100 | 2.37888000  | 2.87556300  |
| H | -1.07314300 | 3.25514100  | 3.15573000  |
| H | -2.60817000 | 2.40073500  | 3.47282500  |
| H | -1.10790300 | 1.48165700  | 3.15567900  |
| C | 3.37681300  | 2.54783600  | -1.44274300 |
| H | 4.25632500  | 3.11064800  | -1.79381300 |
| H | 2.75036800  | 2.29499000  | -2.31430000 |
| H | 2.78090600  | 3.20025000  | -0.78306400 |
| C | 2.85261900  | -2.22859700 | 1.49710400  |
| H | 2.21046600  | -2.81988700 | 0.82344600  |
| H | 3.61038400  | -2.89227300 | 1.94259200  |
| H | 2.21696100  | -1.83141700 | 2.30563400  |

#### VI.4.39 Int7<sup>M</sup> – P/Ge

|     |             |             |             |
|-----|-------------|-------------|-------------|
| 0 1 |             |             |             |
| Ga  | 2.20441000  | -0.67857400 | -0.03974600 |
| Fe  | -2.58314700 | -0.95167900 | 0.15365300  |
| Cl  | 1.65555900  | -0.42492900 | 2.10296400  |
| P   | 0.75433900  | 0.34671300  | -1.55047500 |
| P   | -1.92103000 | 0.95090900  | 1.21654400  |
| P   | -0.90355200 | -1.17740000 | -1.39628100 |
| Ge  | -0.13385600 | 1.67438800  | 0.05689200  |
| P   | -2.70691300 | -0.19253100 | -2.04883300 |
| P   | -3.30479700 | 1.16727900  | -0.46332300 |
| N   | 2.59445400  | -2.57240400 | -0.27168800 |
| N   | 1.05819800  | 2.99602100  | 0.95792700  |
| N   | 4.02987700  | -0.02174400 | -0.27472600 |
| N   | -0.34479700 | 3.53495700  | -0.61485700 |
| C   | -3.92619200 | -1.46197200 | 1.63846200  |
| C   | 3.80627600  | -2.99421400 | -0.56442900 |
| C   | 5.02252700  | -0.83148100 | -0.58424600 |
| C   | -4.36304800 | -1.96739400 | 0.38383200  |
| C   | -3.36382200 | -2.85218000 | -0.10860900 |
| C   | 4.95557200  | -2.21668300 | -0.74469900 |
| H   | 5.87577400  | -2.73726500 | -1.00654400 |
| C   | 0.53747200  | 3.98227900  | 0.24405600  |
| C   | -2.30505000 | -2.89099300 | 0.84581100  |
| C   | -2.64709300 | -2.03171900 | 1.92120500  |
| H   | 0.80921100  | 5.04444800  | 0.36333100  |
| H   | 6.00794200  | -0.36246100 | -0.72857800 |
| H   | 3.92498600  | -4.08290100 | -0.67323400 |
| H   | -4.45882700 | -0.74366200 | 2.26032100  |
| H   | -5.28201500 | -1.69161000 | -0.13134900 |
| H   | -3.38948200 | -3.38221100 | -1.05939300 |
| H   | -1.38289200 | -3.46050700 | 0.75502800  |
| H   | -2.02833200 | -1.82581800 | 2.79294000  |
| C   | 1.52897100  | -3.53021900 | -0.05357300 |
| H   | 1.13325900  | -3.42225800 | 0.96956600  |
| H   | 0.69904300  | -3.34479000 | -0.75585900 |
| H   | 1.89208700  | -4.56168900 | -0.18515700 |



|   |             |            |             |
|---|-------------|------------|-------------|
| C | 4.27885800  | 1.39083300 | -0.09898200 |
| H | 3.51193900  | 1.98235600 | -0.62495000 |
| H | 4.23497100  | 1.66691900 | 0.96779500  |
| H | 5.26834600  | 1.67594900 | -0.49091000 |
| C | -1.04707000 | 4.24761500 | -1.63826000 |
| H | -2.12329300 | 4.02357500 | -1.57790300 |
| H | -0.90557700 | 5.33521600 | -1.52848100 |
| H | -0.69851600 | 3.94749300 | -2.64005200 |
| C | 1.80686100  | 3.13706100 | 2.17595900  |
| H | 2.55229700  | 3.94580800 | 2.08998400  |
| H | 1.15405000  | 3.35293800 | 3.03917800  |
| H | 2.32865800  | 2.19536000 | 2.39026000  |

VI.4.40 Int8<sup>M</sup> – P/Ge

|    |             |             |             |
|----|-------------|-------------|-------------|
| 0  | 1           |             |             |
| Fe | 2.89282700  | -0.62163200 | 0.05743500  |
| P  | 2.75302800  | 1.51235100  | -0.94374600 |
| P  | 3.19466100  | -0.15142900 | -2.22707300 |
| P  | 2.13498500  | -1.95336900 | -1.69847000 |
| P  | 0.66492800  | -1.44851600 | -0.20809200 |
| P  | -0.77479000 | -0.11509100 | -1.38368700 |
| Ge | 0.61642600  | 1.30097600  | -0.31419700 |
| Ga | -2.64044900 | -0.22620400 | 0.01767200  |
| Cl | -3.15532000 | 1.40425100  | 1.43957000  |
| N  | 0.21844800  | 1.65571400  | 1.55992900  |
| C  | -0.34921400 | 2.82772100  | 1.30556500  |
| N  | -0.25921300 | 3.14353800  | 0.04382500  |
| C  | 0.19949200  | 0.95358100  | 2.80757400  |
| H  | 0.03065800  | -0.11753000 | 2.62586500  |
| H  | 1.14948700  | 1.05439600  | 3.35945200  |
| H  | -0.62325100 | 1.31719800  | 3.44313000  |
| H  | -0.84748100 | 3.43712400  | 2.07423800  |
| C  | -0.82927600 | 4.28536400  | -0.59981300 |
| H  | -1.63872300 | 3.98598200  | -1.28698100 |
| H  | -0.06936400 | 4.82065500  | -1.19118300 |
| H  | -1.25367700 | 4.99064500  | 0.13420500  |
| C  | 2.98111100  | -1.13901800 | 2.05974800  |
| H  | 2.12134800  | -1.25140700 | 2.71631000  |
| C  | 3.54616100  | -2.16728600 | 1.25397900  |
| H  | 3.19811100  | -3.19714600 | 1.19267600  |
| C  | 4.63403700  | -1.60191600 | 0.52526700  |
| H  | 5.24958600  | -2.11954700 | -0.20882600 |
| C  | 4.73715000  | -0.23246000 | 0.87960700  |
| H  | 5.44716200  | 0.48242500  | 0.46669600  |
| C  | 3.70617200  | 0.05986400  | 1.82444400  |
| H  | 3.50737300  | 1.03218000  | 2.27215500  |
| N  | -4.18248000 | -0.35590700 | -1.17999400 |
| C  | -4.98220300 | -1.40019800 | -1.17433800 |
| C  | -4.89281900 | -2.51746700 | -0.33846400 |
| C  | -3.94775200 | -2.69030300 | 0.67639600  |
| N  | -2.95676600 | -1.88279600 | 0.99666500  |
| C  | -4.42222600 | 0.74659900  | -2.08276700 |
| H  | -3.53522800 | 0.92404900  | -2.71423500 |
| H  | -4.62062600 | 1.67012700  | -1.51381800 |
| H  | -5.28352700 | 0.54810400  | -2.74045600 |
| H  | -5.80912400 | -1.38734500 | -1.90098900 |
| H  | -5.63655800 | -3.30252900 | -0.46813600 |
| H  | -4.04259900 | -3.60109700 | 1.28694200  |
| C  | -2.11956400 | -2.19051100 | 2.13719100  |
| H  | -2.18886300 | -1.38350600 | 2.88517600  |
| H  | -2.43082200 | -3.13341300 | 2.61421400  |
| H  | -1.06718200 | -2.28495400 | 1.82079000  |

VI.4.41 Int9<sup>M</sup> – P/Ge

|    |             |             |             |
|----|-------------|-------------|-------------|
| 0  | 1           |             |             |
| Ga | -2.90399400 | 0.06645400  | -0.16965600 |
| Fe | 2.16260800  | -1.24667400 | 0.08993300  |
| Cl | -2.83825600 | -0.65538900 | -2.24137700 |
| P  | 0.11914300  | 1.39304100  | -1.23530200 |
| P  | 0.99427500  | -0.65964700 | -1.94067500 |
| P  | 0.19625400  | -2.18663100 | -0.68302200 |
| P  | 0.11738200  | -1.08380500 | 1.19216200  |
| P  | -0.87502000 | 0.85502000  | 0.67524400  |
| Ge | 1.99998900  | 0.96950900  | 0.00505100  |
| N  | -4.24392800 | 1.49079100  | -0.10890900 |
| N  | -3.87906100 | -1.23010900 | 0.91144400  |
| N  | 2.38904900  | 2.32404600  | 1.41122500  |

|   |             |             |             |
|---|-------------|-------------|-------------|
| N | 3.51195000  | 2.19811600  | -0.44823600 |
| C | 3.32342400  | -1.91983200 | 1.66627000  |
| C | 2.88750100  | -3.00582900 | 0.86196700  |
| C | 3.37785900  | -2.80111500 | -0.46596000 |
| C | 4.11700200  | -1.59133200 | -0.48224600 |
| C | 4.07028500  | -1.03616600 | 0.83511800  |
| C | 3.35392800  | 2.84776400  | 0.68689200  |
| C | -5.35771100 | 1.36958000  | 0.57850200  |
| C | -5.75993000 | 0.26032800  | 1.33023400  |
| H | -6.71836900 | 0.32272800  | 1.84409200  |
| C | -5.05161200 | -0.94087000 | 1.43681700  |
| H | -6.04583300 | 2.22899200  | 0.55215100  |
| H | -5.52940500 | -1.74358500 | 2.01934400  |
| H | 3.95098200  | 3.72520600  | 0.98831200  |
| H | 4.55793700  | -0.11687600 | 1.15862100  |
| H | 4.60344800  | -1.15045800 | -1.35069200 |
| H | 3.19040300  | -3.44854700 | -1.32103500 |
| H | 2.27181500  | -3.84094000 | 1.19217200  |
| H | 3.08935600  | -1.76756200 | 2.71839000  |
| C | 4.42627200  | 2.49645100  | -1.50713900 |
| H | 3.88759300  | 2.73486700  | -2.43878000 |
| H | 5.06206200  | 3.35982300  | -1.24962700 |
| H | 5.08588200  | 1.63806700  | -1.71495300 |
| C | 1.88866100  | 2.75996100  | 2.67940300  |
| H | 2.37290100  | 3.69960200  | 2.99335500  |
| H | 0.80112100  | 2.92369300  | 2.62023800  |
| H | 2.06679100  | 2.00049800  | 3.45832000  |
| C | -3.97906800 | 2.68245500  | -0.88204800 |
| H | -3.02166000 | 3.13510100  | -0.57362400 |
| H | -3.89329400 | 2.43073700  | -1.95186000 |
| H | -4.77887900 | 3.43000300  | -0.75596500 |
| C | -3.32017400 | -2.55695700 | 1.07304400  |
| H | -3.11919700 | -3.00483100 | 0.08631600  |
| H | -2.35983600 | -2.50958400 | 1.61256600  |
| H | -4.01233100 | -3.21236500 | 1.62560700  |

#### VI.4.42 Int1<sup>M</sup> – As/Ge

|     |             |             |             |
|-----|-------------|-------------|-------------|
| 0 1 |             |             |             |
| Ga  | -2.61781100 | 0.81563700  | 0.00654200  |
| Fe  | 2.84963800  | 0.31569700  | 0.15417900  |
| Cl  | -4.74418200 | 0.17226500  | -0.00287500 |
| As  | 0.56554600  | -1.92703200 | -1.46316300 |
| Ge  | -1.27266000 | -1.22255400 | -0.11442700 |
| As  | 1.57404300  | 0.25975500  | -1.94497000 |
| As  | 1.78372500  | -1.75411200 | 0.65669600  |
| As  | 0.90699700  | 0.27179900  | 1.66589300  |
| As  | 0.96099900  | 1.75516000  | -0.19827000 |
| N   | -1.70303200 | -2.37309600 | 1.41300100  |
| N   | -2.34481200 | 2.10681200  | -1.40645200 |
| N   | -2.44196900 | 2.00338900  | 1.52194800  |
| N   | -2.75776300 | -2.61911600 | -0.47440900 |
| C   | 4.14524900  | 1.58019700  | 1.11567900  |
| C   | 4.69830800  | 0.39208600  | -0.77986200 |
| C   | 4.40896900  | 0.23539900  | 1.50280300  |
| C   | 4.33427100  | 1.67946700  | -0.29342100 |
| C   | -2.19435400 | 3.38688300  | -1.13214800 |
| C   | -2.28600800 | 3.30041500  | 1.34797500  |
| C   | -2.18325900 | 3.98135000  | 0.13237100  |
| H   | -2.05245900 | 5.06163400  | 0.17501800  |
| C   | -2.66771800 | -3.01290100 | 0.76563600  |
| C   | 4.74642400  | -0.49892400 | 0.32865000  |
| H   | -3.31304300 | -3.77311800 | 1.23653900  |
| H   | 4.19742300  | 2.57647800  | -0.89534900 |
| H   | 4.89029100  | 0.13085100  | -1.81882500 |
| H   | -2.05280900 | 4.05354900  | -1.99554800 |
| H   | -2.22972100 | 3.90762800  | 2.26363300  |
| H   | 4.99488900  | -1.55794500 | 0.28493800  |
| H   | 4.34090400  | -0.16537900 | 2.51318200  |
| H   | 3.83996600  | 2.38878900  | 1.77835800  |
| C   | -2.23791900 | 1.63334100  | -2.76872100 |
| H   | -1.30255900 | 1.05950200  | -2.89918200 |
| H   | -3.09047900 | 0.98081100  | -3.01542000 |
| H   | -2.22531500 | 2.47288000  | -3.48133100 |
| C   | -2.53880900 | 1.44777300  | 2.85276900  |
| H   | -3.47683700 | 0.87944500  | 2.96025800  |
| H   | -1.69294600 | 0.76517400  | 3.04346300  |
| H   | -2.51856500 | 2.24047900  | 3.61695300  |
| C   | -3.76850100 | -2.98130600 | -1.42021500 |

|   |             |             |             |
|---|-------------|-------------|-------------|
| H | -4.32759600 | -3.87085100 | -1.08390100 |
| H | -4.48710200 | -2.15610400 | -1.55710700 |
| H | -3.31197600 | -3.21459800 | -2.39491800 |
| C | -1.24781700 | -2.61743900 | 2.75009000  |
| H | -1.90477700 | -3.35183800 | 3.24449600  |
| H | -0.21594600 | -3.00329000 | 2.75523600  |
| H | -1.25684400 | -1.69151000 | 3.34620400  |

VI.4.43 Int2<sup>M</sup> – As/Ge

|    |             |             |             |
|----|-------------|-------------|-------------|
| 0  | 1           |             |             |
| Ga | -2.33347400 | -1.10181400 | -0.01766400 |
| Fe | 2.11254200  | -1.04558700 | 0.28215800  |
| Cl | -4.30230900 | -0.14074900 | 0.27011000  |
| As | -0.69154900 | 0.62850200  | -0.43651200 |
| Ge | -1.97515500 | 2.78680100  | -0.88970100 |
| As | 0.86409800  | -0.61753500 | -1.77455600 |
| As | 0.63906100  | 0.49025900  | 1.55214200  |
| As | 2.75759500  | 1.25515500  | 0.81908000  |
| As | 2.88410300  | 0.56586200  | -1.42978600 |
| N  | -0.38419100 | 3.78888000  | -0.12169500 |
| N  | -2.04475900 | -2.36195400 | 1.42977600  |
| N  | -2.42549400 | -2.38943500 | -1.47123500 |
| N  | -1.97509900 | 2.98637400  | 1.12117200  |
| C  | 3.82186900  | -2.13386700 | 0.57942200  |
| C  | 1.72833000  | -3.06962700 | 0.32541200  |
| C  | 3.12840000  | -1.99787200 | 1.81527500  |
| C  | 2.96292900  | -2.80034700 | -0.33988800 |
| C  | -1.85860100 | -3.64464900 | 1.18907400  |
| C  | -2.16673900 | -3.66447800 | -1.27489900 |
| C  | -1.87414700 | -4.28284500 | -0.05414600 |
| H  | -1.68869700 | -5.35603700 | -0.06752400 |
| C  | -0.82629200 | 3.64039100  | 1.10786100  |
| C  | 1.83529700  | -2.57364800 | 1.65341900  |
| H  | -0.31147600 | 4.01784000  | 2.00735100  |
| H  | 3.20104900  | -3.04339500 | -1.37442800 |
| H  | 0.85518000  | -3.55928600 | -0.10335100 |
| H  | -1.67925000 | -4.28063300 | 2.06891500  |
| H  | -2.19350500 | -4.31008100 | -2.16550900 |
| H  | 1.05544800  | -2.61049400 | 2.41192000  |
| H  | 3.51061400  | -1.51825600 | 2.71475600  |
| H  | 4.82676100  | -1.77190300 | 0.36696000  |
| C  | -2.06540700 | -1.87401400 | 2.79264200  |
| H  | -1.25776000 | -1.13892800 | 2.95044600  |
| H  | -3.02550500 | -1.37498400 | 3.00141700  |
| H  | -1.93535100 | -2.69899300 | 3.51067000  |
| C  | -2.73192900 | -1.89843800 | -2.79783800 |
| H  | -3.69481800 | -1.36349300 | -2.79149600 |
| H  | -1.95076700 | -1.19665200 | -3.13630600 |
| H  | -2.79181700 | -2.72435600 | -3.52365200 |
| C  | -2.66457700 | 2.50536900  | 2.28025200  |
| H  | -2.48976400 | 3.16692300  | 3.14550800  |
| H  | -3.74536300 | 2.46054800  | 2.08741100  |
| H  | -2.33410000 | 1.48810200  | 2.55751300  |
| C  | 0.83418500  | 4.42432800  | -0.52438600 |
| H  | 1.35751200  | 4.85044900  | 0.34743900  |
| H  | 1.51501100  | 3.69840100  | -0.99822300 |
| H  | 0.64011200  | 5.23894700  | -1.24119700 |

VI.4.44 Int3<sup>M</sup> – As/Ge

|    |             |             |             |
|----|-------------|-------------|-------------|
| 0  | 1           |             |             |
| Fe | 0.59533600  | -1.98209700 | 0.64532000  |
| As | -0.68387500 | -1.58773200 | -1.36397100 |
| As | 1.56760100  | -2.30443300 | -1.63389500 |
| As | 2.63889800  | -0.99676200 | -0.00034000 |
| As | 0.77254800  | 0.46423400  | 0.78354300  |
| As | -0.45964600 | 0.84009100  | -1.31805100 |
| Ga | -2.53007100 | 1.09779600  | -0.05506100 |
| Cl | -3.23772100 | 3.19407200  | -0.07452400 |
| Ge | 2.42440900  | 1.83357100  | -0.77960600 |
| N  | 1.54995800  | 3.50262500  | 0.06432600  |
| C  | 2.56539200  | 3.66305100  | 0.88213300  |
| N  | 3.42489200  | 2.66926000  | 0.81677200  |
| C  | 0.47788100  | 4.42645300  | -0.15663200 |
| H  | 0.57156800  | 5.30243400  | 0.50883800  |
| H  | -0.50371400 | 3.96092100  | 0.03059500  |
| H  | 0.47138200  | 4.79115700  | -1.19709500 |
| H  | 2.68868500  | 4.54314900  | 1.54135200  |

|   |             |             |             |
|---|-------------|-------------|-------------|
| C | 4.61983000  | 2.52523100  | 1.58737200  |
| H | 4.60203100  | 1.59095100  | 2.17379300  |
| H | 5.51493800  | 2.49181200  | 0.94363600  |
| H | 4.74427900  | 3.36536600  | 2.29283300  |
| C | -0.98650700 | -2.93447000 | 1.58303700  |
| H | -2.03654900 | -2.84018300 | 1.31064700  |
| C | -0.05812600 | -3.88433900 | 1.06572800  |
| H | -0.26845200 | -4.64296800 | 0.31323700  |
| C | 1.20643400  | -3.64212000 | 1.67456400  |
| H | 2.12622700  | -4.18873100 | 1.47107800  |
| C | 1.06176000  | -2.55034700 | 2.57927600  |
| H | 1.84876500  | -2.11670500 | 3.19436000  |
| C | -0.29105500 | -2.11196800 | 2.51250600  |
| H | -0.71721300 | -1.27549200 | 3.06347800  |
| N | -2.77495400 | 0.53077400  | 1.80101300  |
| C | -3.56885500 | -0.47282400 | 2.11536200  |
| C | -4.33795000 | -1.24922400 | 1.24467000  |
| C | -4.48751400 | -1.00864600 | -0.12641100 |
| N | -3.89614000 | -0.06950400 | -0.83052900 |
| C | -2.16568600 | 1.32052500  | 2.84987300  |
| H | -2.52194300 | 2.36182100  | 2.79131400  |
| H | -1.06876400 | 1.33449500  | 2.73649500  |
| H | -2.41335300 | 0.91716500  | 3.84489500  |
| H | -3.64038100 | -0.71644400 | 3.18660400  |
| H | -4.91933100 | -2.06198800 | 1.67823800  |
| H | -5.18391700 | -1.66334000 | -0.67210300 |
| C | -4.17609800 | 0.06940900  | -2.24225500 |
| H | -4.95542400 | -0.63811600 | -2.56658000 |
| H | -4.51505600 | 1.09380400  | -2.46449100 |
| H | -3.26581900 | -0.12432200 | -2.83512400 |

#### VI.4.45 Int4<sup>M</sup> – As/Ge

0 1

|    |             |             |             |
|----|-------------|-------------|-------------|
| Ga | -3.24282100 | -0.88117300 | 0.00007000  |
| Fe | 1.18420600  | 1.77097700  | 0.00002200  |
| Cl | -4.61244700 | -2.60252600 | -0.00006100 |
| Ge | 2.43259700  | -1.08132100 | -0.00010000 |
| N  | 2.67777000  | -3.07086700 | -0.00020500 |
| N  | -3.77574100 | 0.31010100  | 1.45837700  |
| N  | 4.33756600  | -1.66459000 | -0.00026300 |
| N  | -3.77586600 | 0.31040400  | -1.45794400 |
| C  | 0.18503200  | 3.54804800  | 0.00029500  |
| C  | 1.01879900  | 3.46296900  | 1.15226100  |
| C  | 1.01838700  | 3.46310800  | -1.15198200 |
| C  | 2.36828000  | 3.32931300  | 0.70826100  |
| C  | 2.36802300  | 3.32940600  | -0.70848300 |
| C  | 3.98508000  | -2.93414100 | -0.00029900 |
| C  | -4.19168400 | 2.20803600  | 0.00043200  |
| H  | -4.45144000 | 3.26591900  | 0.00055300  |
| C  | -4.08077600 | 1.57126700  | 1.24161900  |
| C  | -4.08088600 | 1.57152400  | -1.24089700 |
| H  | -4.28253800 | 2.18452300  | -2.13283100 |
| H  | -4.28234100 | 2.18408300  | 2.13369900  |
| H  | 4.69996600  | -3.77470000 | -0.00043700 |
| H  | 3.24254500  | 3.22142800  | -1.34730600 |
| H  | 0.68384600  | 3.48899600  | -2.18843600 |
| H  | -0.90136000 | 3.63281600  | 0.00049400  |
| H  | 0.68463000  | 3.48873100  | 2.18883800  |
| H  | 3.24303300  | 3.22126100  | 1.34675600  |
| As | -0.86753200 | -1.40675900 | -0.00005900 |
| As | -0.31467400 | 0.52021600  | -1.45542500 |
| As | -0.31459000 | 0.52009100  | 1.45544600  |
| As | 2.00328100  | 0.25218300  | 1.88869200  |
| As | 2.00317100  | 0.25229800  | -1.88879200 |
| C  | 5.65959100  | -1.11843100 | -0.00059500 |
| H  | 5.82738600  | -0.49025700 | 0.88949300  |
| H  | 6.41587300  | -1.92078500 | -0.00070100 |
| H  | 5.82700400  | -0.49038100 | -0.89084500 |
| C  | 1.90442700  | -4.27453900 | 0.00004200  |
| H  | 1.25229900  | -4.32064500 | -0.88644500 |
| H  | 2.55924400  | -5.16179200 | -0.00116800 |
| H  | 1.25421500  | -4.32165200 | 0.88789700  |
| C  | -3.75123700 | -0.21615100 | -2.80322000 |
| H  | -4.05642900 | 0.54647600  | -3.53733600 |
| H  | -2.73447400 | -0.55791900 | -3.06335700 |
| H  | -4.43105900 | -1.07946900 | -2.88402500 |
| C  | -3.75096700 | -0.21672800 | 2.80354300  |
| H  | -2.73417300 | -0.55853800 | 3.06350300  |

|   |             |             |            |
|---|-------------|-------------|------------|
| H | -4.05608900 | 0.54574700  | 3.53784600 |
| H | -4.43077200 | -1.08006900 | 2.88424400 |

VI.4.46 Int5<sup>M</sup> – As/Ge

|    |             |             |             |
|----|-------------|-------------|-------------|
| 0  | 1           |             |             |
| Ga | -3.36917400 | 0.32832300  | 0.13570600  |
| Fe | 0.97828700  | -0.79696800 | 0.87334100  |
| Cl | -2.90781800 | 0.04306700  | 2.28866300  |
| As | 0.00516500  | 1.23824300  | 0.07589600  |
| As | 1.89365300  | 0.37542600  | -1.08117200 |
| As | 1.54245900  | -1.95656900 | -1.18955700 |
| As | -0.72407400 | -1.87011100 | -0.47211900 |
| As | -1.56608900 | 0.20665900  | -1.48406900 |
| Ge | 4.15795500  | 1.30936500  | -1.11219600 |
| N  | -4.88376200 | -0.84894600 | -0.24676900 |
| N  | -4.35576600 | 2.01629100  | 0.03531400  |
| N  | 4.93720200  | 0.10095200  | 0.14000300  |
| N  | 4.06191700  | 1.98730500  | 0.66926300  |
| C  | 0.23322100  | -1.66334000 | 2.60104000  |
| C  | 1.42944000  | -2.32111800 | 2.19811000  |
| C  | 2.47649200  | -1.35514300 | 2.17250100  |
| C  | 1.92925800  | -0.10318200 | 2.57770600  |
| C  | 0.54173900  | -0.29547600 | 2.83459300  |
| C  | 4.73737700  | 0.95129600  | 1.12831900  |
| C  | -6.08557900 | -0.37421100 | -0.49576000 |
| C  | -6.47313900 | 0.96937400  | -0.53092700 |
| H  | -7.51521500 | 1.18387600  | -0.76448200 |
| C  | -5.63760200 | 2.05718800  | -0.25826200 |
| H  | -6.87099700 | -1.12004000 | -0.69372500 |
| H  | -6.09967400 | 3.05626300  | -0.28783200 |
| H  | 5.09454700  | 0.82657100  | 2.16495200  |
| H  | -0.17791600 | 0.46044900  | 3.14214800  |
| H  | 2.46072300  | 0.84108400  | 2.66906300  |
| H  | 3.50965200  | -1.55471500 | 1.89856200  |
| H  | 1.52503300  | -3.37294100 | 1.93301300  |
| H  | -0.75639300 | -2.10501400 | 2.69724700  |
| C  | 3.56352900  | 3.11281900  | 1.39964100  |
| H  | 2.46053900  | 3.13242200  | 1.37614400  |
| H  | 3.88632400  | 3.06764700  | 2.45255200  |
| H  | 3.93015200  | 4.05838000  | 0.97000200  |
| C  | 5.62520100  | -1.15329800 | 0.17649800  |
| H  | 6.01270100  | -1.35686000 | 1.18798800  |
| H  | 4.94469700  | -1.97453500 | -0.10421300 |
| H  | 6.47629800  | -1.16191500 | -0.52299000 |
| C  | -4.65943700 | -2.27699200 | -0.19647100 |
| H  | -3.87188100 | -2.57286800 | -0.90897100 |
| H  | -4.31751400 | -2.57352600 | 0.80868900  |
| H  | -5.57915900 | -2.83475100 | -0.43531900 |
| C  | -3.63549700 | 3.23084400  | 0.34291000  |
| H  | -3.26809900 | 3.20387700  | 1.38218100  |
| H  | -2.75589900 | 3.33599100  | -0.31412500 |
| H  | -4.27455900 | 4.11978400  | 0.21800500  |

VI.4.47 Int6<sup>M</sup> – As/Ge

|    |             |             |             |
|----|-------------|-------------|-------------|
| 0  | 1           |             |             |
| Ga | 2.67265200  | 0.06913300  | -0.01689500 |
| Fe | -1.56819100 | -1.10112700 | 0.87990200  |
| Cl | 1.99874800  | 1.68079500  | 1.40992400  |
| Ge | -0.37012000 | 3.02770500  | -0.50526400 |
| N  | -1.15468400 | 3.30024900  | 1.34583000  |
| N  | 3.65111900  | -1.17418000 | 1.12515800  |
| N  | -2.40428200 | 3.35611400  | -0.43708300 |
| N  | 4.23477800  | 0.84911300  | -0.90446000 |
| C  | -1.04242900 | -1.91254600 | 2.70392100  |
| C  | -0.94145800 | -0.49348600 | 2.72340700  |
| C  | -2.38947600 | -2.26367600 | 2.39843400  |
| C  | -2.23820200 | 0.03564400  | 2.43383900  |
| C  | -3.12612600 | -1.05830200 | 2.23029900  |
| C  | -2.35876600 | 3.53503900  | 0.86282200  |
| C  | 5.83380000  | -0.59057500 | 0.21603500  |
| H  | 6.89424300  | -0.82958600 | 0.28463500  |
| C  | 4.96255000  | -1.28964400 | 1.05509400  |
| C  | 5.45665600  | 0.42216400  | -0.67190000 |
| H  | 6.26401600  | 0.91889000  | -1.23187300 |
| H  | 5.41937000  | -2.01590200 | 1.74451100  |
| H  | -3.21964500 | 3.85548800  | 1.47786200  |
| H  | -4.17952400 | -0.98618900 | 1.96421700  |

|    |             |             |             |
|----|-------------|-------------|-------------|
| H  | -2.78121900 | -3.27377100 | 2.29376100  |
| H  | -0.22894600 | -2.61450900 | 2.87909900  |
| H  | -0.03363600 | 0.08525300  | 2.89109300  |
| H  | -2.49410000 | 1.09037600  | 2.36083600  |
| As | 1.05131100  | -0.65271000 | -1.68788900 |
| As | 0.10094300  | -2.46799900 | -0.28725800 |
| As | -0.66809600 | 0.53711300  | -0.50504500 |
| As | -2.78057100 | -0.32042200 | -1.16455800 |
| As | -2.17028700 | -2.59116500 | -0.97703700 |
| C  | -3.54993100 | 3.50595200  | -1.28117500 |
| H  | -3.77076100 | 2.56448100  | -1.81109300 |
| H  | -4.44179600 | 3.77885200  | -0.69157800 |
| H  | -3.38969400 | 4.29155300  | -2.03816600 |
| C  | -0.73270600 | 3.46245400  | 2.70417000  |
| H  | 0.02397700  | 4.25863800  | 2.79903300  |
| H  | -1.58842000 | 3.72481200  | 3.34956600  |
| H  | -0.28060000 | 2.53494400  | 3.08671400  |
| C  | 4.00340800  | 1.94668500  | -1.81669800 |
| H  | 4.94072000  | 2.27931500  | -2.29055600 |
| H  | 3.29813900  | 1.64533400  | -2.60914300 |
| H  | 3.55662000  | 2.80129600  | -1.28190600 |
| C  | 2.91720800  | -1.91946900 | 2.12565000  |
| H  | 2.13709600  | -2.53811000 | 1.65167400  |
| H  | 3.58790600  | -2.57604100 | 2.70217900  |
| H  | 2.41757900  | -1.22848800 | 2.82466400  |

#### VI.4.48 Int7<sup>M</sup> – As/Ge

|    |             |             |             |
|----|-------------|-------------|-------------|
| 0  |             |             |             |
| 1  |             |             |             |
| Ga | 2.72785800  | -0.57811000 | 0.08975900  |
| Fe | -2.25494600 | -1.14004800 | 0.47127900  |
| Cl | 2.27747000  | -0.08638800 | 2.21810700  |
| As | 1.17958300  | 0.32005600  | -1.54901500 |
| As | -1.42764900 | 0.80825700  | 1.61115400  |
| As | -0.56332900 | -1.42149100 | -1.23182600 |
| Ge | 0.20568100  | 1.66426200  | 0.14407800  |
| As | -2.59664100 | -0.36157300 | -1.84636300 |
| As | -3.14786100 | 1.08367400  | -0.03717300 |
| N  | 3.13498700  | -2.48717600 | 0.09217500  |
| N  | 1.33447400  | 3.14285200  | 0.87530600  |
| N  | 4.54821500  | 0.04813800  | -0.27250700 |
| N  | -0.21068700 | 3.45717700  | -0.62393500 |
| C  | -3.71964500 | -1.69223600 | 1.84973500  |
| C  | 4.33914600  | -2.93692300 | -0.19164800 |
| C  | 5.53544300  | -0.78797000 | -0.52006100 |
| C  | -3.92578900 | -2.34473700 | 0.60347100  |
| C  | -2.77131000 | -3.12434800 | 0.31480400  |
| C  | 5.47245800  | -2.18324000 | -0.51519100 |
| H  | 6.38678300  | -2.72837400 | -0.74588000 |
| C  | 0.69406700  | 4.02964000  | 0.13262800  |
| C  | -1.84103800 | -2.94628500 | 1.38322400  |
| C  | -2.42947800 | -2.06320900 | 2.32795400  |
| H  | 0.89628800  | 5.11392500  | 0.15041400  |
| H  | 6.51284200  | -0.33625600 | -0.74987900 |
| H  | 4.46606100  | -4.02983000 | -0.16157900 |
| H  | -4.41508600 | -1.01294500 | 2.34019100  |
| H  | -4.80151300 | -2.24093700 | -0.03530300 |
| H  | -2.62015200 | -3.73643000 | -0.57363800 |
| H  | -0.85512500 | -3.39937600 | 1.46240000  |
| H  | -1.96870700 | -1.72621400 | 3.25503300  |
| C  | 2.09411400  | -3.41311500 | 0.48871200  |
| H  | 1.71555200  | -3.14425000 | 1.48834600  |
| H  | 1.24540500  | -3.36661900 | -0.21402900 |
| H  | 2.47446600  | -4.44632900 | 0.52098700  |
| C  | 4.79149900  | 1.47216800  | -0.25906400 |
| H  | 4.01582900  | 1.99802500  | -0.83980400 |
| H  | 4.75647300  | 1.86493700  | 0.77109100  |
| H  | 5.77544200  | 1.71675100  | -0.69051000 |
| C  | -1.00612000 | 4.04081000  | -1.66065600 |
| H  | -2.06044200 | 3.75116900  | -1.53275100 |
| H  | -0.93643100 | 5.14074500  | -1.63634600 |
| H  | -0.68219700 | 3.69118800  | -2.65496300 |
| C  | 2.16380800  | 3.42997500  | 2.01107600  |
| H  | 2.72528800  | 4.36718700  | 1.85809900  |
| H  | 1.57206100  | 3.52489500  | 2.93772800  |
| H  | 2.87611700  | 2.60904100  | 2.16542700  |

VI.4.49 Int8<sup>M</sup> – As/Ge

|    |             |             |             |
|----|-------------|-------------|-------------|
| 0  | 1           |             |             |
| Fe | 2.65657700  | -0.41271100 | 0.64723800  |
| As | 2.41639800  | 1.74743500  | -0.53809100 |
| As | 3.15097100  | -0.12802700 | -1.77271200 |
| As | 2.08648300  | -2.10293900 | -1.02749600 |
| As | 0.33899300  | -1.41319300 | 0.41796200  |
| As | -1.09507000 | -0.28869200 | -1.30453100 |
| Ge | 0.11634600  | 1.42177800  | -0.22986600 |
| Ga | -3.15414300 | -0.15743800 | -0.02062000 |
| Cl | -3.99711100 | 1.84179700  | 0.48175700  |
| N  | -0.48946800 | 1.95161300  | 1.56562600  |
| C  | -1.07409500 | 3.05721900  | 1.11948200  |
| N  | -0.92210200 | 3.19982100  | -0.16852700 |
| C  | -0.16584500 | 1.66680600  | 2.93115900  |
| H  | -0.20438600 | 0.58413200  | 3.10744900  |
| H  | 0.84611400  | 2.01311800  | 3.20290700  |
| H  | -0.88906300 | 2.15150300  | 3.60818000  |
| H  | -1.62819800 | 3.75316700  | 1.76872200  |
| C  | -1.65739700 | 4.09177200  | -1.01340900 |
| H  | -2.55463600 | 3.59692400  | -1.42228900 |
| H  | -1.02525800 | 4.42576400  | -1.84906600 |
| H  | -1.99114900 | 4.98309300  | -0.45597800 |
| C  | 2.63737700  | -0.61149700 | 2.71049600  |
| H  | 1.75135900  | -0.61659400 | 3.34164900  |
| C  | 3.22865000  | -1.75520000 | 2.10092900  |
| H  | 2.87858400  | -2.78273300 | 2.18900300  |
| C  | 4.35859500  | -1.31285900 | 1.35129000  |
| H  | 5.00708900  | -1.94146600 | 0.74293600  |
| C  | 4.46464700  | 0.09412400  | 1.49854300  |
| H  | 5.21143800  | 0.73141000  | 1.02758000  |
| C  | 3.39408700  | 0.53071400  | 2.33662700  |
| H  | 3.19877800  | 1.55896200  | 2.63480300  |
| N  | -4.54361000 | -1.00329200 | -1.11955600 |
| C  | -5.23237400 | -2.04142400 | -0.69928500 |
| C  | -5.11956200 | -2.67360500 | 0.54327900  |
| C  | -4.27799300 | -2.26269800 | 1.57909800  |
| N  | -3.41776500 | -1.26391800 | 1.56505200  |
| C  | -4.81739700 | -0.42306900 | -2.41490600 |
| H  | -3.90378500 | -0.40834300 | -3.03259900 |
| H  | -5.16026100 | 0.61850800  | -2.30035300 |
| H  | -5.59248100 | -0.99102800 | -2.95383100 |
| H  | -5.98012800 | -2.44816300 | -1.39756600 |
| H  | -5.76397000 | -3.53125700 | 0.73149000  |
| H  | -4.34394400 | -2.82841900 | 2.52088200  |
| C  | -2.66451700 | -0.95114600 | 2.75856600  |
| H  | -2.78619800 | 0.11353600  | 3.01372200  |
| H  | -3.00449300 | -1.55609000 | 3.61413600  |
| H  | -1.59119100 | -1.14802400 | 2.59637000  |

VI.4.50 Int9<sup>M</sup> – As/Ge

|    |             |             |             |
|----|-------------|-------------|-------------|
| 0  | 1           |             |             |
| Ga | -3.02528000 | 0.07439800  | -0.12172700 |
| Fe | 2.24612200  | -1.14074500 | 0.18026500  |
| Cl | -2.84385400 | -0.66640800 | -2.18435600 |
| As | 0.07341900  | 1.65858100  | -1.21350000 |
| As | 1.04657000  | -0.58252200 | -1.97106100 |
| As | 0.21829700  | -2.26352600 | -0.56251500 |
| As | 0.16627800  | -1.00036700 | 1.46218900  |
| As | -1.04482600 | 1.06998800  | 0.87093600  |
| Ge | 1.97583800  | 1.07847100  | 0.11371400  |
| N  | -4.45716200 | 1.41715200  | -0.17250400 |
| N  | -3.99877900 | -1.25825000 | 0.92566900  |
| N  | 2.38281500  | 2.35213400  | 1.60181800  |
| N  | 3.52316100  | 2.31529100  | -0.25250300 |
| C  | 3.45189900  | -1.75786600 | 1.74698400  |
| C  | 3.08669700  | -2.86274800 | 0.93226000  |
| C  | 3.55531500  | -2.61008000 | -0.39456400 |
| C  | 4.21082300  | -1.35196300 | -0.39896400 |
| C  | 4.13504000  | -0.81616800 | 0.92515000  |
| C  | 3.36347500  | 2.89861200  | 0.91672900  |
| C  | -5.59981500 | 1.24577800  | 0.45288500  |
| C  | -5.97993300 | 0.13158100  | 1.20931100  |
| H  | -6.96804000 | 0.14856400  | 1.66744900  |
| C  | -5.21365800 | -1.02509000 | 1.37906400  |
| H  | -6.33514600 | 2.06086100  | 0.36385000  |
| H  | -5.67937300 | -1.84319400 | 1.94996100  |

|   |             |             |             |
|---|-------------|-------------|-------------|
| H | 3.97345400  | 3.74534200  | 1.27611400  |
| H | 4.56398100  | 0.12837200  | 1.25796700  |
| H | 4.66527300  | -0.87113800 | -1.26353400 |
| H | 3.41307200  | -3.26123900 | -1.25555100 |
| H | 2.53734700  | -3.74486000 | 1.25714200  |
| H | 3.21893100  | -1.63625300 | 2.80347500  |
| C | 4.43738900  | 2.68216700  | -1.28904200 |
| H | 3.90031500  | 3.00037600  | -2.19799300 |
| H | 5.08745100  | 3.51400000  | -0.96954500 |
| H | 5.08396400  | 1.83337400  | -1.56600000 |
| C | 1.90987000  | 2.70688800  | 2.90484100  |
| H | 2.48122100  | 3.55664700  | 3.31482900  |
| H | 0.84448400  | 2.98535500  | 2.86684000  |
| H | 2.00442500  | 1.85853900  | 3.60237800  |
| C | -4.22452900 | 2.60031500  | -0.96832400 |
| H | -3.32231400 | 3.12963600  | -0.61777500 |
| H | -4.05444100 | 2.32180400  | -2.02130500 |
| H | -5.07936000 | 3.29403600  | -0.91829200 |
| C | -3.38482300 | -2.55096200 | 1.14669500  |
| H | -3.09554400 | -3.00295600 | 0.18406000  |
| H | -2.46702300 | -2.45018400 | 1.74900800  |
| H | -4.07756100 | -3.23434800 | 1.66366200  |



**VII. References**

- [S1] J. Schoening, A. Gehlhaar, C. Wölper and S. Schulz, *Chem. Eur. J.*, 2022, **28**, e202201031;
- [S2] N. J. Hardman, B. E. Eichler and P. P. Power, *Chem. Commun.*, 2022, 1991-1992.
- [S3] S. Nagendran, S. S. Sen, H. W. Roesky, D. Koley, H. Grubmüller, A. Pal. and R. Herbst-Irmer, *Organometallics*, 2008, **27**, 5459-5436.
- [S4] O. J. Scherer and T. Brück, *Angew. Chem. Int. Ed*, 1987, **26**, 59-59.
- [S5] O. J. Scherer, C. Blath and G. Wolmershäuser, *J. Organomet. Chem*, 1990, **387**, C21-C24.
- [S6] P. H. M. Budzelaar, *Ivory Software Corp.: Centennial*, CO, 2006.
- [S7]. G. Sheldrick, *Acta Cryst. A* 2008, **64**, 112-122.
- [S8] G. Sheldrick, *Acta Cryst. C* 2015, **A71**, 3-8.
- [S9] O. V. Dolomanov, L. J. Bourhis, R. J. Gildea, J. A. K. Howard and H. Puschmann, *J. Appl. Cryst.* 2009, **42**, 339-341.
- [S10] M. J. Frisch, G. W. Trucks, H. B. Schlegel, G. E. Scuseria, M. A. Robb, J. R. Cheeseman, G. Scalmani, V. Barone, G. A. Petersson *et al.*, *Gaussian 16*, Revision B.01, 2016.
